# Supplementary material for: Phylogeography of Sub-Saharan Mitochondrial Lineages Outside Africa Highlights the Roles of the Holocene Climate Changes and the Atlantic Slave Trade
Source: MDPI journal article supplement (doi:10.3390/ijms23169219), 2022-08-16
Supplement: s1 [file s1]

Table S2. Detected founders in each model, including their  $\rho$  estimate and standard error.

| Clade                   | Probable Source | Sink (model)   | number of samples (n) | $\rho$ estimate | Standard error |
|-------------------------|-----------------|----------------|-----------------------|-----------------|----------------|
| L0a1                    | East Africa     | North America  | 1                     | 0               |                |
| L0a1a+64T               | North Africa    | Southwest Asia | 3                     | 4.666667        | 1.699673       |
| L0a1a1                  | West Africa     | Europe         | 1                     | 0               |                |
| L0a1a1                  | East Africa     | Southwest Asia | 3                     | 4.333333        | 1.452966       |
| L0a1a2                  | East Africa     | North America  | 3                     | 1.333333        | 0.816497       |
| L0a1a2+200G             | West Africa     | North America  | 3                     | 3               | 1              |
| L0a1a2+200G+12172G      | Southern Africa | North America  | 1                     | 0               |                |
| L0a1a2+200G+16362C      | West Africa     | North America  | 1                     | 0               |                |
| L0a1a2+200G+16362C+150T | West Africa     | North America  | 1                     | 0               |                |
| L0a1a2+200G+16362C+236C | Southern Africa | North Africa   | 1                     | 0               |                |
| L0a1a2+200G+16362C+236C | Southern Africa | North America  | 2                     | 1.5             | 0.866025       |
| L0a1a2+200G+8521G       | West Africa     | North America  | 1                     | 0               |                |
| L0a1a3                  | West Africa     | North America  | 1                     | 0               |                |
| L0a1b+5563A             | Southern Africa | South America  | 2                     | 0               | 0              |
| L0a1b+5563A+15099C+152C | Southern Africa | Southwest Asia | 1                     | 0               |                |
| L0a1b+5563A+7711C       | Southern Africa | North America  | 3                     | 0               | 0              |
| L0a1b1                  | Southern Africa | North America  | 2                     | 2.5             | 1.118034       |
| L0a1b1+16093C+3644C     | Southern Africa | North America  | 2                     | 0               | 0              |
| L0a1b1+16188G           | Southern Africa | North Africa   | 2                     | 1               | 0.707107       |
| L0a1b1+16188G+16187T    | East Africa     | Southwest Asia | 1                     | 0               |                |
| L0a1b1a+3311T           | Central Africa  | North Africa   | 4                     | 0               | 0              |
| L0a1b1a+3311T+593C      | North Africa    | Southwest Asia | 1                     | 0               |                |
| L0a1b1a1+16188G+15481T  | East Africa     | Southwest Asia | 1                     | 0               |                |
| L0a1c1                  | East Africa     | Southwest Asia | 1                     | 0               |                |
| L0a1d                   | East Africa     | Southwest Asia | 4                     | 1               | 0.612372       |

|                             |                  |                |    |          |          |
|-----------------------------|------------------|----------------|----|----------|----------|
| L0a2a1a1                    | Southern Africa  | North America  | 1  | 0        |          |
| L0a2a1b+16188G+16093C       | Southern Africa  | North America  | 1  | 0        |          |
| L0a2a2                      | East Africa      | Southwest Asia | 3  | 0        | 0        |
| L0a2a2+16188G               | East Africa      | Southwest Asia | 15 | 0.866667 | 0.371184 |
| L0a2a2+16188G+150T          | Southern Africa  | North America  | 1  | 0        |          |
| L0a2a2+16188G+64T           | East Africa      | Southwest Asia | 2  | 0        | 0        |
| L0a2a2+16188G+64T           | Southern Africa  | South America  | 1  | 0        |          |
| L0a2a2a+16187T+16188T+7146G | East Africa      | North Africa   | 1  | 0        |          |
| L0a2a2a+16274A              | East Africa      | Southwest Asia | 1  | 0        |          |
| L0a2a2a+16274A+5201C        | East Africa      | North Africa   | 1  | 0        |          |
| L0a2a2a1                    | Southern Africa  | North America  | 2  | 0        | 0        |
| L0a2c+95C                   | East Africa      | Southwest Asia | 7  | 3.142857 | 0.92582  |
| L0d3+152C                   | East Africa      | Southwest Asia | 2  | 5        | 1.581139 |
| L0f+1822C+143A              | East Africa      | Southwest Asia | 2  | 0        | 0        |
| L0f2a1+11299C               | East Africa      | Southwest Asia | 1  | 0        |          |
| L0f2b+7419A                 | East Africa      | Southwest Asia | 1  | 0        |          |
| L0k+198T+204C+15221A+3882A  | East Africa      | Southwest Asia | 1  | 0        |          |
| L1b+16292T+11812G           | West Africa      | North America  | 1  | 0        |          |
| L1b1a                       | West Africa      | North Africa   | 6  | 3.666667 | 0.971825 |
| L1b1a                       | North Africa     | Europe         | 10 | 4.4      | 1.029563 |
| L1b1a                       | North Africa     | Europe         | 10 | 4.4      | 1.029563 |
| L1b1a                       | West Africa      | North America  | 1  | 0        |          |
| L1b1a+1462A+11002G+198T     | Europe (Western) | South America  | 2  | 0        | 0        |
| L1b1a+146C                  | West Africa      | North America  | 1  | 0        |          |
| L1b1a+16145A                | West Africa      | Europe         | 1  | 0        |          |
| L1b1a+16145A+3966T          | West Africa      | Europe         | 1  | 0        |          |
| L1b1a+16145A+3966T          | West Africa      | Europe         | 1  | 0        |          |
| L1b1a+16293C                | West Africa      | North Africa   | 2  | 0        | 0        |

|                         |              |                |   |          |          |
|-------------------------|--------------|----------------|---|----------|----------|
| L1b1a+16293C            | West Africa  | North America  | 2 | 1        | 0.707107 |
| L1b1a+16293C+152C       | West Africa  | North America  | 1 | 0        |          |
| L1b1a+16293C+152C+73G   | North Africa | North America  | 1 | 0        |          |
| L1b1a+16293C+3505G      | West Africa  | North America  | 1 | 0        |          |
| L1b1a+16293C+8251A      | West Africa  | Europe         | 2 | 0        | 0        |
| L1b1a+16293C+8251A      | West Africa  | North America  | 1 | 0        |          |
| L1b1a+182T+189G+12696C  | West Africa  | North America  | 1 | 0        |          |
| L1b1a+185C              | West Africa  | Europe         | 8 | 3        | 0.829156 |
| L1b1a+185C              | West Africa  | Europe         | 8 | 2.875    | 0.81968  |
| L1b1a+189G              | West Africa  | Europe         | 7 | 4        | 1.087968 |
| L1b1a+189G              | West Africa  | Europe         | 7 | 4        | 1.087968 |
| L1b1a+189G              | West Africa  | North America  | 1 | 0        |          |
| L1b1a+189G+16293G+6446A | West Africa  | Southwest Asia | 1 | 0        |          |
| L1b1a+189G+16293G+6446A | West Africa  | North America  | 2 | 1.5      | 0.866025 |
| L1b1a10                 | West Africa  | North America  | 2 | 0.5      | 0.5      |
| L1b1a13                 | North Africa | Europe         | 1 | 0        |          |
| L1b1a14                 | West Africa  | Europe         | 3 | 5.666667 | 1.795055 |
| L1b1a14                 | West Africa  | Europe         | 3 | 5.666667 | 1.795055 |
| L1b1a14+16256T          | West Africa  | North America  | 1 | 0        |          |
| L1b1a15+152C            | West Africa  | North America  | 1 | 0        |          |
| L1b1a15+199C            | East Africa  | Southwest Asia | 1 | 0        |          |
| L1b1a15+4080C           | West Africa  | North America  | 1 | 0        |          |
| L1b1a15a+146C           | West Africa  | North America  | 1 | 0        |          |
| L1b1a17+7859A           | West Africa  | North America  | 1 | 0        |          |
| L1b1a2                  | East Africa  | Southwest Asia | 3 | 0        | 0        |
| L1b1a2a                 | East Africa  | North Africa   | 1 | 0        |          |
| L1b1a2a+16126C          | East Africa  | Europe         | 1 | 0        |          |
| L1b1a2a+16126C          | East Africa  | Europe         | 1 | 0        |          |

|                      |                 |                |   |          |          |
|----------------------|-----------------|----------------|---|----------|----------|
| L1b1a3               | West Africa     | Europe         | 1 | 0        |          |
| L1b1a3               | West Africa     | Europe         | 1 | 0        |          |
| L1b1a3               | West Africa     | North America  | 6 | 0.333333 | 0.235702 |
| L1b1a3+11020G        | Southern Africa | North America  | 4 | 0        | 0        |
| L1b1a3a              | West Africa     | Europe         | 1 | 0        |          |
| L1b1a3a              | West Africa     | Europe         | 1 | 0        |          |
| L1b1a3a              | West Africa     | Southwest Asia | 2 | 0        | 0        |
| L1b1a3a              | West Africa     | North America  | 9 | 0.666667 | 0.351364 |
| L1b1a3a1             | West Africa     | North America  | 3 | 1        | 0.745356 |
| L1b1a3b              | West Africa     | North America  | 2 | 2.5      | 1.118034 |
| L1b1a4+16114A        | West Africa     | North America  | 2 | 2        | 1        |
| L1b1a4+16114A+10172A | West Africa     | North America  | 1 | 0        |          |
| L1b1a4+16114A+16234T | West Africa     | North America  | 3 | 0.333333 | 0.333333 |
| L1b1a4+3849A         | West Africa     | North America  | 1 | 0        |          |
| L1b1a4a+16114G       | West Africa     | North America  | 2 | 0.5      | 0.5      |
| L1b1a5               | North Africa    | Europe         | 2 | 1        | 0.707107 |
| L1b1a6               | West Africa     | North Africa   | 3 | 3.333333 | 1.054093 |
| L1b1a6               | North Africa    | Europe         | 8 | 3        | 0.790569 |
| L1b1a6               | North Africa    | Europe         | 8 | 3        | 0.790569 |
| L1b1a6+3385G         | West Africa     | North America  | 2 | 0.5      | 0.5      |
| L1b1a7               | West Africa     | North America  | 1 | 0        |          |
| L1b1a7+14053G        | West Africa     | North America  | 1 | 0        |          |
| L1b1a7+16293G        | West Africa     | North America  | 3 | 1        | 0.57735  |
| L1b1a7+9855G         | West Africa     | North America  | 1 | 0        |          |
| L1b1a7a              | West Africa     | North America  | 1 | 0        |          |
| L1b1a7a+15224T       | West Africa     | Europe         | 1 | 0        |          |
| L1b1a7a+15224T       | West Africa     | Europe         | 1 | 0        |          |
| L1b1a7a+15224T       | West Africa     | North America  | 2 | 0.5      | 0.5      |

|                                       |                 |                  |   |          |          |
|---------------------------------------|-----------------|------------------|---|----------|----------|
| L1b1a8                                | North Africa    | Europe           | 6 | 3.833333 | 1.190238 |
| L1b1a8                                | North Africa    | Europe           | 6 | 3.833333 | 1.190238 |
| L1b1a8+16270T+5174A                   | North Africa    | North America    | 1 | 0        |          |
| L1b2a+569T                            | West Africa     | Europe           | 1 | 0        |          |
| L1c1+247A+16294T+16172C               | West Africa     | North America    | 1 | 0        |          |
| L1c1a                                 | Central Africa  | North America    | 1 | 0        |          |
| L1c1a+198T+93G+89C                    | Southern Africa | South America    | 1 | 0        |          |
| L1c1b+416A+4688C+10861C+508G          | Southern Africa | South America    | 1 | 0        |          |
| L1c1b+416A+4688C+520T                 | WEST AFRICA     | North America    | 1 | 0        |          |
| L1c1b+4688C+5876G                     | Southern Africa | North America    | 1 | 0        |          |
| L1c1d1+8657T+4167T                    | Central Africa  | North America    | 1 | 0        |          |
| L1c2a1a+8251A+5585A                   | Southern Africa | North America    | 1 | 0        |          |
| L1c2a2+7070T+6990T                    | West Africa     | North America    | 1 | 0        |          |
| L1c2b1a                               | Southern Africa | North America    | 1 | 0        |          |
| L1c2b1a'b+12477+1598A+6962A+200G+513A | East Africa     | Southwest Asia   | 1 | 0        |          |
| L1c2b1b+513A                          | Southern Africa | North America    | 1 | 0        |          |
| L1c2b1b1+16093C                       | Southern Africa | Southern America | 1 | 0        |          |
| L1c2b1c+5580C                         | West Africa     | Europe           | 1 | 0        |          |
| L1c2b1c+5580C                         | West Africa     | Europe           | 1 | 0        |          |
| L1c2b1c+5580C                         | West Africa     | North America    | 1 | 0        |          |
| L1c2b1c+5580C16129A                   | West Africa     | North America    | 1 | 0        |          |
| L1c2b2+182T+4722G                     | Southern Africa | North America    | 1 | 0        |          |
| L1c2b2+8621G                          | Southern Africa | Southwest Asia   | 3 | 4        | 1.490712 |
| L1c3+195C                             | West Africa     | North Africa     | 1 | 0        |          |
| L1c3+195C+6260A+16215G                | West Africa     | North America    | 1 | 0        |          |
| L1c3+195C+6260A+16215G+16093C         | Central Africa  | North America    | 1 | 0        |          |
| L1c3+195C+6260A+16215G+16145A         | West Africa     | North America    | 3 | 1.333333 | 0.942809 |
| L1c3+195C+6260A+16215G+6791+16368C    | Southern Africa | North America    | 2 | 0.5      | 0.5      |

|                                      |                 |                  |    |          |          |
|--------------------------------------|-----------------|------------------|----|----------|----------|
| L1c3a1a                              | West Africa     | North Africa     | 2  | 0        | 0        |
| L1c3a1a+16093C                       | West Africa     | North America    | 1  | 0        |          |
| L1c3a1b+783G                         | Southern Africa | South America    | 1  | 0        |          |
| L1c3a1b+783G+16390A+16093C           | West Africa     | North America    | 1  | 0        |          |
| L1c3b1                               | West Africa     | Southwest Asia   | 1  | 0        |          |
| L1c3b1+195C+513A                     | West Africa     | Southern America | 1  | 0        |          |
| L1c3b1a                              | Southern Africa | Southern America | 3  | 1.666667 | 0.881917 |
| L1c3b1a                              | Southern Africa | North America    | 2  | 0.5      | 0.5      |
| L1c3b1b                              | West Africa     | North America    | 1  | 0        |          |
| L1c3b2+16086C+16104T+14929T          | West Africa     | North America    | 11 | 0        | 0        |
| L1c4b+9494G                          | Central Africa  | North America    | 1  | 0        |          |
| L1c4b+9494G+146C                     | Central Africa  | North America    | 1  | 0        |          |
| L1c5+7762A+195C                      | West Africa     | North America    | 2  | 0.5      | 0.5      |
| L2a1+143A+16189C+16192T              | West Africa     | Europe           | 4  | 4.25     | 1.520691 |
| L2a1+16189C+143A                     | East Africa     | North Africa     | 10 | 4.4      | 1.148913 |
| L2a1+16189C+143A+11016A+5135T        | East Africa     | Southwest Asia   | 1  | 0        |          |
| L2a1+16189C+143A+16192T+16093C       | North Africa    | Southwest Asia   | 4  | 4        | 1.581139 |
| L2a1+16189C+143A+16192T+16093C+5460A | North Africa    | Europe           | 1  | 0        |          |
| L2a1+16189C+143A+16192T+16093C+5460A | North Africa    | Europe           | 1  | 0        |          |
| L2a1+16189C+143A+16192T+16292T       | North Africa    | Southwest Asia   | 2  | 0        | 0        |
| L2a1+16189C+143A+16309G+16192T       | East Africa     | Southwest Asia   | 7  | 4.285714 | 1.498298 |
| L2a1+16189C+143A+16309G+16192T       | Southwest Asia  | North America    | 1  | 0        |          |
| L2a1+16189C+143A+16309G+16192T+4688C | North Africa    | Southwest Asia   | 1  | 0        |          |
| L2a1+16189C+143A+16309G+16192T+8788T | Southwest Asia  | North America    | 1  | 0        |          |
| L2a1+16189C+143A+16309G+6743C        | East Africa     | Southwest Asia   | 1  | 0        |          |
| L2a1a                                | West Africa     | North Africa     | 1  | 0        |          |
| L2a1a                                | West Africa     | North America    | 5  | 0.6      | 0.34641  |
| L2a1a+15391T+4161T                   | North Africa    | North America    | 1  | 0        |          |

|                            |                 |                |   |          |          |
|----------------------------|-----------------|----------------|---|----------|----------|
| L2a1a+16189C+7337A         | West Africa     | North America  | 1 | 0        |          |
| L2a1a+16390A               | West Africa     | North America  | 1 | 0        |          |
| L2a1a1                     | West Africa     | North America  | 8 | 1.25     | 0.612372 |
| L2a1a1+16129A              | West Africa     | North America  | 1 | 0        |          |
| L2a1a2                     | West Africa     | Europe         | 3 | 0.333333 | 0.333333 |
| L2a1a2                     | East Africa     | Southwest Asia | 4 | 0.5      | 0.353553 |
| L2a1a2                     | West Africa     | North America  | 4 | 1        | 0.5      |
| L2a1a2+16093C              | West Africa     | North America  | 1 | 0        |          |
| L2a1a2+16274A              | West Africa     | Europe         | 1 | 0        |          |
| L2a1a2+16274A              | West Africa     | Europe         | 1 | 0        |          |
| L2a1a2+7562G               | West Africa     | North America  | 1 | 0        |          |
| L2a1a2a                    | West Africa     | North America  | 1 | 0        |          |
| L2a1a2a1                   | West Africa     | North America  | 1 | 0        |          |
| L2a1a2a1a                  | West Africa     | North America  | 5 | 1.2      | 0.565685 |
| L2a1a2a1a+16092C           | Southern Africa | North Africa   | 1 | 0        |          |
| L2a1a2a1a+16092C           | Southern Africa | Southwest Asia | 1 | 0        |          |
| L2a1a2a1a+16286T           | West Africa     | North Africa   | 2 | 3        | 1.224745 |
| L2a1a2b                    | West Africa     | North America  | 3 | 1.666667 | 1        |
| L2a1a2c                    | West Africa     | South America  | 1 | 0        |          |
| L2a1a2c+16286T             | West Africa     | North America  | 1 | 0        |          |
| L2a1a2c+16309G             | West Africa     | Southwest Asia | 2 | 0        | 0        |
| L2a1a2c+16309G             | West Africa     | North America  | 1 | 0        |          |
| L2a1a2c+207A               | West Africa     | North America  | 1 | 0        |          |
| L2a1a3                     | West Africa     | Europe         | 3 | 0.333333 | 0.333333 |
| L2a1a3                     | West Africa     | Europe         | 3 | 0.333333 | 0.333333 |
| L2a1a3+9007G+16093C+11399C | West Africa     | North America  | 1 | 0        |          |
| L2a1a3a+16093C             | West Africa     | North America  | 1 | 0        |          |
| L2a1a3b                    | West Africa     | North America  | 1 | 0        |          |

|                            |                 |                |   |          |          |
|----------------------------|-----------------|----------------|---|----------|----------|
| L2a1b                      | West Africa     | North America  | 1 | 0        |          |
| L2a1b+143A                 | West Africa     | Europe         | 1 | 0        |          |
| L2a1b+143A                 | West Africa     | Europe         | 1 | 0        |          |
| L2a1b+143A                 | West Africa     | North America  | 3 | 1.333333 | 0.816497 |
| L2a1b+143A+195C            | West Africa     | North America  | 1 | 0        |          |
| L2a1b+16192T               | West Africa     | North Africa   | 1 | 0        |          |
| L2a1b1+16192T+12007A+8485A | West Africa     | North America  | 1 | 0        |          |
| L2a1b1+16192T+12130C       | West Africa     | North America  | 3 | 1.666667 | 1        |
| L2a1b1a+16192T             | East Africa     | Southwest Asia | 1 | 0        |          |
| L2a1c                      | West Africa     | Europe         | 4 | 3        | 1.118034 |
| L2a1c                      | West Africa     | Europe         | 4 | 3        | 1.118034 |
| L2a1c                      | West Africa     | North America  | 5 | 2.6      | 0.72111  |
| L2a1c+11614T               | West Africa     | North America  | 2 | 0        | 0        |
| L2a1c+16086C               | West Africa     | North America  | 1 | 0        |          |
| L2a1c+16129A               | West Africa     | Europe         | 1 | 0        |          |
| L2a1c+16129A               | West Africa     | Europe         | 1 | 0        |          |
| L2a1c+16129A               | East Africa     | Southwest Asia | 3 | 0        | 0        |
| L2a1c+200G                 | West Africa     | North America  | 1 | 0        |          |
| L2a1c+5147A+8222C          | Southern Africa | North America  | 1 | 0        |          |
| L2a1c+6164T                | West Africa     | North Africa   | 1 | 0        |          |
| L2a1c1                     | West Africa     | North Africa   | 1 | 0        |          |
| L2a1c1                     | West Africa     | North America  | 1 | 0        |          |
| L2a1c1+6173T               | West Africa     | Europe         | 1 | 0        |          |
| L2a1c1+6173T               | West Africa     | Europe         | 1 | 0        |          |
| L2a1c1+6173T+12361G        | Southern Africa | Europe         | 1 | 0        |          |
| L2a1c1+6173T+12361G        | Southern Africa | Europe         | 1 | 0        |          |
| L2a1c1a                    | West Africa     | South America  | 1 | 0        |          |
| L2a1c1a                    | East Africa     | North America  | 1 | 0        |          |



|                           |             |                |   |          |          |
|---------------------------|-------------|----------------|---|----------|----------|
| L2a1c2+7299G+644G         | West Africa | North America  | 1 | 0        |          |
| L2a1c2a                   | West Africa | North America  | 1 | 0        |          |
| L2a1c3a                   | West Africa | Europe         | 3 | 4.333333 | 1.20185  |
| L2a1c3a                   | West Africa | Europe         | 3 | 4.333333 | 1.20185  |
| L2a1c3a                   | West Africa | Southwest Asia | 3 | 0        | 0        |
| L2a1c3a1                  | West Africa | North America  | 2 | 0        | 0        |
| L2a1c3a1+13653T           | West Africa | North America  | 2 | 0        | 0        |
| L2a1c3b                   | West Africa | North America  | 1 | 0        |          |
| L2a1c3b1+16148T           | West Africa | Europe         | 1 | 0        |          |
| L2a1c3b1+16148T           | West Africa | Europe         | 1 | 0        |          |
| L2a1c4                    | West Africa | Europe         | 1 | 0        |          |
| L2a1c4                    | West Africa | Europe         | 1 | 0        |          |
| L2a1c4a                   | West Africa | North Africa   | 1 | 0        |          |
| L2a1c4a                   | West Africa | North America  | 1 | 0        |          |
| L2a1c4a1                  | West Africa | North America  | 4 | 1.25     | 0.559017 |
| L2a1c5                    | West Africa | North America  | 6 | 1        | 0.527046 |
| L2a1d                     | East Africa | North America  | 1 | 0        |          |
| L2a1d1                    | East Africa | Southwest Asia | 2 | 2.5      | 1.118034 |
| L2a1d1                    | East Africa | North America  | 4 | 0        | 0        |
| L2a1e                     | West Africa | North America  | 2 | 4        | 1.414214 |
| L2a1e1                    | West Africa | North America  | 2 | 0        | 0        |
| L2a1e1+143A               | West Africa | North America  | 4 | 2.75     | 1.089725 |
| L2a1e1+143A+5244G         | West Africa | North America  | 1 | 0        |          |
| L2a1f                     | West Africa | North America  | 6 | 1.5      | 0.5      |
| L2a1f+16193T              | West Africa | North America  | 1 | 0        |          |
| L2a1f1                    | West Africa | North America  | 5 | 1.2      | 0.489898 |
| L2a1f1+12753G             | West Africa | North America  | 1 | 0        |          |
| L2a1f1+12753G+6480A+8310C | East Africa | North America  | 1 | 0        |          |

|                      |                 |                |    |          |          |
|----------------------|-----------------|----------------|----|----------|----------|
| L2a1f1+14869A        | West Africa     | North America  | 3  | 0        | 0        |
| L2a1f1+16192T        | Southern Africa | North America  | 3  | 1.333333 | 0.666667 |
| L2a1f1a              | West Africa     | North America  | 1  | 0        |          |
| L2a1f2+16093C        | West Africa     | North America  | 3  | 1.666667 | 0.745356 |
| L2a1f3               | East Africa     | Southwest Asia | 4  | 0.5      | 0.5      |
| L2a1f3               | West Africa     | North America  | 1  | 0        |          |
| L2a1f3+16192T        | West Africa     | North America  | 12 | 0.666667 | 0.288675 |
| L2a1f3+16192T+16223T | West Africa     | Southwest Asia | 1  | 0        |          |
| L2a1g+195C           | Southern Africa | Southwest Asia | 2  | 0        | 0        |
| L2a1h                | East Africa     | Southwest Asia | 1  | 0        |          |
| L2a1i1               | West Africa     | North America  | 1  | 0        |          |
| L2a1i1+13708A+8987C  | West Africa     | North America  | 1  | 0        |          |
| L2a1i1+143A          | Southern Africa | North America  | 1  | 0        |          |
| L2a1j                | East Africa     | North Africa   | 1  | 0        |          |
| L2a1j                | East Africa     | Southwest Asia | 1  | 0        |          |
| L2a1l                | West Africa     | Europe         | 1  | 0        |          |
| L2a1l                | West Africa     | Europe         | 1  | 0        |          |
| L2a1l1a              | West Africa     | North Africa   | 1  | 0        |          |
| L2a1l1a              | West Africa     | South America  | 1  | 0        |          |
| L2a1l1a              | West Africa     | North America  | 2  | 1.5      | 0.866025 |
| L2a1l1a1             | West Africa     | North Africa   | 1  | 0        |          |
| L2a1l1a2+3345C       | West Africa     | North America  | 1  | 0        |          |
| L2a1l1b              | West Africa     | North America  | 2  | 1        | 0.707107 |
| L2a1l1b+7388G        | West Africa     | North America  | 1  | 0        |          |
| L2a1l2+143A          | West Africa     | North Africa   | 1  | 0        |          |
| L2a1l2+16192T        | West Africa     | North America  | 1  | 0        |          |
| L2a1l2a              | West Africa     | Europe         | 10 | 0.5      | 0.3      |
| L2a1l3               | West Africa     | North Africa   | 1  | 0        |          |

|                                    |                 |                |   |          |          |
|------------------------------------|-----------------|----------------|---|----------|----------|
| L2a1m                              | West Africa     | North America  | 1 | 0        |          |
| L2a1m1a                            | West Africa     | Europe         | 1 | 0        |          |
| L2a1m1a                            | West Africa     | North America  | 1 | 0        |          |
| L2a1m1a+16192T+153G+13326C         | West Africa     | North America  | 1 | 0        |          |
| L2a1n                              | West Africa     | South America  | 1 | 0        |          |
| L2a1n                              | West Africa     | North America  | 1 | 0        |          |
| L2a1n+16309G                       | West Africa     | North America  | 1 | 0        |          |
| L2a1o+3372C                        | West Africa     | Europe         | 1 | 0        |          |
| L2a1o+3372C                        | West Africa     | Southwest Asia | 1 | 0        |          |
| L2a5+3645T+511T+12967G+5246A+6893T | Southern Africa | Europe         | 2 | 0.5      | 0.5      |
| L2a5+3645T+511T+12967G+5246A+6893T | Southern Africa | Europe         | 2 | 0.5      | 0.5      |
| L2b1+16129A+3417T                  | West Africa     | Southwest Asia | 1 | 0        |          |
| L2b1a                              | West Africa     | Europe         | 3 | 6        | 1.825742 |
| L2b1a                              | West Africa     | Europe         | 3 | 6        | 1.825742 |
| L2b1a+207A                         | West Africa     | North Africa   | 2 | 7.5      | 1.936492 |
| L2b1a+7702A+8065A                  | West Africa     | North America  | 1 | 0        |          |
| L2b1a2                             | West Africa     | Southwest Asia | 3 | 0.666667 | 0.666667 |
| L2b1a2                             | West Africa     | North America  | 1 | 0        |          |
| L2b1a2+204C                        | West Africa     | North Africa   | 1 | 0        |          |
| L2b1a3                             | West Africa     | North Africa   | 1 | 0        |          |
| L2b1a3                             | West Africa     | Europe         | 1 | 0        |          |
| L2b1a3                             | West Africa     | North America  | 8 | 0.25     | 0.176777 |
| L2b1b+6629G+10586C                 | West Africa     | North Africa   | 1 | 0        |          |
| L2b1b+6629G+16153A                 | West Africa     | South America  | 1 | 0        |          |
| L2b2+183G                          | West Africa     | North America  | 1 | 0        |          |
| L2b2+183G+16274A                   | West Africa     | North America  | 1 | 0        |          |
| L2b2+3196A+15318T+513A             | West Africa     | North America  | 2 | 1        | 0.707107 |
| L2b2a+16354T                       | West Africa     | North America  | 4 | 1        | 0.612372 |

|                        |             |                |   |     |          |
|------------------------|-------------|----------------|---|-----|----------|
| L2b3a                  | West Africa | EUrope         | 1 | 0   |          |
| L2b3a                  | West Africa | EUrope         | 1 | 0   |          |
| L2b3a                  | West Africa | North America  | 1 | 0   |          |
| L2b3b                  | West Africa | North America  | 1 | 0   |          |
| L2b3c+185C             | West Africa | North America  | 1 | 0   |          |
| L2b3c+6293C+199C       | West Africa | North Africa   | 1 | 0   |          |
| L2b3c+6293C+199C       | West Africa | Southwest Asia | 1 | 0   |          |
| L2c+13470G+146C        | West Africa | North America  | 1 | 0   |          |
| L2c+16320T             | West Africa | Europe         | 5 | 0.8 | 0.489898 |
| L2c+16320T             | West Africa | Europe         | 4 | 1   | 0.612372 |
| L2c+198T+16177G        | West Africa | Europe         | 2 | 0.5 | 0.5      |
| L2c+198T+16177G        | West Africa | Europe         | 2 | 0.5 | 0.5      |
| L2c+198T+16177G        | West Africa | North America  | 1 | 0   |          |
| L2c+198T+16177G+16311C | West Africa | Europe         | 1 | 0   |          |
| L2c+198T+16177G+16311C | West Africa | Europe         | 1 | 0   |          |
| L2c+198T+8425G         | West Africa | North America  | 1 | 0   |          |
| L2c+6150A              | West Africa | North America  | 1 | 0   |          |
| L2c+6150A+64T          | West Africa | North America  | 3 | 1   | 0.57735  |
| L2c+95C+14750T         | West Africa | North America  | 1 | 0   |          |
| L2c+95C+14750T+8269A   | West Africa | North America  | 1 | 0   |          |
| L2c1                   | West Africa | North America  | 2 | 1.5 | 0.866025 |
| L2c1+3745A             | West Africa | North America  | 1 | 0   |          |
| L2c1a+13708A           | West Africa | North Africa   | 1 | 0   |          |
| L2c1a+13708A+3645C     | Morocco     | Europe         | 1 | 0   |          |
| L2c1a+13708A+3645C     | Morocco     | Europe         | 1 | 0   |          |
| L2c2                   | West Africa | Southwest Asia | 1 | 0   |          |
| L2c2                   | West Africa | North America  | 2 | 1   | 0.707107 |
| L2c2+14182C            | West Africa | North America  | 1 | 0   |          |

|                           |                 |                |   |          |          |
|---------------------------|-----------------|----------------|---|----------|----------|
| L2c2+16093C               | West Africa     | North America  | 1 | 0        |          |
| L2c2a                     | West Africa     | North America  | 3 | 1        | 0.57735  |
| L2c2a+198T                | West Africa     | North America  | 1 | 0        |          |
| L2c2a1                    | West Africa     | North America  | 1 | 0        |          |
| L2c2b1b                   | Southern Africa | Europe         | 1 | 0        |          |
| L2c2b1b                   | Southern Africa | North America  | 1 | 0        |          |
| L2c3+93G+146C             | West Africa     | North Africa   | 1 | 0        |          |
| L2c4                      | West Africa     | North America  | 1 | 0        |          |
| L2c5+13135A               | West Africa     | North America  | 1 | 0        |          |
| L2c5+14374C               | West Africa     | Europe         | 1 | 0        |          |
| L2c5+14374C               | West Africa     | Europe         | 1 | 0        |          |
| L2c5+5351G                | West Africa     | North America  | 1 | 0        |          |
| L2d+16129A                | West Africa     | North America  | 1 | 0        |          |
| L2d+16129A+11253C         | West Africa     | South America  | 1 | 0        |          |
| L2d+16129A+16093C         | West Africa     | North Africa   | 1 | 0        |          |
| L2d+16129A+199C           | North Africa    | North America  | 1 | 0        |          |
| L2d1+2223G                | West Africa     | North America  | 1 | 0        |          |
| L2d1a+16311C              | East Africa     | Southwest Asia | 1 | 0        |          |
| L2d1a+16311C              | Southern Africa | North America  | 1 | 0        |          |
| L2d1a+16311C+16093C+3197C | East Africa     | Southwest Asia | 2 | 0        | 0        |
| L2e1a+183G                | West Africa     | North America  | 1 | 0        |          |
| L3b1a                     | East Africa     | North Africa   | 2 | 5        | 1.581139 |
| L3b1a                     | East Africa     | North Africa   | 3 | 5.333333 | 1.763834 |
| L3b1a                     | East Africa     | North America  | 1 | 0        |          |
| L3b1a+11002G              | West Africa     | North Africa   | 1 | 0        |          |
| L3b1a+11002G+151T+2071C   | West Africa     | North Africa   | 1 | 0        |          |
| L3b1a+15311G+15758G       | West Africa     | North America  | 1 | 0        |          |
| L3b1a+15311G+8347G+372G   | West Africa     | North America  | 1 | 0        |          |

|                              |                 |                |   |          |          |
|------------------------------|-----------------|----------------|---|----------|----------|
| L3b1a+15311G+8347G+372G+152C | West Africa     | North Africa   | 1 | 0        |          |
| L3b1a+15434T+8772C           | West Africa     | North America  | 1 | 0        |          |
| L3b1a+15434T+8772C+16301T    | West Africa     | North America  | 1 | 0        |          |
| L3b1a+16093C                 | West Africa     | South America  | 1 | 0        |          |
| L3b1a+16093C                 | West Africa     | South America  | 1 | 0        |          |
| L3b1a+16311C+2775G           | Central Africa  | North Africa   | 1 | 0        |          |
| L3b1a+9055A+3866C+14781T     | West Africa     | North America  | 1 | 0        |          |
| L3b1a10                      | West Africa     | North America  | 1 | 0        |          |
| L3b1a10+14182T               | West Africa     | North America  | 1 | 0        |          |
| L3b1a11                      | Southern Africa | Southwest Asia | 1 | 0        |          |
| L3b1a11                      | Southern Africa | North America  | 2 | 0        | 0        |
| L3b1a1a+11800G               | East Africa     | Europe         | 3 | 1.333333 | 0.666667 |
| L3b1a1a+11800G               | East Africa     | Southwest Asia | 3 | 0.333333 | 0.333333 |
| L3b1a1a+11800G               | East Africa     | North America  | 3 | 0.666667 | 0.471405 |
| L3b1a1a+11800G+16093C        | East Africa     | Europe         | 1 | 0        |          |
| L3b1a1a+11800G+16093C        | East Africa     | Southwest Asia | 3 | 1.333333 | 0.666667 |
| L3b1a2                       | East Africa     | Southwest Asia | 4 | 5.25     | 1.299038 |
| L3b1a3                       | East Africa     | North Africa   | 3 | 2.666667 | 1.154701 |
| L3b1a3                       | North Africa    | North America  | 2 | 0        | 0        |
| L3b1a4                       | West Africa     | North Africa   | 1 | 0        |          |
| L3b1a4                       | West Africa     | Southwest Asia | 1 | 0        |          |
| L3b1a4                       | West Africa     | North America  | 1 | 0        |          |
| L3b1a4+16311C                | West Africa     | North America  | 1 | 0        |          |
| L3b1a5                       | West Africa     | North America  | 1 | 0        |          |
| L3b1a5+152C                  | West Africa     | North Africa   | 1 | 0        |          |
| L3b1a6                       | West Africa     | North America  | 1 | 0        |          |
| L3b1a6+13658T                | West Africa     | North America  | 1 | 0        |          |
| L3b1a7                       | West Africa     | North Africa   | 2 | 0        | 0        |

|                      |                 |                |   |     |          |
|----------------------|-----------------|----------------|---|-----|----------|
| L3b1a7+5211T         | West Africa     | North America  | 1 | 0   |          |
| L3b1a9               | West Africa     | North Africa   | 1 | 0   |          |
| L3b1a9a              | West Africa     | North Africa   | 1 | 0   |          |
| L3b1b+9079G+15664T   | West Africa     | North Africa   | 1 | 0   |          |
| L3b1b+9079G+15664T   | Southwest Asia  | Europe         | 1 | 0   |          |
| L3b1b+9079G+15664T   | West Africa     | Southwest Asia | 1 | 0   |          |
| L3b1b+9079G+6891G    | Southern Africa | North America  | 1 | 0   |          |
| L3b2+9299G           | West Africa     | North America  | 2 | 0   | 0        |
| L3b2a                | West Africa     | North Africa   | 1 | 0   |          |
| L3b2a+16311C         | West Africa     | North America  | 1 | 0   |          |
| L3b2b                | West Africa     | North America  | 1 | 0   |          |
| L3b3                 | West Africa     | North America  | 2 | 3   | 1.224745 |
| L3b3+185A            | West Africa     | Europe         | 1 | 0   |          |
| L3b3+185A            | West Africa     | North America  | 2 | 1   | 0.707107 |
| L3c                  | East Africa     | Southwest Asia | 1 | 0   |          |
| L3d                  | West Africa     | Europe         | 1 | 0   |          |
| L3d1'2'3'4'5'6+151T  | West Africa     | North America  | 2 | 1   | 0.707107 |
| L3d1'2'3'4'5'6+3504C | West Africa     | North America  | 2 | 1.5 | 0.866025 |
| L3d1a+4048A          | East Africa     | Southwest Asia | 1 | 0   |          |
| L3d1a1+150T          | Southern Africa | North America  | 1 | 0   |          |
| L3d1a1a              | Southern Africa | North America  | 1 | 0   |          |
| L3d1a1a+3666A        | East Africa     | Southwest Asia | 1 | 0   |          |
| L3d1a1a1             | Southern Africa | North America  | 2 | 1.5 | 0.866025 |
| L3d1a1a1+7765G       | East Africa     | North America  | 1 | 0   |          |
| L3d1a2+3796G+10463C  | Southern Africa | North America  | 1 | 0   |          |
| L3d1b1               | West Africa     | Europe         | 5 | 3   | 1.148913 |
| L3d1b1+150T          | West Africa     | Europe         | 1 | 0   |          |
| L3d1b1+150T          | West Africa     | Europe         | 1 | 0   |          |

|                                         |                 |                |   |   |          |
|-----------------------------------------|-----------------|----------------|---|---|----------|
| L3d1b1+150T+3459T+16093C                | West Africa     | Europe         | 1 | 0 |          |
| L3d1b1+150T+3459T+16093C                | West Africa     | Europe         | 1 | 0 |          |
| L3d1b1b                                 | West Africa     | Europe         | 1 | 0 |          |
| L3d1b2+4553C                            | West Africa     | North America  | 2 | 1 | 0.707107 |
| L3d1b3+146C+10694T                      | West Africa     | North America  | 1 | 0 |          |
| L3d1b3+146C+16256T+14040A               | West Africa     | Europe         | 3 | 1 | 0.745356 |
| L3d1b3+146C+16256T+14040A               | West Africa     | Europe         | 3 | 1 | 0.745356 |
| L3d1b3+146C+16256T+14040A+12616C+11239G | West Africa     | North America  | 1 | 0 |          |
| L3d1b3+146C+16256T+6446A                | West Africa     | North America  | 1 | 0 |          |
| L3d1c+9708C                             | West Africa     | North Africa   | 1 | 0 |          |
| L3d1c1                                  | West Africa     | North Africa   | 1 | 0 |          |
| L3d1c1                                  | West Africa     | North America  | 1 | 0 |          |
| L3d1d+8709T+13632G                      | Southern Africa | North America  | 1 | 0 |          |
| L3d2b+15115C                            | West Africa     | Southwest Asia | 1 | 0 |          |
| L3d2b+151T+263G+850C                    | West Africa     | North America  | 1 | 0 |          |
| L3d2b+2163G                             | West Africa     | North America  | 1 | 0 |          |
| L3d3a                                   | West Africa     | Europe         | 1 | 0 |          |
| L3d3a1+16304C                           | Southern Africa | North America  | 1 | 0 |          |
| L3d3a1a                                 | Southern Africa | Southwest Asia | 1 | 0 |          |
| L3d3b+15752C                            | East Africa     | Southwest Asia | 1 | 0 |          |
| L3d3b+15752C+6722A                      | Southern Africa | Europe         | 1 | 0 |          |
| L3d3b+15752C+6722A                      | Southern Africa | Europe         | 1 | 0 |          |
| L3d4                                    | West Africa     | North Africa   | 3 | 5 | 1.666667 |
| L3d4                                    | West Africa     | North America  | 3 | 0 | 0        |
| L3d4a+16124C                            | East Africa     | Southwest Asia | 1 | 0 |          |
| L3d6                                    | West Africa     | North America  | 1 | 0 |          |
| L3e1                                    | West Africa     | Europe         | 1 | 0 |          |
| L3e1                                    | West Africa     | Europe         | 1 | 0 |          |



|                      |                 |                |   |          |          |
|----------------------|-----------------|----------------|---|----------|----------|
| L3e1                 | West Africa     | Southwest Asia | 2 | 0        | 0        |
| L3e1                 | West Africa     | North America  | 1 | 0        |          |
| L3e1+189G            | Southwest Asia  | North America  | 1 | 0        |          |
| L3e1a+152C+16189C    | West Africa     | South America  | 1 | 0        |          |
| L3e1a1a+16311C       | East Africa     | Southwest Asia | 1 | 0        |          |
| L3e1a1a+16311C       | Southern Africa | South America  | 1 | 0        |          |
| L3e1a1a+16311C       | Southern Africa | North America  | 1 | 0        |          |
| L3e1a1a+16311C+8407T | Southern Africa | South America  | 1 | 0        |          |
| L3e1a2+4173G         | East Africa     | Southwest Asia | 1 | 0        |          |
| L3e1a3a              | Southern Africa | North America  | 2 | 0.5      | 0.5      |
| L3e1a3a+195C         | East Africa     | Southwest Asia | 1 | 0        |          |
| L3e1a3a+195C+207A    | East Africa     | Europe         | 1 | 0        |          |
| L3e1b1               | Central Africa  | Southwest Asia | 4 | 3        | 1.224745 |
| L3e1c                | Central Africa  | Southwest Asia | 1 | 0        |          |
| L3e1d1               | Southern Africa | North America  | 1 | 0        |          |
| L3e1e                | East Africa     | North America  | 2 | 4.5      | 1.5      |
| L3e1e+16309G         | West Africa     | North America  | 1 | 0        |          |
| L3e1e+73G            | East Africa     | North America  | 8 | 0.5      | 0.25     |
| L3e1f1a              | Southern Africa | North America  | 2 | 0        | 0        |
| L3e2a                | West Africa     | North Africa   | 3 | 3.666667 | 1.527525 |
| L3e2a                | West Africa     | North America  | 1 | 0        |          |
| L3e2a+189A           | West Africa     | North America  | 1 | 0        |          |
| L3e2a+9196A          | West Africa     | Europe         | 1 | 0        |          |
| L3e2a1a              | West Africa     | North America  | 3 | 0.666667 | 0.471405 |
| L3e2a1b              | West Africa     | North America  | 3 | 1        | 0.57735  |
| L3e2a1b+6167C        | West Africa     | North America  | 2 | 0        | 0        |
| L3e2a1b1+499A        | West Africa     | North Africa   | 2 | 0        | 0        |
| L3e2a1b1+499A        | West Africa     | South America  | 1 | 0        |          |

|                             |                 |                |    |          |          |
|-----------------------------|-----------------|----------------|----|----------|----------|
| L3e2a1b1+499A               | West Africa     | North America  | 10 | 0.9      | 0.387298 |
| L3e2a1b1+499A+14323A        | West Africa     | North America  | 1  | 0        |          |
| L3e2a1b1+499A+16311C        | West Africa     | North America  | 1  | 0        |          |
| L3e2a1b3                    | West Africa     | South America  | 1  | 0        |          |
| L3e2a1b3                    | West Africa     | North America  | 2  | 1.5      | 0.866025 |
| L3e2a2+709A                 | West Africa     | Southwest Asia | 1  | 0        |          |
| L3e2b                       | West Africa     | North Africa   | 3  | 6.333333 | 1.452966 |
| L3e2b                       | West Africa     | Europe         | 1  | 0        |          |
| L3e2b                       | West Africa     | Europe         | 1  | 0        |          |
| L3e2b                       | West Africa     | North America  | 1  | 0        |          |
| L3e2b+15253G                | Southern Africa | North America  | 1  | 0        |          |
| L3e2b+15287C                | Southern Africa | North America  | 1  | 0        |          |
| L3e2b+152C                  | West Africa     | North America  | 15 | 0.8      | 0.339935 |
| L3e2b+152C+146C             | West Africa     | North America  | 1  | 0        |          |
| L3e2b+152C+3606G+647G       | Southern Africa | North America  | 1  | 0        |          |
| L3e2b+152C+3606G+647G+4092A | WEST AFRICA     | North America  | 1  | 0        |          |
| L3e2b+15784C                | West Africa     | Europe         | 2  | 0.5      | 0.5      |
| L3e2b+1676G                 | North Africa    | Europe         | 1  | 0        |          |
| L3e2b+1676G                 | North Africa    | Europe         | 1  | 0        |          |
| L3e2b+5186G                 | Southern Africa | North America  | 1  | 0        |          |
| L3e2b+769A                  | West Africa     | Europe         | 1  | 0        |          |
| L3e2b+769A                  | West Africa     | Europe         | 1  | 0        |          |
| L3e2b+769A+146A             | West Africa     | North America  | 1  | 0        |          |
| L3e2b+769A+4164G            | Southern Africa | North America  | 1  | 0        |          |
| L3e2b+769A+4164G            | East Africa     | North America  | 1  | 0        |          |
| L3e2b1                      | West Africa     | North Africa   | 2  | 0        | 0        |
| L3e2b1                      | West Africa     | Europe         | 1  | 0        |          |
| L3e2b1                      | West Africa     | Europe         | 1  | 0        |          |

|                       |                 |                |   |      |          |
|-----------------------|-----------------|----------------|---|------|----------|
| L3e2b1+961C           | West Africa     | North America  | 1 | 0    |          |
| L3e2b1+961C+4496T     | West Africa     | North Africa   | 1 | 0    |          |
| L3e2b1a1              | West Africa     | North America  | 1 | 0    |          |
| L3e2b1a1+11722C       | West Africa     | North America  | 1 | 0    |          |
| L3e2b1a1+11722C+5210T | West Africa     | North America  | 4 | 2.25 | 1.145644 |
| L3e2b1a2              | West Africa     | North Africa   | 1 | 0    |          |
| L3e2b1a2+282C         | West Africa     | Europe         | 1 | 0    |          |
| L3e2b1a2+282C         | West Africa     | Europe         | 1 | 0    |          |
| L3e2b2                | West Africa     | Southwest Asia | 2 | 0    | 0        |
| L3e2b2+4560A+1694C    | West Africa     | North Africa   | 1 | 0    |          |
| L3e2b3                | West Africa     | North America  | 3 | 1    | 0.57735  |
| L3e2b4+11440A         | West Africa     | North America  | 1 | 0    |          |
| L3e2b4+8206A          | West Africa     | North America  | 1 | 0    |          |
| L3e2b8+8730G          | West Africa     | North America  | 3 | 0    | 0        |
| L3e3a                 | East Africa     | Southwest Asia | 6 | 1    | 0.707107 |
| L3e3a                 | Southern Africa | North America  | 2 | 0.5  | 0.5      |
| L3e3a+574C            | East Africa     | Southwest Asia | 1 | 0    |          |
| L3e3b                 | West Africa     | North America  | 5 | 0.4  | 0.282843 |
| L3e3b+16093C          | West Africa     | North America  | 2 | 1    | 0.707107 |
| L3e3b+16093C+16148T   | West Africa     | North America  | 1 | 0    |          |
| L3e3b+189G+16093C     | West Africa     | North America  | 1 | 0    |          |
| L3e3b1                | Southern Africa | South America  | 1 | 0    |          |
| L3e3b1                | Southern Africa | North America  | 1 | 0    |          |
| L3e3b1+16311C         | Southern Africa | South America  | 1 | 0    |          |
| L3e3b1+16325C         | Southern Africa | North America  | 1 | 0    |          |
| L3e3b3+195C           | West Africa     | North America  | 2 | 2    | 1        |
| L3e4                  | West Africa     | Southwest Asia | 1 | 0    |          |
| L3e4a                 | West Africa     | North America  | 1 | 0    |          |

|                               |                 |                |    |          |          |
|-------------------------------|-----------------|----------------|----|----------|----------|
| L3e4a+493G                    | Southern Africa | North America  | 1  | 0        |          |
| L3e4a+709A                    | West Africa     | North America  | 1  | 0        |          |
| L3e4a+8688C                   | West Africa     | Europe         | 1  | 0        |          |
| L3e4a+8688C                   | West Africa     | Europe         | 1  | 0        |          |
| L3e4a+8688C                   | West Africa     | North America  | 1  | 0        |          |
| L3e5                          | Central Africa  | North Africa   | 3  | 4        | 1.154701 |
| L3e5                          | North Africa    | Europe         | 1  | 0        |          |
| L3e5                          | North Africa    | Europe         | 1  | 0        |          |
| L3e5a                         | Central Africa  | North Africa   | 3  | 3        | 1.20185  |
| L3e5a                         | North Africa    | Europe         | 2  | 1        | 0.707107 |
| L3e5a                         | North Africa    | Europe         | 2  | 1        | 0.707107 |
| L3e5a                         | North Africa    | Southwest Asia | 1  | 0        |          |
| L3e5a+2833G                   | Central Africa  | North Africa   | 2  | 3        | 1.224745 |
| L3e5d                         | Central Africa  | North Africa   | 1  | 0        |          |
| L3f+152C+16311C               | East Africa     | North Africa   | 1  | 0        |          |
| L3f+152C+709A                 | East Africa     | Southwest Asia | 1  | 0        |          |
| L3f1b                         | West Africa     | Europe         | 7  | 2.857143 | 0.92582  |
| L3f1b                         | West Africa     | Europe         | 7  | 2.571429 | 0.989743 |
| L3f1b                         | West Africa     | North America  | 1  | 0        |          |
| L3f1b+16292T                  | West Africa     | North Africa   | 2  | 2.5      | 1.118034 |
| L3f1b+16292T                  | West Africa     | Europe         | 1  | 0        |          |
| L3f1b+16292T                  | East Africa     | Southwest Asia | 11 | 4.090909 | 0.922627 |
| L3f1b+16292T+13879C+10649C    | West Africa     | North Africa   | 1  | 0        |          |
| L3f1b+16292T+13879C+215G      | West Africa     | North America  | 2  | 0        | 0        |
| L3f1b+16292T+150T+207A        | West Africa     | North America  | 1  | 0        |          |
| L3f1b+16292T+150T+207A+10670T | West Africa     | South America  | 1  | 0        |          |
| L3f1b+16292T+150T+207A+10670T | West Africa     | North America  | 2  | 3        | 1.224745 |
| L3f1b+16292T+16295T           | West Africa     | Europe         | 1  | 0        |          |

|                                          |                 |                |    |          |          |
|------------------------------------------|-----------------|----------------|----|----------|----------|
| L3f1b+16292T+16295T                      | West Africa     | Europe         | 1  | 0        |          |
| L3f1b1a                                  | West Africa     | North America  | 13 | 0.538462 | 0.27735  |
| L3f1b1a+16189                            | West Africa     | North America  | 2  | 3        | 1.224745 |
| L3f1b1a+2080C                            | West Africa     | Europe         | 1  | 0        |          |
| L3f1b1a+272G                             | Southern Africa | North America  | 1  | 0        |          |
| L3f1b1a+272G+16295T                      | Southern Africa | North America  | 1  | 0        |          |
| L3f1b4                                   | Southern Africa | North America  | 2  | 0        | 0        |
| L3f1b4+16292T                            | Southern Africa | North America  | 2  | 2        | 1        |
| L3f1b4a1                                 | East Africa     | Southwest Asia | 1  | 0        |          |
| L3f1b4a1                                 | Southern Africa | North America  | 1  | 0        |          |
| L3f1b4c                                  | West Africa     | North America  | 2  | 1.5      | 0.866025 |
| L3f2a1a+13194A                           | East Africa     | Southwest Asia | 2  | 0.5      | 0.5      |
| L3f2b                                    | Southern Africa | North Africa   | 1  | 0        |          |
| L3h1a2+16270T                            | East Africa     | Southwest Asia | 3  | 7.333333 | 1.563472 |
| L3h1a2a+3892G                            | East Africa     | North Africa   | 1  | 0        |          |
| L3h1a2a1                                 | East Africa     | Southwest Asia | 1  | 0        |          |
| L3h1a2a1+16192T+152C                     | East Africa     | Southwest Asia | 1  | 0        |          |
| L3h1a2a1+16192T+5108C+723G               | East Africa     | Southwest Asia | 1  | 0        |          |
| L3h1b1                                   | East Africa     | North Africa   | 1  | 0        |          |
| L3h1b1a+14950T+513A                      | East Africa     | Southwest Asia | 1  | 0        |          |
| L3h1b1a+14950T+513A+9776T                | East Africa     | Southwest Asia | 1  | 0        |          |
| L3h1b1a+2831A+16215G+9827T+11563T        | West Africa     | Europe         | 1  | 0        |          |
| L3h1b1a+2831A+16215G+9827T+11563T        | West Africa     | Europe         | 1  | 0        |          |
| L3h1b1a+2831A+16215G+9827T+11563T+16126C | West Africa     | North America  | 1  | 0        |          |
| L3h1b1a+6359G                            | Central Africa  | North Africa   | 1  | 0        |          |
| L3h1b1a+6359G+152C                       | North Africa    | Europe         | 1  | 0        |          |
| L3h1b1a+6359G+152C                       | North Africa    | Europe         | 1  | 0        |          |
| L3h1b2                                   | West Africa     | Southwest Asia | 1  | 0        |          |

|                               |                 |                |   |          |          |
|-------------------------------|-----------------|----------------|---|----------|----------|
| L3h1b2+606G+151T+13194A+152C  | Southern Africa | North Africa   | 1 | 0        |          |
| L3h1b2+606G+151T+13194A+7424G | West Africa     | North Africa   | 2 | 5.5      | 1.658312 |
| L3h2+7805A                    | East Africa     | Southwest Asia | 6 | 3.833333 | 1.142609 |
| L3i1a+11914A+15743A           | East Africa     | Southwest Asia | 2 | 2.5      | 1.118034 |
| L3i1b                         | East Africa     | Southwest Asia | 3 | 6        | 1.885618 |
| L3i2+189G+200G+204C           | East Africa     | Southwest Asia | 1 | 0        |          |
| L3i2+189G+5441G+12630A        | East Africa     | Southwest Asia | 3 | 3        | 1        |
| L3k                           | East Africa     | North Africa   | 2 | 10.5     | 2.291288 |
| L3k                           | North Africa    | North America  | 1 | 0        |          |
| L3k1+152C                     | West Africa     | North America  | 2 | 0        | 0        |
| L3k1+152C+14013G              | East Africa     | Southwest Asia | 1 | 0        |          |
| L3x1                          | East Africa     | Southwest Asia | 1 | 0        |          |
| L3x1+152C                     | East Africa     | Southwest Asia | 1 | 0        |          |
| L3x1a1                        | East Africa     | Southwest Asia | 2 | 8.5      | 2.061553 |
| L3x1b+204C                    | East Africa     | Southwest Asia | 4 | 5.5      | 1.541104 |
| L3x1b1+199C                   | East Africa     | Southwest Asia | 1 | 0        |          |
| L3x2a+11063T                  | East Africa     | Southwest Asia | 2 | 0.5      | 0.5      |
| L3x2a1a                       | East Africa     | Southwest Asia | 3 | 3.666667 | 1.105542 |
| L3x2b                         | East Africa     | North Africa   | 2 | 6.5      | 1.802776 |
| L3x2b                         | North Africa    | Europe         | 4 | 2.5      | 0.790569 |
| L3x2b                         | North Africa    | Europe         | 4 | 2.5      | 0.790569 |
| L4a1a                         | East Africa     | Southwest Asia | 1 | 0        |          |
| L4a1a+16270                   | East Africa     | North Africa   | 1 | 0        |          |
| L4a1a+8631G+189G              | East Africa     | Southwest Asia | 1 | 0        |          |
| L4a1a+8631G+189G+150T+12280G  | East Africa     | Southwest Asia | 1 | 0        |          |
| L4a2                          | East Africa     | Southwest Asia | 4 | 6        | 1.936492 |
| L4b+5460A+73G                 | East Africa     | Europe         | 1 | 0        |          |
| L4b1a+709A+513A+496T+16365T   | West Africa     | Southwest Asia | 1 | 0        |          |

|                                            |             |                |   |          |          |
|--------------------------------------------|-------------|----------------|---|----------|----------|
| L4b2+152C+8227C+150T+12354C+200G           | West Africa | Europe         | 1 | 0        |          |
| L4b2+152C+8227C+150T+12354C+200G           | West Africa | Europe         | 1 | 0        |          |
| L4b2a+195C+152C+7241G                      | East Africa | Southwest Asia | 3 | 0        | 0        |
| L4b2a+6260A+1694C+16172C+391C+5483G+10325A | East Africa | Southwest Asia | 1 | 0        |          |
| L4b2a+6260A+1694C+16172C+5048C             | East Africa | Southwest Asia | 2 | 1.5      | 0.866025 |
| L4b2a+6260A+1694C+16172C+6956C+16287T      | East Africa | Southwest Asia | 1 | 0        |          |
| L4b2a+6260A+1694C+2483C+257G               | East Africa | Southwest Asia | 3 | 4        | 1.154701 |
| L5a1a+5004C                                | East Africa | Southwest Asia | 3 | 3.333333 | 1.414214 |
| L5a1b+204C+13224C                          | East Africa | Southwest Asia | 1 | 0        |          |
| L5b1a                                      | East Africa | Southwest Asia | 2 | 5.5      | 1.658312 |
| L5b1b                                      | East Africa | North Africa   | 1 | 0        |          |
| L6a+207A+195C                              | East Africa | Southwest Asia | 3 | 0        | 0        |
| L6a+207A+7145T                             | East Africa | North Africa   | 1 | 0        |          |
| L6b                                        | East Africa | Southwest Asia | 2 | 5.5      | 1.658312 |
