# Supplementary material for: Phylogeography of Sub-Saharan Mitochondrial Lineages Outside Africa Highlights the Roles of the Holocene Climate Changes and the Atlantic Slave Trade
Source: MDPI journal article supplement (doi:10.3390/ijms23169219), 2022-08-16
Supplement: s1 [file s1]

Table S1. List of samples used in this study.

| Sample ID | Haplogroup | Country      |
|-----------|------------|--------------|
| AF346967  | L3e3b2     | Unknown      |
| AF346968  | L1c1a1a1a  | Unknown      |
| AF346969  | L1c1a2b    | Unknown      |
| AF346976  | L2a1i1     | Unknown      |
| AF346977  | L2a1a2     | Unknown      |
| AF346980  | L3e1e1     | Unknown      |
| AF346985  | L0a1a2     | Unknown      |
| AF346986  | L1b1a3     | Unknown      |
| AF346987  | L1c1d1     | Unknown      |
| AF346992  | L1c2a1a    | Unknown      |
| AF346994  | L3e2b7     | Unknown      |
| AF346995  | L2c3a      | Unknown      |
| AF346996  | L1c1a2b    | Unknown      |
| AF346997  | L1c1a1a1a  | Unknown      |
| AF346998  | L0a2b      | Unknown      |
| AF346999  | L0a2b      | Unknown      |
| AF347000  | L3h1a2a1   | Unknown      |
| AF347008  | L0k1a1a    | Unknown      |
| AF347009  | L0k1a1c    | Unknown      |
| AF347014  | L3d1a1a    | Unknown      |
| AF347015  | L3e2b1a1   | Unknown      |
| AF381981  | L2c1a      | Mauritania   |
| AF381988  | L0a1b1     | Morocco      |
| AF381991  | L3b1a      | Mauritania   |
| AF381992  | L1c3a      | Mauritania   |
| AF381994  | L1b1a5     | Mauritania   |
| AF381998  | L3d3b      | Jordan       |
| AM711903  | L0a2b      | Unknown      |
| AM711904  | L0d1c1a1a  | Unknown      |
| AY195766  | L2b1a3     | South Africa |
| AY195776  | L2a1f      | South Africa |
| AY195777  | L0d2a1a    | South Africa |
| AY195780  | L0a1a2     | South Africa |
| AY195782  | L3d1d      | South Africa |
| AY195783  | L1b1a4a    | South Africa |
| DQ304925  | L2a1a1     | USA          |
| DQ304926  | L2a1a      | USA          |
| DQ304927  | L2a1a2c    | USA          |
| DQ304928  | L2a1a      | USA          |
| DQ304929  | L2a1e1     | USA          |
| DQ304930  | L2a1e1     | USA          |
| DQ304931  | L2a1e1     | USA          |
| DQ304932  | L2a1a      | USA          |
| DQ304933  | L2a1a1     | USA          |
| DQ304934  | L2a1f1a    | USA          |
| DQ304935  | L2a1f      | USA          |
| DQ304936  | L2a1f      | USA          |
| DQ304937  | L2a1f1     | USA          |
| DQ304938  | L2a1m1a    | USA          |
| DQ304939  | L2a1l1a    | USA          |
| DQ304940  | L2a1m1     | USA          |
| DQ304941  | L2a1n      | USA          |
| DQ304942  | L2a1c4a    | USA          |
| DQ304943  | L2a1c4a    | USA          |
| DQ304944  | L2a1c      | USA          |
| DQ304945  | L2a1e      | USA          |
| DQ304946  | L2a1e1     | USA          |
| DQ304947  | L2a1e1     | USA          |
| DQ304948  | L2a1a3b    | USA          |
| DQ304949  | L2a1c      | USA          |
| DQ304950  | L2a1c4a1   | USA          |
| DQ304951  | L2a1c4a1   | USA          |
| DQ304952  | L2a1f      | USA          |
| DQ304953  | L2a1f      | USA          |
| DQ304954  | L2a1f      | USA          |
| DQ304955  | L2a1f1     | USA          |
| DQ304956  | L2a1f      | USA          |
| DQ304957  | L2a1f2     | USA          |
| DQ304958  | L2a1f1a    | USA          |
| DQ304959  | L2a1f      | USA          |
| DQ304960  | L2a1f1     | USA          |
| DQ304961  | L2a1f1     | USA          |
| DQ304962  | L2a1f      | USA          |
| DQ305001  | L3e2b+152  | USA          |
| DQ305002  | L3e2b+152  | USA          |
| DQ305003  | L3e2b+152  | USA          |
| DQ305004  | L3e2b+152  | USA          |
| DQ305005  | L3e2b+152  | USA          |
| DQ305006  | L3e2b+152  | USA          |
| DQ305007  | L3e2b+152  | USA          |
| DQ305008  | L3e2b3     | USA          |
| DQ305009  | L3e2b3     | USA          |
| DQ305010  | L3e3b      | USA          |
| DQ305011  | L3e3b      | USA          |
| DQ305012  | L3e3a      | USA          |
| DQ305013  | L3e3b1     | USA          |
| DQ305014  | L3e3a      | USA          |
| DQ305015  | L3e3b      | USA          |
| DQ305016  | L3e3b      | USA          |

|          |           |                    |          |                |              |
|----------|-----------|--------------------|----------|----------------|--------------|
| DQ305017 | L3e3b1    | USA                | EF184623 | L3d1a1a        | Tanzania     |
| DQ305018 | L3e2b8    | USA                | EF184624 | L3h1a2         | Tanzania     |
| DQ305019 | L3e2b8    | USA                | EF184625 | L3a1a          | Tanzania     |
| DQ305020 | L3e2b8    | USA                | EF184627 | L4b2a2         | Tanzania     |
| DQ305021 | L3e2b1a1  | USA                | EF184628 | L3d1a1a1       | Tanzania     |
| DQ305022 | L3e2b1    | USA                | EF184629 | L4b2a1         | Tanzania     |
| DQ305023 | L3e2b1a1  | USA                | EF184630 | L3a1a          | Tanzania     |
| DQ305024 | L3e2a1b1  | USA                | EF184631 | L3h1a2a1       | Tanzania     |
| DQ305025 | L3e2a1b3  | USA                | EF184632 | L3h1a2a1       | Tanzania     |
| DQ305026 | L3e2a1a   | USA                | EF184633 | L4b2a2c        | South Africa |
| DQ305027 | L3e2a1a   | USA                | EF184639 | L4b2a2         | Tanzania     |
| DQ305028 | L3e2a1b1  | USA                | EF184640 | L4b2a2b        | Tanzania     |
| DQ305029 | L3e2a1b   | USA                | EF184641 | L3d1a1a        | Tanzania     |
| DQ305030 | L3e2a1b1  | USA                | EF556166 | L3h1a2a1       | Israel       |
| DQ305031 | L3e2a1b1  | USA                | EU092677 | L3e3a          | Israel       |
| DQ305032 | L3f1b1a   | USA                | EU092678 | L4a1a          | Israel       |
| DQ305033 | L3f1b1a   | USA                | EU092679 | L2a1+143+16189 | Israel       |
| DQ305034 | L3f1b1a   | USA                | EU092680 | L3f1b+16292    | Israel       |
| DQ305035 | L3f1b1a   | USA                | EU092681 | L3e1b1         | Israel       |
| DQ305036 | L3f1b1a   | USA                | EU092682 | L3b1b1         | Israel       |
| DQ341058 | L0a2a2a   | Dominican Republic | EU092683 | L2a1c+16129    | Israel       |
| DQ341059 | L1c2b1a'b | Ethiopia           | EU092684 | L3x2a1a        | Israel       |
| EF184599 | L0f2a     | Tanzania           | EU092685 | L3e1           | Israel       |
| EF184600 | L0f       | Tanzania           | EU092686 | L6b            | Israel       |
| EF184601 | L0a1c1    | Tanzania           | EU092687 | L2a1l2a        | Israel       |
| EF184602 | L0a2      | Tanzania           | EU092688 | L0a1b1a1       | Mozambique   |
| EF184603 | L0a2a1a   | Tanzania           | EU092689 | L1c3b1b        | Mozambique   |
| EF184604 | L0a2      | Tanzania           | EU092690 | L2a1b1a        | Mozambique   |
| EF184605 | L0a2a2a   | Tanzania           | EU092691 | L2a1a2         | Mozambique   |
| EF184606 | L0a2      | Tanzania           | EU092692 | L2b2           | Mozambique   |
| EF184607 | L0a2      | Tanzania           | EU092693 | L3e1d1a        | Mozambique   |
| EF184608 | L0a2      | Tanzania           | EU092694 | L3b1a11        | Mozambique   |
| EF184609 | L0k1a1    | South Africa       | EU092695 | L3e4a          | Mozambique   |
| EF184610 | L0k1a1b   | South Africa       | EU092696 | L3f1b1a        | Mozambique   |
| EF184611 | L0k1a1a   | South Africa       | EU092697 | L2c2           | Mozambique   |
| EF184612 | L1c3b1a   | Tanzania           | EU092698 | L3e1b2         | Mozambique   |
| EF184613 | L1c1a2b   | Cameroon           | EU092699 | L5a2           | Mozambique   |
| EF184614 | L1c1a2b   | Cameroon           | EU092700 | L0d2a1         | Mozambique   |
| EF184615 | L1c1a2b   | Cameroon           | EU092701 | L0a2a2a        | Mozambique   |
| EF184616 | L1c1a1a1a | Cameroon           | EU092702 | L3d1a1a        | Mozambique   |
| EF184617 | L2a1c5    | Tanzania           | EU092703 | L1c3a          | Mozambique   |
| EF184618 | L2a1+143  | Tanzania           | EU092704 | L3f1b4c        | Mozambique   |
| EF184619 | L2a1+143  | Tanzania           | EU092705 | L2a1b1a        | Mozambique   |
| EF184620 | L2a1+143  | Tanzania           | EU092706 | L3e3a          | Mozambique   |
| EF184621 | L2d1a     | Tanzania           | EU092707 | L1c2a1a        | Mozambique   |
| EF184622 | L3h1a2    | Tanzania           | EU092708 | L0d2c1         | Mozambique   |

|          |                |               |          |           |              |
|----------|----------------|---------------|----------|-----------|--------------|
| EU092709 | L3e1a3a        | Mozambique    | EU092831 | L0d1c3    | South Africa |
| EU092710 | L2c2b1b        | Netherlands   | EU092832 | L0d1c1a1b | South Africa |
| EU092711 | L2a1a3         | Portugal      | EU092833 | L0d1a1b   | South Africa |
| EU092712 | L1c2b1c        | Portugal      | EU092834 | L0d1c2    | South Africa |
| EU092713 | L1b1a3a        | Portugal      | EU092835 | L0d2a1    | South Africa |
| EU092714 | L0a1a1         | Guinea-Bissau | EU092836 | L1c1d1    | South Africa |
| EU092753 | L3h1a2b        | Lebanon       | EU092837 | L0k1a1    | South Africa |
| EU092754 | L2c2           | Lebanon       | EU092838 | L4b2a2c   | South Africa |
| EU092755 | L1b1a15        | Jordan        | EU092839 | L0d2a1a   | South Africa |
| EU092756 | L2a1j          | Jordan        | EU092840 | L0d2b2    | South Africa |
| EU092757 | L3e1           | Jordan        | EU092841 | L0d1b2b2a | South Africa |
| EU092758 | L3f1b2a        | Jordan        | EU092842 | L0d3b1    | South Africa |
| EU092759 | L3b1a4         | Jordan        | EU092843 | L0d1c1a1a | South Africa |
| EU092760 | L0a1c1         | Iran          | EU092844 | L0d2c1a1  | South Africa |
| EU092761 | L2a1b          | Egypt         | EU092845 | L0d2c1a1  | South Africa |
| EU092762 | L3d1c          | Egypt         | EU092846 | L0d2a1a   | South Africa |
| EU092763 | L0a1a+200      | Egypt         | EU092847 | L3e1a2    | South Africa |
| EU092764 | L0a1a          | Egypt         | EU092848 | L1c2a3    | South Africa |
| EU092765 | L2a1d1         | Egypt         | EU092849 | L1c2b1b   | South Africa |
| EU092766 | L2b1           | Egypt         | EU092850 | L1c2a3    | South Africa |
| EU092767 | L3b1a+@16124   | Egypt         | EU092851 | L3d3a1a   | South Africa |
| EU092768 | L3b1a+@16124   | Egypt         | EU092852 | L1b1a10b  | South Africa |
| EU092769 | L3e2a          | Egypt         | EU092853 | L0k1a2    | South Africa |
| EU092770 | L3f2b          | Egypt         | EU092854 | L2b1a3    | South Africa |
| EU092771 | L3f1b+16292    | Egypt         | EU092855 | L0k1a2    | South Africa |
| EU092772 | L3h1a2b        | Egypt         | EU092856 | L0d1c1a1a | South Africa |
| EU092773 | L6a            | Egypt         | EU092857 | L3f1b1a1  | South Africa |
| EU092774 | L5b1b          | Egypt         | EU092858 | L0a1b1a1  | South Africa |
| EU092775 | L1b1a2a        | Egypt         | EU092859 | L0d1c1a1b | South Africa |
| EU092776 | L3e5           | Egypt         | EU092860 | L0d1c1a1b | South Africa |
| EU092777 | L3e2b2         | Egypt         | EU092861 | L0a2a1b   | South Africa |
| EU092778 | L2a1a2a1a      | Egypt         | EU092862 | L3e1d1    | South Africa |
| EU092779 | L3b1a1a        | Kuwait        | EU092863 | L0d1a1a3  | South Africa |
| EU092780 | L4b2a2b        | Kuwait        | EU092864 | L1c2a2    | South Africa |
| EU092781 | L5a1a          | Kuwait        | EU092865 | L3f1b4a   | South Africa |
| EU092782 | L2a1+143+16189 | Oman          | EU092866 | L1c3a     | South Africa |
| EU092783 | L2a1f          | Oman          | EU092905 | L2a1a3a   | Chad         |
| EU092784 | L3e2b2         | Oman          | EU092906 | L0a4      | Chad         |
| EU092785 | L3e2b2         | Oman          | EU092907 | L3e3a     | Chad         |
| EU092786 | L0f2b          | Oman          | EU092908 | L3d1a1a   | Kenya        |
| EU092787 | L0a2a2a        | Oman          | EU092909 | L0a1b1a1  | Kenya        |
| EU092788 | L3i2           | Oman          | EU092910 | L2a1b1a   | Kenya        |
| EU092789 | L3e3a          | Oman          | EU092911 | L0a2a1a2  | Kenya        |
| EU092790 | L3e1a3a        | Oman          | EU092912 | L3f1b4a1  | Kenya        |
| EU092829 | L2a1a2a1a      | Tunisia       | EU092913 | L0a2d     | Kenya        |
| EU092830 | L3d1c1         | Tunisia       | EU092914 | L2a1h     | Kenya        |

|          |                 |              |
|----------|-----------------|--------------|
| EU092915 | L3e1e1          | Kenya        |
| EU092916 | L2a1a           | Kenya        |
| EU092917 | L3e2b           | Kenya        |
| EU092918 | L3b1a+152       | Kenya        |
| EU092919 | L2a1b1a         | Jordan       |
| EU092920 | L3x2a1a         | Jordan       |
| EU092921 | L0d3a           | Kuwait       |
| EU092922 | L2a1+143+@16309 | Kuwait       |
| EU092923 | L3i1b           | Kuwait       |
| EU092924 | L6a             | Saudi Arabia |
| EU092925 | L0a2a2a         | Yemen        |
| EU092926 | L3e2a2          | Yemen        |
| EU092927 | L2a1d1          | Oman         |
| EU092928 | L1b1a5          | Tunisia      |
| EU092929 | L1b1a5          | Egypt        |
| EU092930 | L3b1a1a         | Cyprus       |
| EU092931 | L3b1a1a         | Cyprus       |
| EU092932 | L3d1a1a1        | Pakistan     |
| EU092933 | L2a1a2          | Pakistan     |
| EU092934 | L5b1a           | Pakistan     |
| EU092935 | L4a2            | Pakistan     |
| EU092936 | L0b             | Ethiopia     |
| EU092937 | L2a1m1          | Ethiopia     |
| EU092938 | L4b2a2a         | Ethiopia     |
| EU092939 | L2a1d1          | Ethiopia     |
| EU092940 | L1b1a2a         | Ethiopia     |
| EU092941 | L3a2a           | Ethiopia     |
| EU092942 | L4b2a1          | Ethiopia     |
| EU273484 | L1c1a1a2        | Cameroon     |
| EU273485 | L1c1a1a1b1      | Cameroon     |
| EU273486 | L1c1d1          | Gabon        |
| EU273487 | L1c1a2b         | Gabon        |
| EU273488 | L1c3b1a         | Gabon        |
| EU273489 | L1c6            | Gabon        |
| EU273490 | L1c1a1a1a       | Gabon        |
| EU273491 | L1c1a1b         | Gabon        |
| EU273492 | L1c1a1a1b       | Gabon        |
| EU273493 | L1c3c           | Gabon        |
| EU273494 | L1c1a1a1b       | Gabon        |
| EU273495 | L1c1a1a1b       | Gabon        |
| EU273496 | L1c1a2a1        | Gabon        |
| EU273497 | L1c1a1a1b       | Gabon        |
| EU273498 | L1c1a1a1a       | Gabon        |
| EU273499 | L1c1b1          | Gabon        |
| EU273500 | L1c1a1a2        | Cameroon     |
| EU273501 | L1c2a2          | Cameroon     |

|          |                |               |
|----------|----------------|---------------|
| EU273502 | L1c4a          | Gabon         |
| EU547188 | L2a1l2a        | Poland        |
| EU564850 | L2a1l2a1       | unknown       |
| EU597489 | L1c1a2a1       | Congo         |
| EU597490 | L3b1a1a        | Kenya         |
| EU597491 | L2a1+143+16189 | Israel        |
| EU597500 | L3d5a          | Nigeria       |
| EU597501 | L1c1a1a1b1     | Congo         |
| EU597502 | L0d1b2b2b1     | Africa        |
| EU597512 | L3d2b          | Nigeria       |
| EU597513 | L1c1a1a1b      | Congo         |
| EU597514 | L0d1a1a1       | Africa        |
| EU597525 | L2a2b1a        | Congo         |
| EU597526 | L3d3a1a        | South Africa  |
| EU597537 | L0a2b          | Africa        |
| EU597549 | L2a2b1a        | Congo         |
| EU597561 | L2a1f3         | Kenya         |
| EU597570 | L2d+16129      | Latin America |
| EU597572 | L1c2a1a        | Congo         |
| EU935434 | L0a1b1a        | Egypt         |
| FJ625855 | L3f3a          | Chad          |
| FJ625856 | L3f3           | Chad          |
| FJ625857 | L3f3b          | Chad          |
| FJ625858 | L3f3b          | Chad          |
| FJ625859 | L3f3b          | Chad          |
| FJ625860 | L3f1b+16292    | Chad          |
| FJ713601 | L1c1d1         | Unknown       |
| FJ769771 | L2a1l1a        | Bahamas       |
| GU056815 | L3e1           | USA           |
| GU455415 | L3f1b5         | Morocco       |
| GU455416 | L3e2b          | Morocco       |
| GU455417 | L3d4           | Morocco       |
| GU455418 | L3h1b2         | Morocco       |
| GU455419 | L3f            | Morocco       |
| GU455420 | L3d4           | Morocco       |
| GU455421 | L3b1           | Morocco       |
| GU455422 | L3f1b5         | Morocco       |
| HG00554  | L1b1a3         | Puerto Rico   |
| HG00740  | L1b1a7a        | Puerto Rico   |
| HG01063  | L3e2b+152      | Puerto Rico   |
| HG01073  | L3e1e2         | Puerto Rico   |
| HG01080  | L1c3b1a        | Puerto Rico   |
| HG01095  | L3e1e2         | Puerto Rico   |
| HG01108  | L0a1a2         | Puerto Rico   |
| HG01170  | L3e1e2         | Puerto Rico   |
| HG01176  | L1b1a3         | Puerto Rico   |

|         |              |              |
|---------|--------------|--------------|
| HG01188 | L2b1a3       | Puerto Rico  |
| HG01286 | L2a1l1b      | Puerto Rico  |
| HG01323 | L3e1e2       | Puerto Rico  |
| HG01326 | L3e1e2       | Puerto Rico  |
| HG01362 | L3b1a+@16124 | Colombia     |
| HG01363 | L2a1a2c      | Colombia     |
| HG01365 | L3e1a        | Colombia     |
| HG01378 | L1c3b1       | Colombia     |
| HG01389 | L1c3a1b      | Colombia     |
| HG01403 | L2b1a        | Puerto Rico  |
| HG01414 | L3e2b3       | Puerto Rico  |
| HG02585 | L3d2b        | Gambia       |
| HG02586 | L3d1b1b      | Gambia       |
| HG02588 | L2a1a        | Gambia       |
| HG02589 | L1b1a        | Gambia       |
| HG02594 | L3b1a        | Gambia       |
| HG02595 | L2b          | Gambia       |
| HG02610 | L3d1         | Gambia       |
| HG02611 | L1c1c        | Gambia       |
| HG02613 | L3b1         | Gambia       |
| HG02614 | L3h1b2       | Gambia       |
| HG02620 | L2a1l2       | Gambia       |
| HG02623 | L3b1         | Gambia       |
| HG02624 | L2c          | Gambia       |
| HG02628 | L3d1b1       | Gambia       |
| HG02629 | L2a1l2       | Gambia       |
| HG02634 | L3b2b        | Gambia       |
| HG02635 | L1b1a14      | Gambia       |
| HG02642 | L2c          | Gambia       |
| HG02643 | L2c5         | Gambia       |
| HG02645 | L2b          | Gambia       |
| HG02646 | L1b1a+189    | Gambia       |
| HG02666 | L3e4a        | Gambia       |
| HG02667 | L2c5         | Gambia       |
| HG02675 | L3d3a        | Gambia       |
| HG02676 | L2a1a3       | Gambia       |
| HG02678 | L1b2         | Gambia       |
| HG02679 | L2a1c        | Gambia       |
| HG02702 | L3d1b1       | Gambia       |
| HG02703 | L2c          | Gambia       |
| HG02715 | L2c5         | Gambia       |
| HG02716 | L2a1l2       | Gambia       |
| HG02721 | L3b1a9a      | Gambia       |
| HG02722 | L3b2a        | Gambia       |
| HG02756 | L2c4         | Gambia       |
| HG02757 | L2c4         | Gambia       |
| HG02759 | L2c1         | Gambia       |
| HG02760 | L2b1a        | Gambia       |
| HG02768 | L3d1b1       | Gambia       |
| HG02922 | L2a1a1       | Nigeria      |
| HG02923 | L3f1b1a      | Nigeria      |
| HG02938 | L3e2a        | Nigeria      |
| HG02941 | L2a1a2a1a    | Nigeria      |
| HG02943 | L3e3b        | Nigeria      |
| HG02944 | L3e2a1b1     | Nigeria      |
| HG02946 | L3f1b3       | Nigeria      |
| HG02947 | L3e1a3b      | Nigeria      |
| HG02952 | L2b1b        | Nigeria      |
| HG02953 | L3d2b        | Nigeria      |
| HG02968 | L3e2b+152    | Nigeria      |
| HG02970 | L2d1a        | Nigeria      |
| HG02971 | L0a1a2       | Nigeria      |
| HG02973 | L3e2b1a2     | Nigeria      |
| HG02974 | L1b1a3       | Nigeria      |
| HG02976 | L3e1a        | Nigeria      |
| HG02977 | L2a1a3c      | Nigeria      |
| HG02979 | L2a1f        | Nigeria      |
| HG02981 | L0a1a2       | Nigeria      |
| HG02982 | L2b1a        | Gambia       |
| HG02983 | L1c3a1a      | Gambia       |
| HG03024 | L3h1b2       | Gambia       |
| HG03025 | L3e4a1       | Gambia       |
| HG03027 | L3e2a3       | Gambia       |
| HG03039 | L3b1a+@16124 | Gambia       |
| HG03040 | L3d1b1       | Gambia       |
| HG03045 | L3h1b2       | Gambia       |
| HG03046 | L2b1a2       | Gambia       |
| HG03048 | L2c1a        | Gambia       |
| HG03049 | L2c          | Gambia       |
| HG03052 | L1b1a4       | Sierra Leone |
| HG03054 | L3b1         | Sierra Leone |
| HG03055 | L3b1         | Sierra Leone |
| HG03057 | L1b1a        | Sierra Leone |
| HG03058 | L1b1a14      | Sierra Leone |
| HG03061 | L3e2b1a      | Sierra Leone |
| HG03063 | L0a1a+200    | Sierra Leone |
| HG03064 | L2a1i        | Sierra Leone |
| HG03133 | L1c2b1c      | Nigeria      |
| HG03135 | L2a1f1       | Nigeria      |
| HG03136 | L1b1a3       | Nigeria      |
| HG03139 | L4b2b        | Nigeria      |
| HG03157 | L2c2a1       | Nigeria      |

|          |                 |                          |
|----------|-----------------|--------------------------|
| HG03159  | L2a1f           | Nigeria                  |
| HG03160  | L3e2b8          | Nigeria                  |
| HG03162  | L3f1b+16292+150 | Nigeria                  |
| HG03163  | L2a1f1          | Nigeria                  |
| HG03166  | L1b1a3b         | Nigeria                  |
| HG03168  | L1c2a1          | Nigeria                  |
| HG03169  | L2a1a3c         | Nigeria                  |
| HG03172  | L3f1b1a         | Nigeria                  |
| HG03175  | L3e2a1b1        | Nigeria                  |
| HG03189  | L4b2b           | Nigeria                  |
| HG03190  | L3e1a           | Nigeria                  |
| HG03193  | L3f1b1a         | Nigeria                  |
| HG03195  | L3e2b1          | Nigeria                  |
| HG03196  | L3e1            | Nigeria                  |
| HG03198  | L3d5a           | Nigeria                  |
| HG03199  | L2a1f           | Nigeria                  |
| HG03202  | L2a1b1          | Nigeria                  |
| HG03209  | L2e             | Sierra Leone             |
| HG03212  | L3e4a1          | Sierra Leone             |
| HG03224  | L3d2            | Sierra Leone             |
| HG03225  | L2c             | Sierra Leone             |
| HG03240  | L2e             | Gambia                   |
| HG03241  | L3d1a1b         | Gambia                   |
| HG03246  | L3b1a+@16124    | Gambia                   |
| HG03247  | L3d2a           | Gambia                   |
| HG03259  | L4b1a           | Gambia                   |
| HG03265  | L3d5a           | Nigeria                  |
| HG03267  | L0a1a2          | Nigeria                  |
| HG03268  | L0a1a2          | Nigeria                  |
| HG03270  | L1b1a18         | Nigeria                  |
| HG03271  | L1c2b1b         | Nigeria                  |
| HG03279  | L2d1            | Nigeria                  |
| HG03280  | L3e2b8          | Nigeria                  |
| HG03439  | L3f1b1          | Sierra Leone             |
| HG03442  | L1b1a10         | Sierra Leone             |
| HG03445  | L3d1'2'3'4'5'6  | Sierra Leone             |
| HG03446  | L3b1a           | Sierra Leone             |
| HG03449  | L2a1c2a         | Sierra Leone             |
| HG03451  | L2c             | Sierra Leone             |
| HG03452  | L2a1f           | Sierra Leone             |
| HG03455  | L2c             | Sierra Leone             |
| HG03457  | L2a1l1b         | Sierra Leone             |
| HG03458  | L4b1a           | Sierra Leone             |
| HG03460  | L2a1a1          | Sierra Leone             |
| HG03461  | L2a1i           | Sierra Leone             |
| HG03464  | L1c1c           | Sierra Leone             |
| HG03469  | L1b1a14         | Sierra Leone             |
| HG03470  | L1b1a14         | Sierra Leone             |
| HG03473  | L2c             | Sierra Leone             |
| HG03476  | L2c             | Sierra Leone             |
| HG03478  | L3e'i'k'x       | Sierra Leone             |
| HG03484  | L2c             | Sierra Leone             |
| HG03499  | L1c2a2          | Nigeria                  |
| HG03511  | L3e2b           | Nigeria                  |
| HG03514  | L2a1f           | Nigeria                  |
| HG03515  | L2b1a3          | Nigeria                  |
| HG03517  | L0a1a2          | Nigeria                  |
| HG03518  | L3d1c1          | Nigeria                  |
| HG03520  | L3e1            | Nigeria                  |
| HG03521  | L3b1a10         | Nigeria                  |
| HG03539  | L2a1a3          | Gambia                   |
| HG03547  | L2a1l           | Sierra Leone             |
| HG03548  | L2a1a1          | Sierra Leone             |
| HG03556  | L3e4a1          | Sierra Leone             |
| HG03557  | L2a1c3a         | Sierra Leone             |
| HG03558  | L3h1b1a         | Sierra Leone             |
| HG03559  | L3d1b1          | Sierra Leone             |
| HG03563  | L2a1a           | Sierra Leone             |
| HG03565  | L3b1a5          | Sierra Leone             |
| HG03567  | L3d1b3a         | Sierra Leone             |
| HG03571  | L2a1c3a         | Sierra Leone             |
| HM771145 | L1c1a1a1b1      | Cameroon                 |
| HM771146 | L1c1a1a1a       | Congo                    |
| HM771147 | L1c1a1a2        | Cameroon                 |
| HM771148 | L1c1a2a2        | Central African Republic |
| HM771149 | L1c1a2a1        | Central African Republic |
| HM771150 | L1c1a2b         | Central African Republic |
| HM771151 | L1c1a1a1a       | Central African Republic |
| HM771152 | L1c1a1a1a       | Central African Republic |
| HM771153 | L1c1a1a1a       | Central African Republic |
| HM771154 | L1c1a1a1b1      | Central African Republic |
| HM771155 | L1c1a1a1b1      | Central African Republic |
| HM771156 | L1c1a1a1a       | Central African Republic |
| HM771157 | L1c4b           | Central African Republic |
| HM771158 | L1c4b           | Central African Republic |
| HM771159 | L1c4b           | Central African Republic |

|          |            |                          |          |              |          |
|----------|------------|--------------------------|----------|--------------|----------|
| HM771160 | L0a2a1     | Central African Republic | JF812599 | L1c4b        | USA      |
| HM771161 | L0a2a1     | Central African Republic | JN204423 | L2a1l2a      | Poland   |
| HM771162 | L1b2a      | Gabon                    | JN214430 | L1b1a8       | Spain    |
| HM771163 | L1b1a3     | Gabon                    | JN214431 | L1b1a8       | Spain    |
| HM771164 | L1c1a2a2   | Gabon                    | JN214432 | L2a1c4       | Spain    |
| HM771165 | L1c1a1a1b1 | Gabon                    | JN214433 | L2c1a        | Spain    |
| HM771166 | L1c1d      | Gabon                    | JN214434 | L3f1b+16292  | Spain    |
| HM771167 | L1c3b1a    | Gabon                    | JN214435 | L1b1a8       | Spain    |
| HM771168 | L2a1a3c    | Congo                    | JN214436 | L2a1c6       | Spain    |
| HM771169 | L2a1c2a    | Congo                    | JN214437 | L1b1a12a     | Spain    |
| HM771170 | L3d2a      | Gabon                    | JN214438 | L1b1a        | Spain    |
| HM771171 | L3e1d      | Gabon                    | JN214440 | L2a1c3a      | Spain    |
| HM771172 | L3e1f1a    | Gabon                    | JN214441 | L1b1a8       | Spain    |
| HM771173 | L3e1a3a    | Gabon                    | JN214442 | L1b1a6       | Spain    |
| HM771174 | L3e2a1b2   | Gabon                    | JN214443 | L2b3b        | Spain    |
| HM771175 | L3e2a1b2   | Gabon                    | JN214444 | L1b1a5       | Spain    |
| HM771176 | L3e2a1b2   | Gabon                    | JN214446 | L3x2b        | Spain    |
| HM771177 | L3e2b+152  | Gabon                    | JN214447 | L1b1a16      | Spain    |
| HM771178 | L1c1a2b    | Central African Republic | JN655773 | L3x1a2       | Ethiopia |
| HM771179 | L1c1a2a2   | Central African Republic | JN655774 | L3a1b        | Ethiopia |
| HM771180 | L1c1a2a2   | Central African Republic | JN655775 | L3h1b1a      | Ethiopia |
| HM771181 | L1c1a1a1a  | Central African Republic | JN655776 | L3x2a        | Ethiopia |
| HM771182 | L1c1a1a1b  | Central African Republic | JN655777 | L3f1b+16292  | Ethiopia |
| HM771221 | L1c2b2     | Gabon                    | JN655778 | L3i2         | Ethiopia |
| HM771222 | L1c2b1a    | Gabon                    | JN655779 | L3x1a2       | Ethiopia |
| HM771223 | L1c2b2     | Gabon                    | JN655780 | L3i1a        | Ethiopia |
| HM771224 | L2a1c      | Congo                    | JN655781 | L3x1b        | Ethiopia |
| HM771225 | L2a1c5     | Congo                    | JN655782 | L3x1b        | Ethiopia |
| HM771226 | L2b1b      | Congo                    | JN655783 | L3f1b+16292  | Ethiopia |
| HM771227 | L3d1a1a    | Gabon                    | JN655784 | L3f          | Ethiopia |
| HM771228 | L3d1a2     | Gabon                    | JN655785 | L3i2         | Ethiopia |
| HM771229 | L3e2b1     | Gabon                    | JN655786 | L3x1+16311   | Ethiopia |
| HM771230 | L3e2b1     | Gabon                    | JN655787 | L3i2         | Ethiopia |
| HM771231 | L3e3b1     | Gabon                    | JN655788 | L3h1a2b      | Ethiopia |
| HM771232 | L3e3b2     | Gabon                    | JN655789 | L3k1         | Chad     |
| HM771233 | L4b2b1     | Unknown                  | JN655790 | L3b1a+152    | Chad     |
| HQ384199 | L2a5       | Spain                    | JN655791 | L3b1a9       | Chad     |
| HQ425328 | L3d2b      | USA                      | JN655792 | L3b1a+@16124 | Chad     |
| HQ425645 | L2a1a2c    | USA                      | JN655793 | L3d2b        | Chad     |
| HQ610935 | L4a        | Unknown                  | JN655794 | L3e1b1       | Chad     |
| HQ675033 | L3x2b      | Spain                    | JN655795 | L3e2b6       | Chad     |
| JF509360 | L1c3b1     | Western Sahara           | JN655796 | L3e3b        | Chad     |
| JF682349 | L3b1a1a    | USA                      | JN655797 | L3d3b        | Chad     |
|          |            |                          | JN655798 | L3e5a1a      | Chad     |
|          |            |                          | JN655799 | L3h1b1a      | Chad     |
|          |            |                          | JN655800 | L3d1a1a      | Somalia  |



|          |              |              |
|----------|--------------|--------------|
| JN655801 | L3h2         | Somalia      |
| JN655802 | L3x2a        | Somalia      |
| JN655803 | L3a+709      | Somalia      |
| JN655804 | L3i2         | Somalia      |
| JN655805 | L3a2a        | Somalia      |
| JN655806 | L3b1a+@16124 | Somalia      |
| JN655807 | L3e1a1a      | Somalia      |
| JN655808 | L3d1a1       | Somalia      |
| JN655809 | L3f1a1       | Somalia      |
| JN655810 | L3x1b        | Somalia      |
| JQ044795 | L1c3b2       | Burkina Faso |
| JQ044796 | L3b1a6       | Burkina Faso |
| JQ044797 | L2b2         | Burkina Faso |
| JQ044798 | L3b1a+152    | Burkina Faso |
| JQ044799 | L2a1c1a1     | Burkina Faso |
| JQ044800 | L2b1b        | Burkina Faso |
| JQ044801 | L3e2a1b1     | Burkina Faso |
| JQ044802 | L2a1c2       | Burkina Faso |
| JQ044804 | L2a1m        | Burkina Faso |
| JQ044805 | L3b1a        | Burkina Faso |
| JQ044806 | L1c3a        | Burkina Faso |
| JQ044808 | L1b1a17      | Burkina Faso |
| JQ044809 | L2a1a2       | Burkina Faso |
| JQ044810 | L2c3         | Burkina Faso |
| JQ044811 | L4b1a        | Burkina Faso |
| JQ044812 | L2a1a2       | Burkina Faso |
| JQ044813 | L2a1a3a      | Burkina Faso |
| JQ044814 | L3d1b3a      | Burkina Faso |
| JQ044815 | L3d1a1       | Burkina Faso |
| JQ044816 | L2e1         | Burkina Faso |
| JQ044817 | L2a1l1a1     | Burkina Faso |
| JQ044818 | L2a1a        | Burkina Faso |
| JQ044819 | L2a1a3b      | Burkina Faso |
| JQ044820 | L3b1a7a      | Burkina Faso |
| JQ044821 | L2a1e1       | Burkina Faso |
| JQ044822 | L2a1p        | Burkina Faso |
| JQ044823 | L2c4         | Burkina Faso |
| JQ044824 | L3d1c1       | Burkina Faso |
| JQ044825 | L1b1a15      | Burkina Faso |
| JQ044826 | L3b'f        | Burkina Faso |
| JQ044827 | L3e2b        | Burkina Faso |
| JQ044828 | L2a1c2a      | Burkina Faso |
| JQ044829 | L3d1d        | Burkina Faso |
| JQ044830 | L3e          | Burkina Faso |
| JQ044831 | L3f1b1       | Burkina Faso |
| JQ044832 | L3e2b        | Burkina Faso |
| JQ044833 | L2a1c4a      | Burkina Faso |
| JQ044834 | L4b1a        | Burkina Faso |
| JQ044873 | L3d1b2       | Burkina Faso |
| JQ044874 | L0a1a2       | Burkina Faso |
| JQ044875 | L1b1a3a1     | Burkina Faso |
| JQ044876 | L1b1a9       | Burkina Faso |
| JQ044877 | L2a1a        | Burkina Faso |
| JQ044878 | L2c2b2       | Burkina Faso |
| JQ044879 | L2a1a2       | Burkina Faso |
| JQ044880 | L3f1b+16292  | Burkina Faso |
| JQ044881 | L2a1i1       | Burkina Faso |
| JQ044882 | L2c2         | Burkina Faso |
| JQ044883 | L2a1f        | Burkina Faso |
| JQ044884 | L2a1a2       | Burkina Faso |
| JQ044885 | L2a1a        | Burkina Faso |
| JQ044886 | L1c3b2       | Burkina Faso |
| JQ044887 | L2c1a        | Burkina Faso |
| JQ044888 | L2a1a1       | Burkina Faso |
| JQ044889 | L1b1a        | Burkina Faso |
| JQ044890 | L2b1a2       | Burkina Faso |
| JQ044891 | L3d1b3a      | Burkina Faso |
| JQ044892 | L2a1a3       | Burkina Faso |
| JQ044893 | L0a1a1       | Burkina Faso |
| JQ044894 | L3f1b1       | Burkina Faso |
| JQ044895 | L3f1b1a      | Burkina Faso |
| JQ044897 | L2a1l1a2     | Burkina Faso |
| JQ044898 | L1b1a9       | Burkina Faso |
| JQ044899 | L3e2b        | Burkina Faso |
| JQ044900 | L3f1b+16292  | Burkina Faso |
| JQ044901 | L2c1a        | Burkina Faso |
| JQ044902 | L3b1a6       | Burkina Faso |
| JQ044903 | L0a1a+200    | Burkina Faso |
| JQ044905 | L2a1i        | Burkina Faso |
| JQ044906 | L3e2b+152    | Burkina Faso |
| JQ044907 | L1c3a        | Burkina Faso |
| JQ044908 | L2a1m1a      | Burkina Faso |
| JQ044909 | L2a1c1       | Burkina Faso |
| JQ044910 | L2b2         | Burkina Faso |
| JQ044911 | L2a1a        | Burkina Faso |
| JQ044912 | L2a1f        | Burkina Faso |
| JQ044955 | L2a1l1b      | Burkina Faso |
| JQ044956 | L2a1l1       | Burkina Faso |
| JQ044957 | L2a1c4a      | Burkina Faso |
| JQ044958 | L2a1i        | Burkina Faso |
| JQ044959 | L3d4         | Burkina Faso |
| JQ044960 | L3b1a+152    | Burkina Faso |



|          |                 |              |          |           |                  |
|----------|-----------------|--------------|----------|-----------|------------------|
| JQ044961 | L2a1a           | Burkina Faso | JQ045047 | L2a1l3    | Burkina Faso     |
| JQ044962 | L2a1c2          | Burkina Faso | JQ045048 | L2a1a2    | Burkina Faso     |
| JQ044963 | L3e2b2          | Burkina Faso | JQ045049 | L2e1      | Burkina Faso     |
| JQ044964 | L3e3b3          | Burkina Faso | JQ045050 | L2d       | Burkina Faso     |
| JQ044965 | L3b1a10         | Burkina Faso | JQ045051 | L3d1b3    | Burkina Faso     |
| JQ044966 | L2a1l1a         | Burkina Faso | JQ045052 | L3f1b1a   | Burkina Faso     |
| JQ044967 | L1c3b1b         | Burkina Faso | JQ045053 | L0a1a2    | Burkina Faso     |
| JQ044968 | L2a1a2a1        | Burkina Faso | JQ045054 | L2a1f     | Burkina Faso     |
| JQ044969 | L2a1c2a         | Burkina Faso | JQ045055 | L1b1a10   | Burkina Faso     |
| JQ044970 | L2a1e1          | Burkina Faso | JQ045056 | L2a1f     | Burkina Faso     |
| JQ044971 | L2c3            | Burkina Faso | JQ045057 | L3d2b     | Burkina Faso     |
| JQ044972 | L3e2b5          | Burkina Faso | JQ045058 | L3b1a6    | Burkina Faso     |
| JQ044973 | L2a1c+16086     | Burkina Faso | JQ045059 | L3d1b     | Burkina Faso     |
| JQ044974 | L2a1c1          | Burkina Faso | JQ045060 | L2a1a     | Burkina Faso     |
| JQ044975 | L2a1b2          | Burkina Faso | JQ045061 | L2a1f     | Burkina Faso     |
| JQ044976 | L2c             | Burkina Faso | JQ045062 | L2a1      | Burkina Faso     |
| JQ044977 | L2a1a1          | Burkina Faso | JQ045063 | L2a1c3b2  | Burkina Faso     |
| JQ044978 | L2a1l2          | Burkina Faso | JQ045064 | L2a1c1    | Burkina Faso     |
| JQ044979 | L3f1b+16292+150 | Burkina Faso | JQ045065 | L3d1b3    | Burkina Faso     |
| JQ044980 | L1b1a9          | Burkina Faso | JQ045066 | L2a1a1    | Burkina Faso     |
| JQ044981 | L2a1n           | Burkina Faso | JQ045067 | L2a1c4a   | Burkina Faso     |
| JQ044982 | L3e3b           | Burkina Faso | JQ045068 | L2c1a     | Burkina Faso     |
| JQ044983 | L2a1a           | Burkina Faso | JQ045069 | L2d+16129 | Burkina Faso     |
| JQ044984 | L2c5            | Burkina Faso | JQ045070 | L3e1g     | Burkina Faso     |
| JQ044985 | L3e2b1a         | Burkina Faso | JQ045109 | L2c3a     | Burkina Faso     |
| JQ044986 | L3b1a5          | Burkina Faso | JQ045110 | L2a1c3b1  | Burkina Faso     |
| JQ044987 | L2a1a2          | Burkina Faso | JQ045111 | L1b1a     | Burkina Faso     |
| JQ044988 | L3d1c1          | Burkina Faso | JQ045112 | L3d1b     | Burkina Faso     |
| JQ044989 | L2c1            | Burkina Faso | JQ045113 | L1b1a4a   | Burkina Faso     |
| JQ044990 | L3h1b2          | Burkina Faso | JQ045114 | L1b1a14   | Burkina Faso     |
| JQ044991 | L3e2a           | Burkina Faso | JQ045116 | L2a1c3b1  | Burkina Faso     |
| JQ044992 | L2a1a           | Burkina Faso | JQ045117 | L3d1d     | Burkina Faso     |
| JQ045033 | L3e2a1b3        | Burkina Faso | JQ045118 | L3e4a1    | Burkina Faso     |
| JQ045034 | L3b1a6          | Burkina Faso | JQ045119 | L1b1a     | Burkina Faso     |
| JQ045035 | L2a1c4a         | Burkina Faso | JQ045120 | L3b1a     | Burkina Faso     |
| JQ045036 | L1b1a           | Burkina Faso | JQ045121 | L1b1a17   | Burkina Faso     |
| JQ045037 | L2b1a2          | Burkina Faso | JQ045122 | L2a1c3b1  | Burkina Faso     |
| JQ045038 | L1b3            | Burkina Faso | JQ045123 | L3b1a     | Burkina Faso     |
| JQ045039 | L2a1f2          | Burkina Faso | JQ045124 | L2a1c1    | Burkina Faso     |
| JQ045040 | L2a1m           | Burkina Faso | JQ045125 | L3e4a1    | Burkina Faso     |
| JQ045041 | L3b1a+152       | Burkina Faso | JQ412577 | L2a1c1a2  | unknown          |
| JQ045042 | L2c2            | Burkina Faso | JQ701814 | L2a1f1    | USA              |
| JQ045043 | L2b2            | Burkina Faso | JQ701823 | L1b1a3b   | USA              |
| JQ045044 | L2d1            | Burkina Faso | JQ701829 | L3e2b1a2  | Africa           |
| JQ045045 | L2a1c4a         | Burkina Faso | JQ701833 | L2b1a3    | African European |
| JQ045046 | L2a1f3          | Burkina Faso | JQ701901 | L1c1c     | Unknown          |

|          |           |             |
|----------|-----------|-------------|
| JQ701914 | L2a1m1a   | Ireland     |
| JQ701926 | L2a1c4a   | unknown     |
| JQ701954 | L2c       | unknown     |
| JQ702015 | L2a1l2a1  | Poland      |
| JQ702047 | L3k1      | Unknown     |
| JQ702115 | L2c4      | unknown     |
| JQ702123 | L2b3a     | Hawaii      |
| JQ702169 | L2c       | unknown     |
| JQ702179 | L3e3b     | Unknown     |
| JQ702227 | L0a1a2    | Unknown     |
| JQ702241 | L3b1a10   | Unknown     |
| JQ702261 | L2a1c1a2  | unknown     |
| JQ702307 | L2a1c     | unknown     |
| JQ702326 | L0a1b1a1  | Unknown     |
| JQ702381 | L3b1a     | Africa      |
| JQ702420 | L3d1b2    | Unknown     |
| JQ704982 | L3e2a1a   | Unknown     |
| JQ705001 | L2a1c5    | unknown     |
| JQ705012 | L3e2b     | Unknown     |
| JQ705019 | L3d2b     | Unknown     |
| JQ705046 | L2a1c1a1  | Ghana       |
| JQ705049 | L2a1l2a   | Poland      |
| JQ705055 | L2a1a2a1a | Mozambique  |
| JQ705077 | L3d1b2    | Unknown     |
| JQ705087 | L2a1a     | unknown     |
| JQ705109 | L0a2a2a   | Unknown     |
| JQ705115 | L1b1a4    | USA         |
| JQ705120 | L2c       | unknown     |
| JQ705136 | L3e2a1b1  | Unknown     |
| JQ705137 | L3h1b1a   | Unknown     |
| JQ705145 | L2a1c3a1  | USA         |
| JQ705150 | L2a1f     | unknown     |
| JQ705185 | L2a1l2a   | Russia      |
| JQ705249 | L1b1a6    | Unknown     |
| JQ705250 | L2a1a2    | unknown     |
| JQ705275 | L1c1a     | Puerto Rico |
| JQ705285 | L3e4a     | Unknown     |
| JQ705310 | L3k1      | Unknown     |
| JQ705320 | L3e4a1    | Unknown     |
| JQ705361 | L3b1a     | Unknown     |
| JQ705410 | L3d2b     | Unknown     |
| JQ705455 | L2a1e1    | unknown     |
| JQ705478 | L1b1a6    | Unknown     |
| JQ705521 | L3e1f2    | Unknown     |
| JQ705529 | L2a1a3a   | unknown     |
| JQ705576 | L1c2b1c   | Unknown     |
| JQ705587 | L1b1a15a  | USA         |
| JQ705589 | L2a1l2a1  | Romania     |
| JQ705596 | L3e5b     | Unknown     |
| JQ705597 | L1c2b1c   | Unknown     |
| JQ705606 | L1b1a18   | Unknown     |
| JQ705626 | L2c3      | unknown     |
| JQ705650 | L1c2b1b1  | Mexico      |
| JQ705669 | L1b1a3a   | Unknown     |
| JX303768 | L1c1a2    | Zambia      |
| JX303769 | L1b1a10b  | Zambia      |
| JX303770 | L1b2a     | Zambia      |
| JX303771 | L1b1a3    | Zambia      |
| JX303772 | L0a2a2a2  | Zambia      |
| JX303773 | L1c2b1b1  | Zambia      |
| JX303774 | L3f1b1a1  | Zambia      |
| JX303775 | L1c2a1a   | Zambia      |
| JX303776 | L3e1      | Zambia      |
| JX303777 | L1b1a     | Zambia      |
| JX303778 | L0a2a2a   | Zambia      |
| JX303779 | L1b1a     | Zambia      |
| JX303780 | L2a1f1    | Zambia      |
| JX303781 | L3e1e1    | Zambia      |
| JX303782 | L1c2a3a   | Zambia      |
| JX303783 | L1c2a1a   | Zambia      |
| JX303784 | L0a2a1b   | Zambia      |
| JX303785 | L1c3b1a   | Zambia      |
| JX303786 | L0a2a2a2  | Zambia      |
| JX303787 | L1b1a3    | Zambia      |
| JX303788 | L0d2b2    | Zambia      |
| JX303789 | L3e2b1a2  | Zambia      |
| JX303790 | L1c2b1b1  | Zambia      |
| JX303791 | L0d1c2a   | Zambia      |
| JX303792 | L2c2a1    | Zambia      |
| JX303793 | L1c2a1a   | Zambia      |
| JX303794 | L1c2b1b1  | Zambia      |
| JX303795 | L2a1d2    | Zambia      |
| JX303796 | L0a1b1a1  | Zambia      |
| JX303797 | L1c5      | Zambia      |
| JX303798 | L2a1g     | Zambia      |
| JX303799 | L3e3b2    | Zambia      |
| JX303800 | L1c2b1b1  | Zambia      |
| JX303801 | L1b1a10b  | Zambia      |
| JX303802 | L3d3a1b   | Zambia      |
| JX303803 | L3d3a1b   | Zambia      |
| JX303804 | L3f1b1a1  | Zambia      |
| JX303805 | L2a1f3    | Zambia      |

|          |          |        |
|----------|----------|--------|
| JX303844 | L3e2b    | Zambia |
| JX303845 | L1c2b2   | Zambia |
| JX303846 | L1b1a10b | Zambia |
| JX303847 | L3e1d1   | Zambia |
| JX303848 | L1c2a1a  | Zambia |
| JX303849 | L3e1d1a  | Zambia |
| JX303850 | L3e1d1   | Zambia |
| JX303851 | L1c2b1b1 | Zambia |
| JX303852 | L2a1c1   | Zambia |
| JX303853 | L2a1i1   | Zambia |
| JX303854 | L3e1a3a  | Zambia |
| JX303855 | L1c2a1a  | Zambia |
| JX303856 | L0k2a1a  | Zambia |
| JX303857 | L2a1i1   | Zambia |
| JX303858 | L2a1b1a  | Zambia |
| JX303859 | L1b1a10b | Zambia |
| JX303860 | L1b1a10b | Zambia |
| JX303861 | L0k1b    | Zambia |
| JX303862 | L2a1d2   | Zambia |
| JX303863 | L2c2a1   | Zambia |
| JX303864 | L3d3a1   | Zambia |
| JX303865 | L0k1b    | Zambia |
| JX303866 | L1b1a10b | Zambia |
| JX303867 | L0k1b    | Zambia |
| JX303868 | L0k2a1a  | Zambia |
| JX303869 | L0a1a2   | Zambia |
| JX303870 | L2a1q    | Zambia |
| JX303871 | L1c3a1b  | Zambia |
| JX303872 | L3e1a3a  | Zambia |
| JX303873 | L2a1d2   | Zambia |
| JX303874 | L2a1b1a  | Zambia |
| JX303875 | L3e1d1   | Zambia |
| JX303876 | L3b1a3   | Zambia |
| JX303877 | L1c2a1a  | Zambia |
| JX303878 | L3e1a2   | Zambia |
| JX303879 | L1c2a1a  | Zambia |
| JX303880 | L2a1b1a  | Zambia |
| JX303881 | L3e1a3a  | Zambia |
| KC257337 | L1c3b2   | USA    |
| KC257338 | L1c3b2   | USA    |
| KC257339 | L1c3b2   | USA    |
| KC257340 | L1c3b2   | USA    |
| KC257341 | L1c3b2   | USA    |
| KC257342 | L1c3b2   | USA    |
| KC257343 | L1c3b2   | USA    |
| KC257344 | L1c3b2   | USA    |

|          |             |          |
|----------|-------------|----------|
| KC345764 | L0d1c       | Angola   |
| KC345765 | L0d1b1b1    | Angola   |
| KC345766 | L0d1b1b1    | Angola   |
| KC345767 | L0d1b1b1    | Angola   |
| KC345768 | L0d1b1b1    | Angola   |
| KC345769 | L0d1a1b1a   | Angola   |
| KC345770 | L0d1a1b1a   | Angola   |
| KC345771 | L0d1b1b1    | Angola   |
| KC345772 | L0d1b1b1    | Angola   |
| KC345773 | L0d1a1b1a   | Angola   |
| KC345774 | L0d1b1b1    | Angola   |
| KC345775 | L0d1a1b1a   | Angola   |
| KC345776 | L0d1a1b1a   | Angola   |
| KC345777 | L0d2a1a     | Angola   |
| KC345778 | L0d1c2      | Angola   |
| KC345779 | L0d1c       | Angola   |
| KC345780 | L0d1b1+@152 | Angola   |
| KC345781 | L0d1b2b2    | Angola   |
| KC345782 | L0d1a1b1a   | Angola   |
| KC345783 | L0d1b1b1    | Angola   |
| KC345784 | L0d2a1a     | Angola   |
| KC345785 | L0k1a2      | Angola   |
| KC345786 | L0d1b2a     | Botswana |
| KC345787 | L0d1b2a1    | Botswana |
| KC345788 | L0d1b1a1    | Botswana |
| KC345789 | L0d1b1a1    | Botswana |
| KC345790 | L0d1b1a1    | Botswana |
| KC345791 | L0d1a       | Botswana |
| KC345792 | L0d1c2      | Botswana |
| KC345793 | L0d1b1a1    | Botswana |
| KC345832 | L0d1a1a1    | Botswana |
| KC345833 | L0d1c1a2    | Botswana |
| KC345834 | L0d1c1a1a2  | Botswana |
| KC345835 | L0d1c1a1a1  | Botswana |
| KC345836 | L0d1c2a1    | Botswana |
| KC345837 | L0d1c1a2    | Botswana |
| KC345838 | L0d2b1a1a   | Botswana |
| KC345839 | L0d2b1a1a   | Botswana |
| KC345840 | L0d2b1a1a   | Botswana |
| KC345841 | L0d2b1a1a   | Botswana |
| KC345842 | L0d2b1a1    | Botswana |
| KC345843 | L0d2b1a1a   | Botswana |
| KC345844 | L0d2b1a1    | Botswana |
| KC345845 | L0d2b1a1a   | Botswana |
| KC345846 | L0d2b1a1a   | Botswana |
| KC345847 | L0d2b1a1a   | Botswana |

|          |            |          |          |            |          |
|----------|------------|----------|----------|------------|----------|
| KC345848 | L0d2b1a1a  | Botswana | KC345932 | L0d1c1a1a  | Botswana |
| KC345849 | L0d2b1a1a  | Botswana | KC345933 | L0d1c1a1   | Botswana |
| KC345850 | L0d2b1a1a  | Botswana | KC345934 | L0d1c1a1a  | Botswana |
| KC345851 | L0k1a2     | Botswana | KC345935 | L0d1c1a1a  | Botswana |
| KC345852 | L0d1c2a    | Botswana | KC345936 | L0d1c1a1b  | Botswana |
| KC345853 | L0d1c1a1a1 | Botswana | KC345937 | L0d1b2b1a  | Botswana |
| KC345854 | L0d1c1a2   | Botswana | KC345938 | L0d1c2a1   | Botswana |
| KC345855 | L0d1a1a1   | Botswana | KC345939 | L0d1c1a1a1 | Botswana |
| KC345856 | L0d1c1a1a1 | Botswana | KC345940 | L0d1c1a2   | Botswana |
| KC345857 | L0d1c1a2   | Botswana | KC345941 | L0d1c1a2   | Botswana |
| KC345858 | L0d1c1a1a1 | Botswana | KC345942 | L0d1c1a2   | Botswana |
| KC345859 | L0d1c1a1a1 | Botswana | KC345943 | L0d1b2b1a  | Botswana |
| KC345860 | L0d1c1a1a1 | Botswana | KC345944 | L0d1c3     | Botswana |
| KC345861 | L0d1c1a1a1 | Botswana | KC345945 | L0d1c1a1a1 | Botswana |
| KC345862 | L0d1c1a1a1 | Botswana | KC345984 | L0d1c2a    | Botswana |
| KC345863 | L0d1c1a1a1 | Botswana | KC345985 | L0d1c      | Botswana |
| KC345864 | L0d1a1a1   | Botswana | KC345986 | L0d1c2a    | Botswana |
| KC345865 | L0d2a1a1a  | Botswana | KC345987 | L0d2a1a1   | Botswana |
| KC345866 | L0d2a1a    | Botswana | KC345988 | L0d2a1a1a  | Botswana |
| KC345867 | L0d1b2b1a  | Botswana | KC345989 | L0d2a1a1   | Botswana |
| KC345868 | L0d1b2b2c1 | Botswana | KC345990 | L0d2a1b    | Botswana |
| KC345869 | L0d1b2a1   | Botswana | KC345991 | L0d2a1b    | Botswana |
| KC345908 | L0d1b2b1a  | Botswana | KC345992 | L0d2a1a1a  | Botswana |
| KC345909 | L0d1b1a1   | Botswana | KC345993 | L0d2a1a1a  | Botswana |
| KC345910 | L0d2a2     | Botswana | KC345994 | L0d1c1a1a2 | Botswana |
| KC345911 | L0d2a1a1   | Botswana | KC345995 | L0d1c1a2   | Botswana |
| KC345912 | L0d2b1a1a  | Botswana | KC345996 | L0d1c1a2   | Botswana |
| KC345913 | L0k1a1d    | Botswana | KC345997 | L0d1c1a1a  | Botswana |
| KC345914 | L0k1a1     | Botswana | KC345998 | L0d1c1a1a1 | Botswana |
| KC345915 | L0k1a1     | Botswana | KC345999 | L0d1c1a1a  | Botswana |
| KC345916 | L0k1a1d    | Botswana | KC346000 | L0d1c1a1a1 | Botswana |
| KC345917 | L0d1c      | Botswana | KC346001 | L0d1c1a2   | Botswana |
| KC345918 | L0d1b1a1   | Botswana | KC346002 | L0d1c1a1a1 | Botswana |
| KC345919 | L0d1c1a1a  | Botswana | KC346003 | L0d1c1a1a  | Botswana |
| KC345920 | L0d1c1     | Botswana | KC346004 | L0d2a1a1a  | Botswana |
| KC345921 | L0d1b2b2a  | Botswana | KC346005 | L0d2a1b    | Botswana |
| KC345922 | L0k2a1     | Botswana | KC346006 | L0d2a1a1   | Botswana |
| KC345923 | L0d1b2b1b  | Botswana | KC346007 | L0d2a1a1   | Botswana |
| KC345924 | L0d1b2b2   | Botswana | KC346008 | L0d2a1a1   | Botswana |
| KC345925 | L0d1b2a1   | Botswana | KC346009 | L0d2b1a1a  | Botswana |
| KC345926 | L0d1b2b1b  | Botswana | KC346010 | L0d2a1a1a  | Botswana |
| KC345927 | L0d2a1b    | Botswana | KC346011 | L0d2a1b    | Botswana |
| KC345928 | L0d2a1a3   | Botswana | KC346012 | L0d2a1a1   | Botswana |
| KC345929 | L0d2a1b    | Botswana | KC346013 | L0d1c1a1a2 | Botswana |
| KC345930 | L0d3b1     | Botswana | KC346014 | L0d1b2a1   | Botswana |
| KC345931 | L0d3b2     | Botswana | KC346015 | L0d1c2a1   | Botswana |

|          |            |          |
|----------|------------|----------|
| KC346016 | L0d1b1a1   | Botswana |
| KC346017 | L0d1c2a1   | Botswana |
| KC346018 | L0d1c2a1   | Botswana |
| KC346019 | L0d1c1a1a  | Botswana |
| KC346020 | L0d2a1a1   | Botswana |
| KC346021 | L0d2a1a1   | Botswana |
| KC346060 | L0d2c2a1a  | Botswana |
| KC346061 | L0d2a1a1   | Botswana |
| KC346062 | L0d2c2a1a  | Botswana |
| KC346063 | L0k1a1d    | Botswana |
| KC346064 | L0d1b2b2a  | Botswana |
| KC346065 | L0k1a2     | Botswana |
| KC346066 | L0d1b2a1   | Botswana |
| KC346067 | L0d1b2a1   | Botswana |
| KC346068 | L0d1c1a1a  | Botswana |
| KC346069 | L0d1b2a1   | Botswana |
| KC346070 | L0d1b2a1   | Botswana |
| KC346071 | L0d2b1a1a  | Botswana |
| KC346072 | L0k1a3     | Botswana |
| KC346073 | L0k1a3     | Botswana |
| KC346074 | L0d1b1a    | Botswana |
| KC346075 | L0d1c1a1a2 | Botswana |
| KC346076 | L0d1c1a2   | Botswana |
| KC346077 | L0d1c1a2   | Botswana |
| KC346078 | L0d1b1a    | Botswana |
| KC346079 | L0d1c1a2   | Botswana |
| KC346080 | L0d1c1a1a1 | Botswana |
| KC346081 | L0d1c2a1   | Botswana |
| KC346082 | L0d1c1a2   | Botswana |
| KC346083 | L0k1a2     | Botswana |
| KC346084 | L0d1c1a2   | Botswana |
| KC346085 | L0d1c1a1b  | Botswana |
| KC346086 | L0d2c1a    | Botswana |
| KC346087 | L0d2a1a    | Botswana |
| KC346088 | L0d1c1a1a  | Botswana |
| KC346089 | L0d1c1a1a  | Botswana |
| KC346090 | L0d2a1     | Botswana |
| KC346091 | L0d2a1a3   | Botswana |
| KC346092 | L0d1a1c    | Namibia  |
| KC346093 | L0d1b2b2c2 | Namibia  |
| KC346094 | L0d1c1a1b  | Namibia  |
| KC346095 | L0d1c1a1a  | Namibia  |
| KC346096 | L0d1c1a1b  | Namibia  |
| KC346097 | L0d1c1a1a  | Namibia  |
| KC346136 | L0d1b2b2c1 | Namibia  |
| KC346137 | L0d1c1a1b  | Namibia  |

|          |            |         |
|----------|------------|---------|
| KC346138 | L0d1b2b1b  | Namibia |
| KC346139 | L0d1b2b2c1 | Namibia |
| KC346140 | L0d1c1a1b  | Namibia |
| KC346141 | L0d1b2b2c2 | Namibia |
| KC346142 | L0d1c1a1b  | Namibia |
| KC346143 | L0d1b2b2c2 | Namibia |
| KC346144 | L0d1c1a    | Namibia |
| KC346145 | L0d2a1a1   | Namibia |
| KC346146 | L0d2c2     | Namibia |
| KC346147 | L0d2b1b    | Namibia |
| KC346148 | L0d3b1     | Namibia |
| KC346149 | L0k1a1     | Namibia |
| KC346150 | L0k1a1     | Namibia |
| KC346151 | L0d1b2b1b  | Namibia |
| KC346152 | L0d1b2a1   | Namibia |
| KC346153 | L0d1c1a1a  | Namibia |
| KC346154 | L0d2b1b    | Namibia |
| KC346155 | L0d2b1b    | Namibia |
| KC346156 | L0d2c1b    | Namibia |
| KC346157 | L0d2c1a    | Namibia |
| KC346158 | L0d2c1b    | Namibia |
| KC346159 | L0k1a1     | Namibia |
| KC346160 | L0k1a1c    | Namibia |
| KC346161 | L0k1a1     | Namibia |
| KC346162 | L0k1a1a    | Namibia |
| KC346163 | L0d1b2b2b1 | Namibia |
| KC346164 | L0d1b2b1b  | Namibia |
| KC346165 | L0d1b2b2b1 | Namibia |
| KC346166 | L0d1c1a1b  | Namibia |
| KC346167 | L0d2b1b    | Namibia |
| KC346168 | L0d2a1a    | Namibia |
| KC346169 | L0d2b1b    | Namibia |
| KC346170 | L0d1b2b2c1 | Namibia |
| KC346171 | L0d1b2a1   | Namibia |
| KC346172 | L0d1c1a1b  | Namibia |
| KC346173 | L0d1b2b2a  | Namibia |
| KC346212 | L0d1c1a1b  | Namibia |
| KC346213 | L0d1b2b2b1 | Namibia |
| KC346214 | L0d1b2b2a  | Namibia |
| KC346215 | L0d1b2a1   | Namibia |
| KC346216 | L0d1b2b2a  | Namibia |
| KC346217 | L0d2c2a    | Namibia |
| KC346218 | L0d2c2b    | Namibia |
| KC346219 | L0d2c2b    | Namibia |
| KC346220 | L0d2a1a    | Namibia |
| KC346221 | L0d2a1a3   | Namibia |

|          |            |              |
|----------|------------|--------------|
| KC346222 | L0d2c1a    | Namibia      |
| KC346223 | L0d2d      | Namibia      |
| KC346224 | L0d3b2     | Namibia      |
| KC346225 | L0d1a1b1b  | Namibia      |
| KC346226 | L0d1a1a    | Namibia      |
| KC346227 | L0d1a1a3   | Namibia      |
| KC346228 | L0d1a1a3   | Namibia      |
| KC346229 | L0d3b1     | Namibia      |
| KC346230 | L0k1b      | Namibia      |
| KC346231 | L0d1c1a1a2 | Namibia      |
| KC346232 | L0d1c1a1a  | Namibia      |
| KC346233 | L0k2a      | Zambia       |
| KC346234 | L0d1b1c    | Zambia       |
| KC346235 | L0d1b1b1   | Zambia       |
| KC346236 | L0d1b1c    | Zambia       |
| KC346237 | L0d1c2     | Zambia       |
| KC346238 | L0d1c2     | Zambia       |
| KC346239 | L0d1c2     | Zambia       |
| KC346240 | L0d2a2     | Zambia       |
| KC346241 | L0k1b      | Zambia       |
| KC346242 | L0k2b      | Zambia       |
| KC346243 | L0d1b1c    | Zambia       |
| KC346244 | L0d1b1b1   | Zambia       |
| KC346245 | L0d1b2a2   | Zambia       |
| KC346246 | L0d1c2     | Zambia       |
| KC346247 | L0d1b2b2b  | Zambia       |
| KC346248 | L0d1b1b1   | Zambia       |
| KC533452 | L3e1a1a    | South Africa |
| KC533506 | L3e1a1a    | South Africa |
| KC533508 | L2a1b1a    | South Africa |
| KC533509 | L0a2a2a    | South Africa |
| KC533510 | L0d2a1     | South Africa |
| KC533512 | L3e1b2     | South Africa |
| KC533513 | L2b2a      | South Africa |
| KC533514 | L1c1       | South Africa |
| KC533516 | L0d2a1a    | South Africa |
| KC533518 | L3e1b2     | South Africa |
| KC622055 | L3e3b1     | Botswana     |
| KC622056 | L0a2a2a    | Botswana     |
| KC622057 | L2a1b1a    | Botswana     |
| KC622058 | L3f2a1     | Botswana     |
| KC622059 | L3e1b2     | Botswana     |
| KC622060 | L1c2b1b1   | Botswana     |
| KC622061 | L3e1       | Botswana     |
| KC622062 | L2a1b1a    | Botswana     |
| KC622063 | L0a1b1a1   | Botswana     |
| KC622064 | L0a2a2a    | Botswana     |
| KC622065 | L0a2a1a2   | Botswana     |
| KC622066 | L2a1b1a    | Botswana     |
| KC622067 | L0a1b1a1   | Botswana     |
| KC622068 | L0a1b1a1   | Botswana     |
| KC622069 | L2a1a2     | Botswana     |
| KC622070 | L2a1a2     | Botswana     |
| KC622071 | L2a1b1a    | Botswana     |
| KC622072 | L2a1a2     | Botswana     |
| KC622073 | L3f1b1a    | Botswana     |
| KC622074 | L2a1d2     | Botswana     |
| KC622075 | L2c2b1b    | Botswana     |
| KC622076 | L2a1f      | Botswana     |
| KC622077 | L0a1b1a1   | Botswana     |
| KC622078 | L0a1b1a1   | Botswana     |
| KC622079 | L3e1a2     | Namibia      |
| KC622080 | L3d3a1a    | Namibia      |
| KC622081 | L3d3a1a    | Namibia      |
| KC622082 | L3f1b4a    | Namibia      |
| KC622083 | L3f1b4a    | Namibia      |
| KC622122 | L3d3a1a    | Namibia      |
| KC622123 | L3f1b4a    | Namibia      |
| KC622124 | L3d3a1a    | Namibia      |
| KC622125 | L1c1b      | Namibia      |
| KC622126 | L3d3a1     | Namibia      |
| KC622127 | L2b1a3     | Namibia      |
| KC622128 | L3e1a2     | Namibia      |
| KC622129 | L3d3a1     | Namibia      |
| KC622130 | L3e1a2     | Namibia      |
| KC622131 | L1b1a      | Namibia      |
| KC622132 | L3e3b1     | Namibia      |
| KC622133 | L1c3a1a    | Namibia      |
| KC622134 | L3d3a1a    | Namibia      |
| KC622135 | L3e1a2     | Namibia      |
| KC622136 | L3d3a1a    | Namibia      |
| KC622137 | L3d3a1a    | Namibia      |
| KC622138 | L3f1b4a    | Namibia      |
| KC622139 | L3f1b4a    | Namibia      |
| KC622140 | L3d3a1a    | Namibia      |
| KC622141 | L3d3a1a    | Namibia      |
| KC622142 | L3e1a2     | Namibia      |
| KC622143 | L3e1a2     | Namibia      |
| KC622144 | L3f1b4a    | Namibia      |
| KC622145 | L3e1a2     | Namibia      |
| KC622146 | L3d3a1a    | Namibia      |
| KC622147 | L3d3a1a    | Namibia      |

|          |          |          |
|----------|----------|----------|
| KC622148 | L3d3a1a  | Namibia  |
| KC622149 | L3d3a1a  | Namibia  |
| KC622150 | L0g      | Namibia  |
| KC622151 | L0g      | Namibia  |
| KC622152 | L3f1b1a1 | Namibia  |
| KC622153 | L3d3a1a  | Namibia  |
| KC622154 | L0a2a1a  | Namibia  |
| KC622155 | L1c2a3   | Namibia  |
| KC622156 | L3e1a2   | Namibia  |
| KC622157 | L3d3a1a  | Namibia  |
| KC622158 | L3f1b4a  | Namibia  |
| KC622159 | L2a1q    | Namibia  |
| KC622198 | L3d3a1a  | Namibia  |
| KC622199 | L3d3a1a  | Namibia  |
| KC622200 | L3d3a1a  | Namibia  |
| KC622201 | L3d3a1a  | Namibia  |
| KC622202 | L3e2b    | Namibia  |
| KC622203 | L3d3a1a  | Namibia  |
| KC622204 | L3d3a1a  | Namibia  |
| KC622205 | L3e1a2   | Namibia  |
| KC622206 | L3d3a1a  | Namibia  |
| KC622207 | L3d3a1a  | Namibia  |
| KC622208 | L3f1b4a  | Namibia  |
| KC622209 | L3d3a1a  | Namibia  |
| KC622210 | L3f1b4a  | Namibia  |
| KC622211 | L3d3a1a  | Namibia  |
| KC622212 | L3h1b2   | Namibia  |
| KC622213 | L3d3a1a  | Namibia  |
| KC622214 | L3d3a1a  | Namibia  |
| KC622215 | L4b2a2c  | Botswana |
| KC622216 | L3e2b    | Botswana |
| KC622217 | L3e2b    | Botswana |
| KC622218 | L4b2a2c  | Botswana |
| KC622219 | L3d3a1   | Botswana |
| KC622220 | L2a1f    | Botswana |
| KC622221 | L2b1a3   | Botswana |
| KC622222 | L0a1b1a1 | Botswana |
| KC622223 | L1b1a10b | Botswana |
| KC622224 | L3e1a2   | Botswana |
| KC622225 | L3d3a1b  | Botswana |
| KC622226 | L4b2a2c  | Botswana |
| KC622227 | L3e1e1   | Botswana |
| KC622228 | L3e2b3   | Botswana |
| KC622229 | L3d1a1a1 | Botswana |
| KC622230 | L3f1b4c  | Botswana |
| KC622231 | L1c2b1b1 | Botswana |

|          |             |                          |
|----------|-------------|--------------------------|
| KC622232 | L3e1e1      | Botswana                 |
| KC622233 | L1c2b1b1    | Botswana                 |
| KC622234 | L3e1e1      | Botswana                 |
| KC622235 | L3e1e1      | Botswana                 |
| KC911364 | L5b1a       | Iran                     |
| KC911395 | L2a1f3      | Iran                     |
| KC911506 | L3e3a       | Iran                     |
| KC911529 | L3d1a1a     | Iran                     |
| KC911533 | L3d1a1a     | Iran                     |
| KF011502 | L3f1b       | Spain                    |
| KF011503 | L3f1b       | Spain                    |
| KF055291 | L1b1a3      | USA                      |
| KF055293 | L3e2b8      | USA                      |
| KF055296 | L3d1a1a     | USA                      |
| KF055297 | L3d1b3      | USA                      |
| KF055298 | L1c3a       | USA                      |
| KF055299 | L2a1i1      | USA                      |
| KF055300 | L3e3b       | USA                      |
| KF055302 | L0a1a+200   | USA                      |
| KF055303 | L1b1a10     | USA                      |
| KF055304 | L3e2b+152   | USA                      |
| KF055305 | L1b1a       | USA                      |
| KF055306 | L3b1a       | USA                      |
| KF055307 | L3e2b+152   | USA                      |
| KF055308 | L3e1e       | USA                      |
| KF055309 | L3d1a1a1    | USA                      |
| KF055310 | L2c         | USA                      |
| KF055311 | L2c2a       | USA                      |
| KF055313 | L1b1a       | USA                      |
| KF055314 | L1b1        | USA                      |
| KF055315 | L3e1e       | USA                      |
| KF055317 | L1c2b2      | USA                      |
| KF055318 | L2a1a1      | USA                      |
| KF055319 | L2c         | USA                      |
| KF055320 | L3e2b1a1    | USA                      |
| KF055321 | L3e4a       | USA                      |
| KF055322 | L1b1a18     | USA                      |
| KF055323 | L2a1c+16129 | USA                      |
| KF055324 | L3b1a4      | USA                      |
| KF055325 | L2c1        | USA                      |
| KF055326 | L2a1a2      | USA                      |
| KF055327 | L2a1e1      | USA                      |
| KF450918 | L1c2b2      | Pakistan                 |
| KF450919 | L0a2a2a     | Pakistan                 |
| KF450936 | L0d3        | Pakistan                 |
| KF451012 | L1c4b       | Central African Republic |



|          |                |                          |          |            |                          |
|----------|----------------|--------------------------|----------|------------|--------------------------|
| KF451013 | L0a2b          | Congo                    | KF451443 | L2a1a2b    | Nigeria                  |
| KF451014 | L2a2b1a        | Congo                    | KF451444 | L3e1       | Nigeria                  |
| KF451015 | L1c1a1a1a      | Central African Republic | KF451445 | L2a1f      | Nigeria                  |
| KF451016 | L1c1a2a2       | Central African Republic | KF451446 | L3d6       | Nigeria                  |
| KF451017 | L0a2a1         | Central African Republic | KF451447 | L3e2a2     | Nigeria                  |
| KF451018 | L1c1a1a1a      | Central African Republic | KF451448 | L3f1b4b    | Nigeria                  |
| KF451019 | L1c1a1a1a      | Central African Republic | KF451449 | L1b1a18    | Nigeria                  |
| KF451020 | L0a2b          | Congo                    | KF451450 | L2a1a2b    | Nigeria                  |
| KF451021 | L0a2a1         | Central African Republic | KF451451 | L3e1e      | Nigeria                  |
| KF451022 | L1c1a2a1       | Central African Republic | KF451452 | L2a1f2     | Nigeria                  |
| KF451023 | L1c1a1a1b1     | Central African Republic | KF451453 | L2a1c5     | Nigeria                  |
| KF451024 | L1c1a1a1b      | Central African Republic | KF451454 | L1c3a1b    | Nigeria                  |
| KF451025 | L1c4b          | Central African Republic | KF451455 | L1b1a10    | Nigeria                  |
| KF451026 | L5a1c          | Congo                    | KF451456 | L2a1a3c    | Nigeria                  |
| KF451027 | L2a2b1a        | Congo                    | KF451457 | L2a1i1     | Nigeria                  |
| KF451028 | L1c1a1a1a      | Central African Republic | KF451458 | L3e3b1     | Nigeria                  |
| KF451029 | L0a2a1         | Central African Republic | KF451495 | L1c4b      | Central African Republic |
| KF451030 | L1c1a2b        | Central African Republic | KF451496 | L0a2b      | Congo                    |
| KF451031 | L0a2b          | Congo                    | KF451497 | L2a2b2     | Congo                    |
| KF451032 | L2a2b1a        | Congo                    | KF451498 | L0a2b      | Congo                    |
| KF451033 | L1c1a1a1b1     | Central African Republic | KF451499 | L1c1a2b    | Central African Republic |
| KF451034 | L1c4b          | Central African Republic | KF451500 | L1c4b      | Central African Republic |
| KF451035 | L2a4a          | Congo                    | KF451501 | L0d1b2a1   | Namibia                  |
| KF451036 | L1c4b          | Central African Republic | KF451502 | L4b2a2c    | Namibia                  |
| KF451037 | L1c1a2b        | Central African Republic | KF451503 | L0d1c3     | Namibia                  |
| KF451038 | L2a2a1         | Congo                    | KF451504 | L0k1a1a    | Namibia                  |
| KF451039 | L1c4b          | Central African Republic | KF451505 | L2a1b1a    | South Africa             |
| KF451040 | L0a2b1         | Congo                    | KF451506 | L0a2a2a    | South Africa             |
| KF451041 | L1c1a2a2       | Central African Republic | KF451537 | L3d3a1a    | South Africa             |
| KF451042 | L2a4a          | Congo                    | KF451538 | L0d1b2b2c1 | Namibia                  |
| KF451043 | L1c1a1a1a      | Central African Republic | KF451539 | L0d2a1a    | South Africa             |
| KF451096 | L2a1+143+16189 | Israel                   | KF451540 | L3d3a1a    | South Africa             |
| KF451132 | L2a1+143+16189 | Israel                   | KF451541 | L0d1b2a1   | Namibia                  |
| KF451138 | L2b1a2         | Israel                   | KF451542 | L0d1a1a1   | South Africa             |
| KF451441 | L1b1a          | Nigeria                  | KF451543 | L0d1b2b2b1 | South Africa             |
| KF451442 | L2a1f          | Nigeria                  | KF451544 | L3d3a1a    | South Africa             |
|          |                |                          | KF672796 | L0a        | Cameroon                 |
|          |                |                          | KF672797 | L0k2a1     | Mozambique               |
|          |                |                          | KF672798 | L0k2a      | Mozambique               |
|          |                |                          | KF672799 | L0d1a1a    | Mozambique               |
|          |                |                          | KF672800 | L0b        | Kenya                    |
|          |                |                          | KF672801 | L0d2c1     | Mozambique               |
|          |                |                          | KF672802 | L0d2b2     | Mozambique               |
|          |                |                          | KF672803 | L0d1c      | Mozambique               |
|          |                |                          | KF672804 | L0d1c      | Mozambique               |

|          |            |                     |
|----------|------------|---------------------|
| KF672805 | L0a1b1a1   | Mozambique          |
| KF672806 | L0a1b1a1a  | Mozambique          |
| KF672807 | L0a1b1a    | Chad                |
| KF672808 | L0a1e      | Mozambique          |
| KF672809 | L0f2a1     | Somalia             |
| KF672810 | L0a2       | Somalia             |
| KF672811 | L0a1       | Chad                |
| KF672812 | L0a1d      | Ethiopia            |
| KF672813 | L0a2c      | Somalia             |
| KF672814 | L0f2b      | Sudan               |
| KF672815 | L0a1d      | Kenya               |
| KF672816 | L0d1b2b2a  | Mozambique          |
| KF672817 | L0f        | Somalia             |
| KF672818 | L0d2c1     | Mozambique          |
| KF672819 | L0a2a2a    | Mozambique          |
| KF672820 | L0a1d      | Somalia             |
| KF672821 | L0a1a+200  | Ethiopia            |
| KF672822 | L0a1a2     | São Tomé e Príncipe |
| KF672823 | L0d3       | Somalia             |
| KF672824 | L0a2a2a    | São Tomé e Príncipe |
| KF672825 | L0a2a2a    | Somalia             |
| KF672826 | L0a1a2     | São Tomé e Príncipe |
| KF672827 | L0a1b1a    | Cameroon            |
| KF672828 | L0f2b      | Sudan               |
| KF672829 | L0a1a      | Chad                |
| KF672830 | L0a1a+200  | Ethiopia            |
| KF672831 | L0a2a1a    | Niger               |
| KF672832 | L0a2a2a    | Mozambique          |
| KF672833 | L0f2a      | Cameroon            |
| KJ185427 | L2a5       | Zambia              |
| KJ185428 | L2a1d2     | Zambia              |
| KJ185429 | L2a1f      | Zambia              |
| KJ185430 | L0a1a2     | Zambia              |
| KJ185431 | L0a1b1a1   | Zambia              |
| KJ185432 | L0a1+16293 | Zambia              |
| KJ185433 | L0a2a1a    | Zambia              |
| KJ185434 | L1b1a      | Zambia              |
| KJ185435 | L1c2b1b1   | Zambia              |
| KJ185436 | L1c2b2     | Zambia              |
| KJ185437 | L1c1a2     | Zambia              |
| KJ185438 | L1c2b1b1   | Zambia              |
| KJ185439 | L1c2b1b1   | Zambia              |
| KJ185440 | L2a1a2     | Zambia              |
| KJ185441 | L2a5       | Zambia              |
| KJ185442 | L2a1b1a    | Zambia              |
| KJ185443 | L2b1a3     | Zambia              |
| KJ185444 | L2b1b      | Zambia              |
| KJ185445 | L3e2b      | Zambia              |
| KJ185446 | L3e1       | Zambia              |
| KJ185447 | L3e4a      | Zambia              |
| KJ185448 | L3e1a1a    | Zambia              |
| KJ185449 | L3e1a3a    | Zambia              |
| KJ185450 | L1c2a1a    | Zambia              |
| KJ185451 | L1c3a      | Zambia              |
| KJ185452 | L2a1b1a    | Zambia              |
| KJ185453 | L1c3a1b    | Zambia              |
| KJ185454 | L1c2a1a    | Zambia              |
| KJ185455 | L2a1a2a1a  | Zambia              |
| KJ185456 | L3e3b1     | Zambia              |
| KJ185457 | L0f1       | Zambia              |
| KJ185458 | L0a2a2a2   | Zambia              |
| KJ185459 | L2a1d2     | Zambia              |
| KJ185460 | L2b1a3     | Zambia              |
| KJ185461 | L0a2a1b    | Zambia              |
| KJ185462 | L0a2a1b    | Zambia              |
| KJ185463 | L0a2d      | Zambia              |
| KJ185464 | L1c2b2     | Zambia              |
| KJ185503 | L0a2a1b    | Angola              |
| KJ185504 | L0a1b1a    | Angola              |
| KJ185505 | L0a2a1b    | Angola              |
| KJ185506 | L0a2a1b    | Angola              |
| KJ185507 | L0a1b2     | Angola              |
| KJ185508 | L0a2a1b    | Angola              |
| KJ185509 | L0a1b1a    | Angola              |
| KJ185510 | L0a1b1     | Angola              |
| KJ185511 | L1b1a+189  | Angola              |
| KJ185512 | L1c2a1b    | Angola              |
| KJ185513 | L1c1b      | Angola              |
| KJ185514 | L1c1b      | Angola              |
| KJ185515 | L1c1b      | Angola              |
| KJ185516 | L1c2a1a    | Angola              |
| KJ185517 | L1c1b      | Angola              |
| KJ185518 | L1c1b      | Angola              |
| KJ185519 | L1c2b1b    | Angola              |
| KJ185520 | L1c1b      | Angola              |
| KJ185521 | L1c3b1a    | Angola              |
| KJ185522 | L1c3b1a    | Angola              |
| KJ185523 | L1c3b1a    | Angola              |
| KJ185524 | L1c2b1b    | Angola              |
| KJ185525 | L2a5       | Angola              |
| KJ185526 | L2c2b1b    | Angola              |

|          |           |        |          |           |        |
|----------|-----------|--------|----------|-----------|--------|
| KJ185527 | L3e2b+152 | Angola | KJ185611 | L3d3a1    | Zambia |
| KJ185528 | L3e4a     | Angola | KJ185612 | L3d3a1b   | Zambia |
| KJ185529 | L3e4a     | Angola | KJ185613 | L3d3a1    | Zambia |
| KJ185530 | L3e1e1    | Angola | KJ185614 | L3d4      | Zambia |
| KJ185531 | L3e1d1    | Angola | KJ185615 | L3d3a1    | Zambia |
| KJ185532 | L3f1b4a   | Angola | KJ185616 | L3e2b1a2  | Zambia |
| KJ185533 | L3f1b4a   | Angola | KJ185655 | L0a2a2a1  | Zambia |
| KJ185534 | L3f1b4a   | Angola | KJ185656 | L0a1a2    | Zambia |
| KJ185535 | L3h1b2    | Angola | KJ185657 | L0a2a2a   | Zambia |
| KJ185536 | L3d3a1b   | Zambia | KJ185658 | L0a2a2a   | Zambia |
| KJ185537 | L3e1a2    | Zambia | KJ185659 | L0a1b1a1  | Zambia |
| KJ185538 | L3e1a3a   | Zambia | KJ185660 | L0a1b1a1  | Zambia |
| KJ185539 | L2c2a1    | Zambia | KJ185661 | L1b1a     | Zambia |
| KJ185540 | L0a1b1a1  | Zambia | KJ185662 | L1c2b1a'b | Zambia |
| KJ185579 | L1c2b1b1  | Zambia | KJ185663 | L1c2b1b1  | Zambia |
| KJ185580 | L1c2b2    | Zambia | KJ185664 | L1c1b     | Zambia |
| KJ185581 | L1c2a1a   | Zambia | KJ185665 | L1c2b1b1  | Zambia |
| KJ185582 | L2a1f3    | Zambia | KJ185666 | L1c3a1b   | Zambia |
| KJ185583 | L2a1f3    | Zambia | KJ185667 | L1c2b2    | Zambia |
| KJ185584 | L2a1c5    | Zambia | KJ185668 | L1c2b1b1  | Zambia |
| KJ185585 | L2a1c5    | Zambia | KJ185669 | L1c2b1b1  | Zambia |
| KJ185586 | L2a1d2    | Zambia | KJ185670 | L1c2b1b1  | Zambia |
| KJ185587 | L2a1b1a   | Zambia | KJ185671 | L1c2b1b1  | Zambia |
| KJ185588 | L2a1b1a   | Zambia | KJ185672 | L1c2a1a   | Zambia |
| KJ185589 | L2a1a1    | Zambia | KJ185673 | L1c2b1b1  | Zambia |
| KJ185590 | L2a1d2    | Zambia | KJ185674 | L1c1a2    | Zambia |
| KJ185591 | L2a1d2    | Zambia | KJ185675 | L1c1      | Zambia |
| KJ185592 | L2a5      | Zambia | KJ185676 | L1c2b1b1  | Zambia |
| KJ185593 | L2a5      | Zambia | KJ185677 | L1c2b2    | Zambia |
| KJ185594 | L2a5      | Zambia | KJ185678 | L2a1f     | Zambia |
| KJ185595 | L2a1c1    | Zambia | KJ185679 | L2a1a2a1a | Zambia |
| KJ185596 | L2a1f3    | Zambia | KJ185680 | L2a1f     | Zambia |
| KJ185597 | L2a1i1    | Zambia | KJ185681 | L2a1f     | Zambia |
| KJ185598 | L2a1i1    | Zambia | KJ185682 | L2a5      | Zambia |
| KJ185599 | L2b1a3    | Zambia | KJ185683 | L2a1f     | Zambia |
| KJ185600 | L2b1a3    | Zambia | KJ185684 | L2a5      | Zambia |
| KJ185601 | L2c2a1    | Zambia | KJ185685 | L2a1f1    | Zambia |
| KJ185602 | L2c2b1b   | Zambia | KJ185686 | L2a1d2    | Zambia |
| KJ185603 | L2c2a1    | Zambia | KJ185687 | L2a5      | Zambia |
| KJ185604 | L2c2a1    | Zambia | KJ185688 | L2a1a     | Zambia |
| KJ185605 | L2c2a1    | Zambia | KJ185689 | L2a1d2    | Zambia |
| KJ185606 | L2e1a     | Zambia | KJ185690 | L2a1i1    | Zambia |
| KJ185607 | L2e1a     | Zambia | KJ185691 | L2a1d2    | Zambia |
| KJ185608 | L2e1a     | Zambia | KJ185692 | L2a1a     | Zambia |
| KJ185609 | L3b1a11   | Zambia | KJ185731 | L2a1c1    | Zambia |
| KJ185610 | L3b1a11   | Zambia | KJ185732 | L2a1a2a1a | Zambia |

|          |           |        |          |           |        |
|----------|-----------|--------|----------|-----------|--------|
| KJ185733 | L2a1a2a1a | Zambia | KJ185817 | L1c2b1a   | Angola |
| KJ185734 | L2a5      | Zambia | KJ185818 | L1c2b2    | Angola |
| KJ185735 | L2a1b1a   | Zambia | KJ185819 | L1c2a3    | Angola |
| KJ185736 | L3b1a1a   | Zambia | KJ185820 | L1c3b1a   | Angola |
| KJ185737 | L3b1a1    | Zambia | KJ185821 | L1c3c     | Angola |
| KJ185738 | L3b1a11   | Zambia | KJ185822 | L1c1b     | Angola |
| KJ185739 | L3e1a3a   | Zambia | KJ185823 | L2a5      | Angola |
| KJ185740 | L3e1d1    | Zambia | KJ185824 | L2a1a2a1a | Angola |
| KJ185741 | L3e4a     | Zambia | KJ185825 | L2a1b1a   | Angola |
| KJ185742 | L3e1a3a   | Zambia | KJ185826 | L2a1a2a1a | Angola |
| KJ185743 | L3e1a3a   | Zambia | KJ185827 | L2a1a1    | Angola |
| KJ185744 | L3e4a     | Zambia | KJ185828 | L2a1b     | Angola |
| KJ185745 | L3e4a     | Zambia | KJ185829 | L2a1a2    | Angola |
| KJ185746 | L3e4a     | Zambia | KJ185830 | L2a5      | Angola |
| KJ185747 | L3e1f1a   | Zambia | KJ185831 | L2b2a     | Angola |
| KJ185748 | L5a2      | Zambia | KJ185832 | L2b1a3    | Angola |
| KJ185749 | L0a2a2a   | Angola | KJ185833 | L2b2a     | Angola |
| KJ185750 | L0a1b2    | Angola | KJ185834 | L2c2b1b   | Angola |
| KJ185751 | L0a2a1a   | Angola | KJ185835 | L3d3a1a   | Angola |
| KJ185752 | L0a2a1a   | Angola | KJ185836 | L3d1a2    | Angola |
| KJ185753 | L0a1b1a   | Angola | KJ185837 | L3d1b3a   | Angola |
| KJ185754 | L0a1a2    | Angola | KJ185838 | L3d1a1a   | Angola |
| KJ185755 | L0a2a1b   | Angola | KJ185839 | L3e1      | Angola |
| KJ185756 | L0a1b1a   | Angola | KJ185840 | L3e1e1    | Angola |
| KJ185757 | L0a1b1a   | Angola | KJ185841 | L3e1a3    | Angola |
| KJ185758 | L0a1b2    | Angola | KJ185842 | L3e1      | Angola |
| KJ185759 | L0a1b1a   | Angola | KJ185843 | L3e2b3    | Angola |
| KJ185760 | L1b1a15   | Angola | KJ185844 | L3e2b3    | Angola |
| KJ185761 | L1c2b1b   | Angola | KJ185883 | L0a2a1a   | Zambia |
| KJ185762 | L1c1b     | Angola | KJ185884 | L0a1a2    | Zambia |
| KJ185763 | L1c2b1b1  | Angola | KJ185885 | L1b1a3    | Zambia |
| KJ185764 | L1c2a3    | Angola | KJ185886 | L1b1a10b  | Zambia |
| KJ185765 | L1c2a2    | Angola | KJ185887 | L1c3b1a   | Zambia |
| KJ185766 | L1c3b1a   | Angola | KJ185888 | L1c2b1b1  | Zambia |
| KJ185767 | L1c1a2    | Angola | KJ185889 | L1c2b1b1  | Zambia |
| KJ185768 | L2a1a     | Angola | KJ185890 | L1c2a1a   | Zambia |
| KJ185807 | L1b1a10   | Angola | KJ185891 | L1c2b1b1  | Zambia |
| KJ185808 | L1b1a     | Angola | KJ185892 | L1c2b1b1  | Zambia |
| KJ185809 | L1b1a10   | Angola | KJ185893 | L2a1f     | Zambia |
| KJ185810 | L1b1a10   | Angola | KJ185894 | L2a1g     | Zambia |
| KJ185811 | L1b1a     | Angola | KJ185895 | L2a1f3    | Zambia |
| KJ185812 | L1b1a10   | Angola | KJ185896 | L2a1a2    | Zambia |
| KJ185813 | L1c4b     | Angola | KJ185897 | L2a1f     | Zambia |
| KJ185814 | L1c2b1a'b | Angola | KJ185898 | L2a1d2    | Zambia |
| KJ185815 | L1c3a1a   | Angola | KJ185899 | L2a1f     | Zambia |
| KJ185816 | L1c2b1a   | Angola | KJ185900 | L2a1i1    | Zambia |

|          |           |        |
|----------|-----------|--------|
| KJ185901 | L2a1d2    | Zambia |
| KJ185902 | L2e1a     | Zambia |
| KJ185903 | L3d3a1    | Zambia |
| KJ185904 | L3e1a3a   | Zambia |
| KJ185905 | L3e1e1    | Zambia |
| KJ185906 | L3e1d1a   | Zambia |
| KJ185907 | L3e1a3a   | Zambia |
| KJ185908 | L3e1a3a   | Zambia |
| KJ185909 | L3e1a3a   | Zambia |
| KJ185910 | L3e2b     | Zambia |
| KJ185911 | L3e3a     | Zambia |
| KJ185912 | L3e1a3a   | Zambia |
| KJ185913 | L3e1a3a   | Zambia |
| KJ185914 | L3e1a3a   | Zambia |
| KJ185915 | L3f2a1    | Zambia |
| KJ185916 | L1c2b1b1  | Zambia |
| KJ185917 | L1c2b1b1  | Zambia |
| KJ185918 | L1c3b1a   | Zambia |
| KJ185919 | L1c2b2    | Zambia |
| KJ185920 | L1c2b1b1  | Zambia |
| KJ185959 | L3e1e1    | Zambia |
| KJ185960 | L3e1e1    | Zambia |
| KJ185961 | L3e1e1    | Zambia |
| KJ185962 | L3e1a3a   | Zambia |
| KJ185963 | L1c2b1b1  | Zambia |
| KJ185964 | L1c3a     | Zambia |
| KJ185965 | L3d3a1    | Zambia |
| KJ185966 | L0a1b1a1  | Zambia |
| KJ185967 | L0a1b1a1  | Zambia |
| KJ185968 | L0a2a1a2  | Zambia |
| KJ185969 | L1c2a1a   | Zambia |
| KJ185970 | L0a2a2a   | Zambia |
| KJ185971 | L3e1f1a   | Zambia |
| KJ185972 | L0a1a2    | Zambia |
| KJ185973 | L2a1a2a1a | Zambia |
| KJ185974 | L2b2      | Zambia |
| KJ185975 | L3d1a1a   | Zambia |
| KJ185976 | L3e1e1    | Zambia |
| KJ185977 | L0a1b1a1  | Zambia |
| KJ185978 | L0a1b1a1  | Zambia |
| KJ185979 | L0a1b1a1  | Zambia |
| KJ185980 | L1c2b1b1  | Zambia |
| KJ185981 | L1c3b1a   | Zambia |
| KJ185982 | L2a1a1    | Zambia |
| KJ185983 | L2c2a1    | Zambia |
| KJ185984 | L3e1a3a   | Zambia |

|          |            |                          |
|----------|------------|--------------------------|
| KJ185985 | L2a1f      | Zambia                   |
| KJ185986 | L2a2b      | Zambia                   |
| KJ185987 | L2a1f1     | Zambia                   |
| KJ185988 | L3e2b      | Zambia                   |
| KJ185989 | L3f1b4a    | Zambia                   |
| KJ185990 | L0a1b1a1   | Zambia                   |
| KJ185991 | L3d3a1     | Zambia                   |
| KJ185992 | L3d3a1a    | Zambia                   |
| KJ185993 | L3d1a1a    | Zambia                   |
| KJ185994 | L2c2a1     | Zambia                   |
| KJ185995 | L0g        | Zambia                   |
| KJ185996 | L1c2a1a    | Zambia                   |
| KJ445763 | L0a2a2a    | South Africa             |
| KJ445764 | L5a1c      | Congo                    |
| KJ445765 | L5a1       | Kenya                    |
| KJ445766 | L1c3a1b    | Nigeria                  |
| KJ445767 | L1c1a2b    | Central African Republic |
| KJ445768 | L1c1a2b    | Central African Republic |
| KJ445769 | L1c1a2b    | Central African Republic |
| KJ445770 | L1c1a2b    | Central African Republic |
| KJ445771 | L1c1a2b    | Central African Republic |
| KJ445772 | L1c1a2b    | Central African Republic |
| KJ445773 | L1c1a2b    | Central African Republic |
| KJ445774 | L1c1a2a1   | Central African Republic |
| KJ445775 | L1c1a2a2   | Central African Republic |
| KJ445776 | L1c1a2a2   | Central African Republic |
| KJ445777 | L1c1a2a2   | Central African Republic |
| KJ445778 | L1c1a1a1a  | Central African Republic |
| KJ445779 | L1c1a1a1a  | Central African Republic |
| KJ445780 | L1c1a1a1a  | Central African Republic |
| KJ445781 | L1c1a1a1a  | Central African Republic |
| KJ445782 | L1c1a1a1a  | Central African Republic |
| KJ445783 | L1c1a1a1a  | Central African Republic |
| KJ445784 | L1c1a1a1a  | Central African Republic |
| KJ445785 | L1c1a1a1a  | Central African Republic |
| KJ445786 | L1c1a1a1b1 | Central African Republic |

|          |            |                          |          |            |              |
|----------|------------|--------------------------|----------|------------|--------------|
| KJ445787 | L1c1a1a1b1 | Central African Republic | KJ446757 | L2a1c3b1   | Senegal      |
| KJ445788 | L1c1a1a1   | Central African Republic | KJ446758 | L2a1c3b1   | Senegal      |
| KJ445789 | L1c4b      | Central African Republic | KJ446759 | L2a1c2     | Senegal      |
| KJ445790 | L1c4       | Central African Republic | KJ446760 | L2a1f2     | Nigeria      |
| KJ445791 | L1c4b      | Central African Republic | KJ446761 | L2a1a3c    | Nigeria      |
| KJ445792 | L1c4b      | Central African Republic | KJ446762 | L2a1a2     | Pakistan     |
| KJ445793 | L1c4b      | Central African Republic | KJ446763 | L2a1a2b    | Nigeria      |
| KJ445794 | L1c4b      | Central African Republic | KJ446764 | L2a1i1     | Nigeria      |
| KJ445795 | L1c4b      | Central African Republic | KJ446765 | L2a1g      | Pakistan     |
| KJ445796 | L1c4b      | Central African Republic | KJ446766 | L2a1c5     | Nigeria      |
| KJ445797 | L1c4b      | Central African Republic | KJ446767 | L2a1c5     | Nigeria      |
| KJ445798 | L1c2a1a    | Kenya                    | KJ669130 | L0d1c1a1b  | Namibia      |
| KJ445799 | L1c2a1a    | Kenya                    | KJ669131 | L0d1c1a1a  | Namibia      |
| KJ445800 | L1c2b2     | Pakistan                 | KJ669132 | L0d1c1a1a  | Namibia      |
| KJ446543 | L3e3b1     | Nigeria                  | KJ669133 | L0d1c1a1b  | Namibia      |
| KJ446544 | L3e1       | Nigeria                  | KJ669134 | L0d1c1a2   | Namibia      |
| KJ446545 | L3e1e      | Nigeria                  | KJ669135 | L0d1b1b    | South Africa |
| KJ446546 | L3e1b1     | Israel                   | KJ669136 | L0d1c      | Namibia      |
| KJ446547 | L3e1b1     | Israel                   | KJ669137 | L0d1d      | South Africa |
| KJ446548 | L3e2b1     | Algeria                  | KJ669138 | L0d1a1d    | South Africa |
| KJ446549 | L3e2b+152  | Kenya                    | KJ669139 | L0d1a1c    | Namibia      |
| KJ446550 | L3e2a1b1   | Algeria                  | KJ669140 | L0d1a1a1   | Namibia      |
| KJ446551 | L3e2a2     | Nigeria                  | KJ669141 | L0d1a1b1b  | South Africa |
| KJ446552 | L3e2a      | Algeria                  | KJ669142 | L0d1a1a    | Namibia      |
| KJ446740 | L2b1a2     | Israel                   | KJ669143 | L0d1a1a2   | Namibia      |
| KJ446741 | L2b1a2     | Israel                   | KJ669144 | L0d1b2b2b1 | South Africa |
| KJ446742 | L2c1a      | Senegal                  | KJ669145 | L0d1b2b2a  | South Africa |
| KJ446743 | L2c1a      | Senegal                  | KJ669146 | L0d1b2b2a  | Namibia      |
| KJ446744 | L2c5       | Senegal                  | KJ669147 | L0d1b2b2c2 | Namibia      |
| KJ446745 | L2c3a      | Senegal                  | KJ669148 | L0d1b2b2c2 | Namibia      |
| KJ446746 | L2c3a      | Senegal                  | KJ669149 | L0d1b2a1   | Namibia      |
| KJ446747 | L2c3a      | Senegal                  | KJ669150 | L0d1b2b1b1 | South Africa |
| KJ446748 | L2a2a1     | Congo                    | KJ669151 | L0d1b2b2c2 | Namibia      |
| KJ446749 | L2a2b2     | Congo                    | KJ669152 | L0d1b2a1   | Namibia      |
| KJ446750 | L2a2b1a    | Congo                    | KJ669153 | L0d1b2b1b1 | Namibia      |
| KJ446751 | L2a2b1a    | Congo                    | KJ669154 | L0d1b2b2b1 | Namibia      |
| KJ446752 | L2a2b1a    | Congo                    | KJ669155 | L0d1b2b1b1 | Namibia      |
| KJ446753 | L2a4a      | Congo                    | KJ669156 | L0d2c1     | South Africa |
| KJ446754 | L2a4a      | Congo                    | KJ669157 | L0d2c1     | South Africa |
| KJ446755 | L2a1c1     | Senegal                  | KJ669158 | L0d2c1     | South Africa |
| KJ446756 | L2a1c3b1   | Senegal                  | KJ669159 | L0d2c1a    | Namibia      |
|          |            |                          | KJ669160 | L0d2c1     | Namibia      |
|          |            |                          | KJ669161 | L0d2c2     | Namibia      |
|          |            |                          | KJ669162 | L0d2c2b    | South Africa |
|          |            |                          | KJ669163 | L0d2c1a1   | Namibia      |
|          |            |                          | KJ669164 | L0d2c2a1   | Namibia      |

|          |                 |              |
|----------|-----------------|--------------|
| KJ669165 | L0d2c2          | Namibia      |
| KJ669166 | L0d2b1b         | South Africa |
| KJ669167 | L0d2d           | Namibia      |
| KM101583 | L3f1b1a         | USA          |
| KM101585 | L3f1b1a         | USA          |
| KM101586 | L3b2b           | USA          |
| KM101587 | L3f1b1a         | USA          |
| KM101588 | L1c3a           | USA          |
| KM101589 | L3f1b+16292+150 | USA          |
| KM101590 | L2a1b1          | USA          |
| KM101591 | L3e2b+152       | USA          |
| KM101592 | L2c             | USA          |
| KM101593 | L2c             | USA          |
| KM101594 | L2a1m1a         | USA          |
| KM101595 | L1b1a           | USA          |
| KM101596 | L3e2a1b1        | USA          |
| KM101597 | L3b3            | USA          |
| KM101598 | L0a1a2          | USA          |
| KM101599 | L2c2            | USA          |
| KM101600 | L3b2            | USA          |
| KM101601 | L2a1f           | USA          |
| KM101602 | L3e2b           | USA          |
| KM101603 | L2a1f           | USA          |
| KM101604 | L2a1c3a1        | USA          |
| KM101606 | L3e2b           | USA          |
| KM101608 | L3e3b           | USA          |
| KM101609 | L2a1f           | USA          |
| KM101610 | L2a1b1          | USA          |
| KM101611 | L2a1f2          | USA          |
| KM101612 | L3e2a1b1        | USA          |
| KM101613 | L3e2a1b3        | USA          |
| KM101614 | L3f1b+16292+150 | USA          |
| KM101615 | L2b2            | USA          |
| KM101616 | L1b1a7a         | USA          |
| KM101617 | L3e4a           | USA          |
| KM101618 | L2a1c5          | USA          |
| KM101619 | L2c2            | USA          |
| KM101620 | L1b1a6          | USA          |
| KM101621 | L1b1a7          | USA          |
| KM101622 | L3e2a1b1        | USA          |
| KM101625 | L1b1a3a         | USA          |
| KM101666 | L1b1a10         | USA          |
| KM101667 | L2c4            | USA          |
| KM101668 | L1c1b           | USA          |
| KM101669 | L3h1b1a         | USA          |
| KM101670 | L1b1a17         | USA          |
| KM101671 | L3b1a           | USA          |
| KM101672 | L3f1b1a         | USA          |
| KM101673 | L2a1c           | USA          |
| KM101674 | L2a1a1          | USA          |
| KM101675 | L3f1b+16292+150 | USA          |
| KM101677 | L3e3b           | USA          |
| KM101678 | L0a1a2          | USA          |
| KM101679 | L3f1b1a1        | USA          |
| KM101680 | L1c3a           | USA          |
| KM101681 | L3b3            | USA          |
| KM101682 | L3b1b           | USA          |
| KM101683 | L2a1f1          | USA          |
| KM101684 | L2a1+143+@16309 | USA          |
| KM101685 | L2a1l2          | USA          |
| KM101686 | L3d1a2          | USA          |
| KM101687 | L1b1a7          | USA          |
| KM101688 | L3b1a1a         | USA          |
| KM101689 | L2a1a1          | USA          |
| KM101692 | L3f1b4a1        | USA          |
| KM101693 | L2a1b1          | USA          |
| KM101694 | L1c3b1b         | USA          |
| KM101695 | L1b1a7          | USA          |
| KM101696 | L2a1f           | USA          |
| KM101697 | L1c3a1a         | USA          |
| KM101698 | L3e2a1b         | USA          |
| KM101699 | L1b1a14         | USA          |
| KM101700 | L3f1b1a         | USA          |
| KM101701 | L3f1b4c         | USA          |
| KM101702 | L3f1b1a         | USA          |
| KM101703 | L2a1e           | USA          |
| KM101704 | L2a1c3b         | USA          |
| KM101705 | L2c2a           | USA          |
| KM101706 | L2a1a2          | USA          |
| KM102097 | L1b1a7a         | USA          |
| KM102101 | L3b1a10         | USA          |
| KM102103 | L3e1e2          | USA          |
| KM102104 | L2c             | USA          |
| KM102105 | L3b1a+152       | USA          |
| KM102112 | L3e1e2          | USA          |
| KM102120 | L3d1'2'3'4'5'6  | USA          |
| KM102147 | L3f1b4          | USA          |
| KM245150 | L2a1+143+@16309 | Saudi Arabia |
| KM245151 | L3i1a           | Saudi Arabia |
| KM245152 | L3i1a           | Ethiopia     |
| KM986515 | L2d1a           | Yemen        |
| KM986519 | L0a2c           | Yemen        |



|          |                |                      |
|----------|----------------|----------------------|
| KM986521 | L2a1a2         | Yemen                |
| KM986523 | L4b2a2c        | Yemen                |
| KM986524 | L5a1b          | Yemen                |
| KM986525 | L5a1a          | Yemen                |
| KM986528 | L0f            | Yemen                |
| KM986532 | L0a1a+200      | Yemen                |
| KM986536 | L2a1a2a1a      | Yemen                |
| KM986538 | L3x1+16311     | Yemen                |
| KM986543 | L3x1+16311     | Yemen                |
| KM986544 | L3f            | Yemen                |
| KM986546 | L3d3a1a        | Yemen                |
| KM986547 | L3h1b1a        | Yemen                |
| KM986549 | L3x2a          | Yemen                |
| KM986551 | L3h1b1a        | Yemen                |
| KM986553 | L3k1           | Yemen                |
| KM986555 | L0a2c          | Yemen                |
| KM986556 | L3x1+16311     | Yemen                |
| KM986559 | L3x2a          | Yemen                |
| KM986561 | L3e2b          | Yemen                |
| KM986563 | L0a2a2a        | Yemen                |
| KM986564 | L3h1a2b        | Yemen                |
| KM986566 | L3x1           | Yemen                |
| KM986567 | L3b1a1a        | Yemen                |
| KM986571 | L0a2c          | Yemen                |
| KM986575 | L3b1a1a        | Yemen                |
| KP229451 | L3i1           | Unknown              |
| KP229452 | L3i1           | Unknown              |
| KP229453 | L3i1           | Unknown              |
| KP229454 | L3i1           | Unknown              |
| KP229455 | L3i1           | Unknown              |
| KP240909 | L2a2b1a        | Congo                |
| KP240910 | L2a1a2b        | Nigeria              |
| KP240911 | L2a1b1a        | South Africa         |
| KP240912 | L2a1+143+16189 | Israel               |
| KP240913 | L2a1c+16129    | Israel               |
| KP240914 | L3d1a1a        | Pakistan             |
| KP240915 | L3d1b          | Senegal              |
| KP240928 | L0d1a1a1       | South Africa         |
| KP240929 | L0a2b          | Congo                |
| KP240930 | L0a2b          | Congo                |
| KP317053 | L4b2b          | Niger                |
| KP317054 | L4a1a          | United Arab Emirates |
| KP317055 | L4b2a2         | United Arab Emirates |
| KP317056 | L4b2a2c        | Ethiopia             |
| KP317057 | L6a            | Ethiopia             |
| KP317058 | L4a1a          | Ethiopia             |
| KP317059 | L4a1a          | Ethiopia             |
| KP317060 | L6b            | Ethiopia             |
| KP317061 | L4a1a          | Ethiopia             |
| KP317062 | L4b1a          | Burkina Faso         |
| KP317063 | L4b2b          | Chad                 |
| KP317064 | L4b2b          | Chad                 |
| KP317065 | L4b2b1         | Niger                |
| KP317066 | L4b2a2a        | Ethiopia             |
| KP317067 | L6b            | Kenya                |
| KP317068 | L4b2a2b        | Kenya                |
| KP317069 | L4b2a2a        | Sudan                |
| KP317070 | L4b2a2         | Sudan                |
| KP317071 | L6a            | Somalia              |
| KP317072 | L4b2a2c        | Somalia              |
| KP317073 | L4a2           | Somalia              |
| KP317074 | L4b2a1         | Somalia              |
| KP317075 | L4b2a          | Somalia              |
| KR135863 | L2c2           | São Tomé e Príncipe  |
| KR135864 | L2c            | São Tomé e Príncipe  |
| KR135865 | L2b2a          | São Tomé e Príncipe  |
| KR135866 | L2a1a3c        | São Tomé e Príncipe  |
| KR135867 | L2a1+143       | Ethiopia             |
| KR135868 | L2a1+143+16189 | Ethiopia             |
| KR135869 | L2a1+143       | Ethiopia             |
| KR135870 | L2a1c+16129    | Ethiopia             |
| KR135871 | L2a1a          | Mozambique           |
| KR135872 | L2a1a2         | Mozambique           |
| KR135873 | L2a1b1a        | Mozambique           |
| KR135874 | L2a1b1a        | Mozambique           |
| KR135875 | L2a1b1a        | Mozambique           |
| KR135876 | L2a1a2         | Mozambique           |
| KR135877 | L2a1b1a        | Mozambique           |
| KR135878 | L2a1a2         | Mozambique           |
| KR135879 | L2a1a2         | Mozambique           |
| KR135880 | L2a1h          | Mozambique           |
| KR135881 | L2a1a2a1a      | Mozambique           |
| KR135882 | L2a1b1a        | Mozambique           |
| KR135883 | L2a1a          | Mozambique           |
| KR135884 | L2a1d2         | Mozambique           |
| KT756878 | L2d+16129      | Mexico               |
| KT819205 | L1b1a12a       | Spain                |
| KT819206 | L1b1a6         | Spain                |
| KT819207 | L2a1+143+16189 | Spain                |

|          |           |            |
|----------|-----------|------------|
| KT819208 | L2a1c6    | Spain      |
| KT819209 | L2b1a     | Spain      |
| KT819210 | L2b3a     | Spain      |
| KT819211 | L3f1b1    | Spain      |
| KT819224 | L2a1b+143 | Spain      |
| KT819225 | L3d1b1    | Spain      |
| KT819226 | L3d3b     | Spain      |
| KT819227 | L3h1b1a   | Spain      |
| KT819228 | L3x2b     | Spain      |
| KT819237 | L1b1a6    | Morocco    |
| KT819238 | L2a1+143  | Morocco    |
| KT819239 | L2b1a     | Morocco    |
| MF055747 | L3e3b1    | Madagascar |
| MF055748 | L3b1a1a   | Madagascar |
| MF055749 | L1c2a2    | Madagascar |
| MF055750 | L3e3b1    | Madagascar |
| MF055752 | L2a1b1a   | Madagascar |
| MF055753 | L3e3b1    | Madagascar |
| MF055754 | L3b1a1a   | Madagascar |
| MF055756 | L0d1c     | Madagascar |
| MF055757 | L3b1a1a   | Madagascar |
| MF055758 | L3d1a1a1  | Madagascar |
| MF055759 | L3d1a1a   | Madagascar |
| MF055760 | L2a1b1a   | Madagascar |
| MF055761 | L0a2      | Madagascar |
| MF055762 | L3b1a1a   | Madagascar |
| MF055765 | L3e3a     | Madagascar |
| MF055775 | L0a1b1a1  | Madagascar |
| MF055780 | L3b1a8    | Madagascar |
| MF055781 | L3e3b1    | Madagascar |
| MF055783 | L1c3c     | Madagascar |
| MF055785 | L2a1a2    | Madagascar |
| MF055786 | L0a1b1a1  | Madagascar |
| MF055787 | L0a2a2a   | Madagascar |
| MF055789 | L2a1a2    | Madagascar |
| MF055790 | L3b1a3    | Madagascar |
| MF055791 | L3e3b1    | Madagascar |
| MF055795 | L3a+709   | Madagascar |
| MF055803 | L3e3a     | Madagascar |
| MF055804 | L3d1a1a   | Madagascar |
| MF055805 | L3d1a1a   | Madagascar |
| MF055807 | L3d1a1a   | Madagascar |
| MF055809 | L3d1a1a1  | Madagascar |
| MF055810 | L3e1a1a   | Madagascar |
| MF055811 | L0a2a1a   | Madagascar |
| MF055812 | L3e3b1    | Madagascar |

|          |          |            |
|----------|----------|------------|
| MF055815 | L0a1b1a1 | Madagascar |
| MF055816 | L2a1b1a  | Madagascar |
| MF055818 | L3b1a1a  | Madagascar |
| MF055821 | L3e1a3a  | Madagascar |
| MF055918 | L3e3a    | Madagascar |
| MF055925 | L0a2a2a  | Madagascar |
| MF055928 | L0a2a2a  | Madagascar |
| MF055929 | L3e3b1   | Madagascar |
| MF055932 | L0a2a2a  | Madagascar |
| MF055933 | L0a2a2a  | Madagascar |
| MF055934 | L1c3c    | Madagascar |
| MF055936 | L2a1b1a  | Madagascar |
| MF055937 | L2a1b1a  | Madagascar |
| MF055939 | L0a2a1b  | Madagascar |
| MF055940 | L2a1b1a  | Madagascar |
| MF055943 | L2a1b1a  | Madagascar |
| MF055944 | L1c1d    | Madagascar |
| MF055945 | L0f      | Madagascar |
| MF055954 | L0a1b1a1 | Madagascar |
| MF055957 | L3b1a8   | Madagascar |
| MF055959 | L3b1a1a  | Madagascar |
| MF055961 | L0a2a2a  | Madagascar |
| MF055962 | L3e1a1a  | Madagascar |
| MF055963 | L3e3a    | Madagascar |
| MF055966 | L0a1b1a1 | Madagascar |
| MF055969 | L3k1     | Madagascar |
| MF055970 | L2a1b1a  | Madagascar |
| MF055971 | L3d1a1a  | Madagascar |
| MF055973 | L0a1b1a  | Madagascar |
| MF055974 | L3d1a1a  | Madagascar |
| MF055978 | L3d1a1a  | Madagascar |
| MF055979 | L3e1a3a  | Madagascar |
| MF055980 | L3e3a    | Madagascar |
| MF055986 | L0a2a2a  | Madagascar |
| MF055988 | L0a2a2a  | Madagascar |
| MF055989 | L3b1a1a  | Madagascar |
| MF055991 | L3d1a1a  | Madagascar |
| MF055993 | L0a1b1a1 | Madagascar |
| MF056005 | L1b2a    | Madagascar |
| MF056008 | L3e1a3a  | Madagascar |
| MF056009 | L3b1a1a  | Madagascar |
| MF056010 | L2a1b1a  | Madagascar |
| MF056132 | L2a1f    | Madagascar |
| MF056134 | L2a1f    | Madagascar |
| MF056142 | L3b1a1a  | Madagascar |
| MF056145 | L2a1b1a  | Madagascar |

|          |           |            |
|----------|-----------|------------|
| MF056150 | L3e2b+152 | Madagascar |
| MF056151 | L1b2a     | Madagascar |
| MF056155 | L3b1a1a   | Madagascar |
| MF056157 | L2a1b1a   | Madagascar |
| MF056158 | L2a1b1a   | Madagascar |
| MF056159 | L2a1b1a   | Madagascar |
| MF056160 | L2a1a2    | Madagascar |
| MF056161 | L3b1a1a   | Madagascar |
| MF056163 | L2a1b1a   | Madagascar |
| MF056167 | L3b1a1a   | Madagascar |
| MF056169 | L2a5      | Madagascar |
| MF056172 | L2a1a     | Madagascar |
| MF056175 | L2a1f3    | Madagascar |
| MF056176 | L2a1a3c   | Madagascar |
| MF056177 | L3d1a1a   | Madagascar |
| MF056187 | L3e1a3a   | Madagascar |
| MF056190 | L0a2a2a   | Madagascar |
| MF056194 | L3b1a1a   | Madagascar |
| MF056195 | L2a1b1a   | Madagascar |
| MF056199 | L3a+709   | Madagascar |
| MF056204 | L3e3b1    | Madagascar |
| MF056210 | L2a5      | Madagascar |
| MF056212 | L3a+709   | Madagascar |
| MF056213 | L2a1b1a   | Madagascar |
| MF056214 | L3b1a1a   | Madagascar |
| MF056219 | L0a2a1b   | Madagascar |
| MF056221 | L2a1a2    | Madagascar |
| MF056223 | L3a+709   | Madagascar |
| MF056224 | L2a1a2    | Madagascar |
| MF056225 | L3b1a1a   | Madagascar |
| MF056235 | L3a+709   | Madagascar |
| MF056238 | L3b1a1a   | Madagascar |
| MF056239 | L3b1a1a   | Madagascar |
| MF056251 | L3b1a1a   | Madagascar |
| MF056342 | L2a1b1a   | Madagascar |
| MF056344 | L2a1a2    | Madagascar |
| MF056345 | L3d1a     | Madagascar |
| MF056348 | L2a1b1a   | Madagascar |
| MF056351 | L3e3b2    | Madagascar |
| MF056354 | L0a2a2a   | Madagascar |
| MF056355 | L3d1a1a1  | Madagascar |
| MF056359 | L0a2a2a   | Madagascar |
| MF056360 | L2a1a     | Madagascar |
| MF056361 | L0f       | Madagascar |
| MF056364 | L1c2b2    | Madagascar |
| MF056365 | L2a1f3    | Madagascar |
| MF056368 | L3b1a1a   | Madagascar |
| MF056371 | L3a1b     | Madagascar |
| MF056373 | L3a1b     | Madagascar |
| MF056376 | L2b1a3    | Madagascar |
| MF056381 | L3d1a1a1  | Madagascar |
| MF056383 | L0a1b1a1  | Madagascar |
| MF056384 | L3d1a1a   | Madagascar |
| MF056386 | L3e1a3a   | Madagascar |
| MF056387 | L0a2a2a   | Madagascar |
| MF056392 | L3b2      | Madagascar |
| MF056393 | L3b1a1a   | Madagascar |
| MF056394 | L3e1a3a   | Madagascar |
| MF056395 | L1c2a1a   | Madagascar |
| MF056397 | L2a1b1a   | Madagascar |
| MF056398 | L3e3a     | Madagascar |
| MF056402 | L3e3b1    | Madagascar |
| MF056403 | L0a2a2a   | Madagascar |
| MF056404 | L3d1a1a   | Madagascar |
| MF056407 | L2a1f     | Madagascar |
| MF056408 | L3d3b     | Madagascar |
| MF056409 | L3d1a1a   | Madagascar |
| MF056410 | L2a1b1a   | Madagascar |
| MF056412 | L2a1a2    | Madagascar |
| MF056415 | L3b1a11   | Madagascar |
| MF056416 | L3e1b2    | Madagascar |
| MF056418 | L3e3a     | Madagascar |
| MF056512 | L3b1a1a   | Madagascar |
| MF056514 | L2a1a2    | Madagascar |
| MF056516 | L3d1a1a   | Madagascar |
| MF056518 | L3b1a1a   | Madagascar |
| MF056526 | L3d1a1a   | Madagascar |
| MF056529 | L3d1a1a   | Madagascar |
| MF056533 | L2a1b1a   | Madagascar |
| MF056534 | L3d1a1a   | Madagascar |
| MF056536 | L3d3b     | Madagascar |
| MF056537 | L0a2a2a   | Madagascar |
| MF056538 | L3e1a1a   | Madagascar |
| MF056539 | L3d1a1a   | Madagascar |
| MF056542 | L3e2b     | Madagascar |
| MF056544 | L2a1b1a   | Madagascar |
| MF056545 | L0a2a2a   | Madagascar |
| MF056548 | L2a1a2    | Madagascar |
| MF056553 | L3b1a11   | Madagascar |
| MF056554 | L2a1a2    | Madagascar |
| MF056555 | L2a1b1a   | Madagascar |
| MF056556 | L2a1a2    | Madagascar |

|          |           |            |
|----------|-----------|------------|
| MF056558 | L2a1a2    | Madagascar |
| MF056559 | L2a1b1a   | Madagascar |
| MF056561 | L2a1b1a   | Madagascar |
| MF056562 | L1c2a1a   | Madagascar |
| MF056563 | L3e3a     | Madagascar |
| MF056564 | L0f       | Madagascar |
| MF056565 | L1c3c     | Madagascar |
| MF056566 | L2a1b1a   | Madagascar |
| MF056567 | L1c2a1a   | Madagascar |
| MF056568 | L2a1b1a   | Madagascar |
| MF056571 | L2a1b1a   | Madagascar |
| MF056573 | L3b1a1a   | Madagascar |
| MF056575 | L4b2a     | Madagascar |
| MF056582 | L3b1a1a   | Madagascar |
| MF056587 | L3b1a8    | Madagascar |
| MF056589 | L3b1a1a   | Madagascar |
| MF056591 | L3d1a1a   | Madagascar |
| MF056594 | L2a1a2    | Madagascar |
| MF056702 | L3e1a3a   | Madagascar |
| MF056703 | L3b1a1a   | Madagascar |
| MF056706 | L3e1d1    | Madagascar |
| MF056707 | L2a1a2    | Madagascar |
| MF056709 | L3d1a1a   | Madagascar |
| MF056711 | L2a1a2    | Madagascar |
| MF056712 | L3f1b4a   | Madagascar |
| MF056715 | L2a1b1a   | Madagascar |
| MF056721 | L3b1a1a   | Madagascar |
| MF056724 | L0a2a2a   | Madagascar |
| MF056728 | L3e2b+152 | Madagascar |
| MF056735 | L3d1a1a   | Madagascar |
| MF056741 | L3e2b+152 | Madagascar |
| MF056745 | L3b1a1a   | Madagascar |
| MF056747 | L4b1a     | Madagascar |
| MF056748 | L3e1a1a   | Madagascar |
| MF056749 | L2a1b1a   | Madagascar |
| MF056750 | L2a1a2    | Madagascar |
| MF056753 | L3e1a1a   | Madagascar |
| MF056755 | L3e1a1a   | Madagascar |
| MF056763 | L3e1a1a   | Madagascar |
| MF056764 | L2a1b1a   | Madagascar |
| MF056766 | L3e3a     | Madagascar |
| MF056768 | L3b1a8    | Madagascar |
| MF056776 | L3e3a     | Madagascar |
| MF056777 | L3e1e     | Madagascar |
| MF056780 | L2b1a3    | Madagascar |
| MF056785 | L3b1a8    | Madagascar |

|          |           |            |
|----------|-----------|------------|
| MF056794 | L1c3a     | Madagascar |
| MF056797 | L3e1d1    | Madagascar |
| MF056805 | L3e1d1    | Madagascar |
| MF056810 | L3b1a8    | Madagascar |
| MF056811 | L2a1b1a   | Madagascar |
| MF056814 | L3d1a1a   | Madagascar |
| MF056818 | L3b1a8    | Madagascar |
| MF056819 | L3d1a1a   | Madagascar |
| MF056820 | L1c3b1a   | Madagascar |
| MF056821 | L3b1a1a   | Madagascar |
| MF056936 | L3d1a1a1  | Madagascar |
| MF056940 | L2a1a2    | Madagascar |
| MF056945 | L2a1b1a   | Madagascar |
| MF056946 | L2a1b1a   | Madagascar |
| MF056948 | L1c2a1a   | Madagascar |
| MF056949 | L3b1a11   | Madagascar |
| MF056955 | L3d1a1a1  | Madagascar |
| MF056958 | L3d1a1a   | Madagascar |
| MF056959 | L3e1a3a   | Madagascar |
| MF056960 | L3e1a3a   | Madagascar |
| MF056963 | L3e1d1    | Madagascar |
| MF056965 | L3e1a3a   | Madagascar |
| MF056966 | L3d1a1a   | Madagascar |
| MF056967 | L3d1a1a   | Madagascar |
| MF056969 | L3e1a3a   | Madagascar |
| MF056971 | L2a1b1a   | Madagascar |
| MF056976 | L2a1b1a   | Madagascar |
| MF056979 | L3e1a1a   | Madagascar |
| MF056980 | L2a1b1a   | Madagascar |
| MF056986 | L2a1b1a   | Madagascar |
| MF056987 | L3d1a1a1  | Madagascar |
| MF056991 | L3e2b+152 | Madagascar |
| MF056993 | L3e3b1    | Madagascar |
| MF056994 | L3e1a3a   | Madagascar |
| MF056998 | L2a1a2    | Madagascar |
| MF057002 | L3x1a2    | Madagascar |
| MF057008 | L3e1a1a   | Madagascar |
| MF057011 | L2b2a     | Madagascar |
| MF057013 | L2a1a2    | Madagascar |
| MF057014 | L0a2a2a   | Madagascar |
| MF057019 | L3b1a1a   | Madagascar |
| MF057020 | L3e3a     | Madagascar |
| MF057025 | L2a1a2    | Madagascar |
| MF057026 | L2a1b1a   | Madagascar |
| MF057027 | L3f1b4a1  | Madagascar |
| MF057028 | L2a1b1a   | Madagascar |

|          |           |            |
|----------|-----------|------------|
| MF057029 | L0a2a2a   | Madagascar |
| MF057031 | L3e3a     | Madagascar |
| MF057133 | L2a1b1a   | Madagascar |
| MF057135 | L2a1b1a   | Madagascar |
| MF057137 | L3a+709   | Madagascar |
| MF057138 | L1c2b1a'b | Madagascar |
| MF057141 | L0a2a2a   | Madagascar |
| MF057143 | L2a1b1a   | Madagascar |
| MF057147 | L0a2a2a   | Madagascar |
| MF057148 | L0a2a2a   | Madagascar |
| MF057150 | L0a1b1a1  | Madagascar |
| MF057151 | L2a1a2    | Madagascar |
| MF057153 | L2a1f3    | Madagascar |
| MF057154 | L0d2a'b'd | Madagascar |
| MF057155 | L0d1c     | Madagascar |
| MF057157 | L1c1d     | Madagascar |
| MF057158 | L2a1f3    | Madagascar |
| MF057159 | L3e3a     | Madagascar |
| MF057160 | L2a1f3    | Madagascar |
| MF057161 | L0a2a2a   | Madagascar |
| MF057162 | L0a1b1a1  | Madagascar |
| MF057164 | L3b1a1a   | Madagascar |
| MF057165 | L3b1a1a   | Madagascar |
| MF057166 | L2a1g     | Madagascar |
| MF057168 | L3e3a     | Madagascar |
| MF057171 | L1c3a     | Madagascar |
| MF057172 | L3e3a     | Madagascar |
| MF057175 | L3e1b2    | Madagascar |
| MF057176 | L3b1a1a   | Madagascar |
| MF057177 | L0a2a2a   | Madagascar |
| MF057179 | L3d1a1a   | Madagascar |
| MF057180 | L2a1b1a   | Madagascar |
| MF057181 | L3e3a     | Madagascar |
| MF057182 | L3e1b2    | Madagascar |
| MF057183 | L2a1b1a   | Madagascar |
| MF057184 | L2a1a2    | Madagascar |
| MF057189 | L3e3b2    | Madagascar |
| MF057190 | L2c2b1b   | Madagascar |
| MF057193 | L2a1a     | Madagascar |
| MF057195 | L2a1b1a   | Madagascar |
| MF057277 | L3a+709   | Madagascar |
| MF057279 | L2a1b1a   | Madagascar |
| MF057282 | L2a1b1a   | Madagascar |
| MF057291 | L3e3b1    | Madagascar |
| MF057293 | L3d1a1a1  | Madagascar |
| MF057294 | L3e3b1    | Madagascar |

|          |            |            |
|----------|------------|------------|
| MF057299 | L3b1a1a    | Madagascar |
| MF057300 | L3b1a1a    | Madagascar |
| MF057305 | L0a2a2a    | Madagascar |
| MF057308 | L3d1a1a1   | Madagascar |
| MF057313 | L1c3a      | Madagascar |
| MF057314 | L2a1b1a    | Madagascar |
| MF057315 | L2a1b1a    | Madagascar |
| MF057316 | L2a1h      | Madagascar |
| MF057318 | L3b1a1a    | Madagascar |
| MF057320 | L3e1a3a    | Madagascar |
| MF057325 | L2a1b1a    | Madagascar |
| MF057326 | L3e3a      | Madagascar |
| MF057327 | L3e2b      | Madagascar |
| MF057328 | L3e3b2     | Madagascar |
| MF057329 | L3e3a      | Madagascar |
| MF057332 | L3b1a8     | Madagascar |
| MF057333 | L3d1a1a1   | Madagascar |
| MF057334 | L3d1a1a1   | Madagascar |
| MF057335 | L0a1+16293 | Madagascar |
| MF057336 | L2a1b1a    | Madagascar |
| MF057338 | L2a1a2     | Madagascar |
| MF057339 | L3e1a3a    | Madagascar |
| MF057340 | L2a1b1a    | Madagascar |
| MF057342 | L0a1b1a1   | Madagascar |
| MF057345 | L3e3a      | Madagascar |
| MF057346 | L0a        | Madagascar |
| MF057347 | L0a        | Madagascar |
| MF057348 | L3b1a1a    | Madagascar |
| MF057351 | L3d1a1a1   | Madagascar |
| MF057352 | L3b1a1a    | Madagascar |
| MF057356 | L2a1a2     | Madagascar |
| MF057360 | L1c1d      | Madagascar |
| MF057446 | L3e1a3a    | Madagascar |
| MF057449 | L1c1d      | Madagascar |
| MF057450 | L2a1b1a    | Madagascar |
| MF057451 | L0a2a2a    | Madagascar |
| MF057455 | L2a1b1a    | Madagascar |
| MF057459 | L0a2a2a    | Madagascar |
| MF057460 | L3e1b2     | Madagascar |
| MF057461 | L2a1b1a    | Madagascar |
| MF057464 | L3b1a1a    | Madagascar |
| MF057465 | L2a1b1a    | Madagascar |
| MF057469 | L2a1b1a    | Madagascar |
| MF057470 | L1c1d      | Madagascar |
| MF057472 | L2a1b1a    | Madagascar |
| MF057473 | L2a1a2     | Madagascar |

|          |           |            |          |          |            |
|----------|-----------|------------|----------|----------|------------|
| MF057474 | L2b1a3    | Madagascar | MF057686 | L0a2a2a  | Madagascar |
| MF057475 | L2a1b1a   | Madagascar | MF057692 | L3b1a1a  | Madagascar |
| MF057477 | L2a1b1a   | Madagascar | MF057693 | L0a2a2a  | Madagascar |
| MF057478 | L2a1b1a   | Madagascar | MF057694 | L0a2a2a  | Madagascar |
| MF057480 | L2a1b1a   | Madagascar | MF057696 | L0a2a2a  | Madagascar |
| MF057481 | L3e3a     | Madagascar | MF057698 | L2a1a2   | Madagascar |
| MF057482 | L3b1a1a   | Madagascar | MF057702 | L3b1a1a  | Madagascar |
| MF057487 | L0a2a2a   | Madagascar | MF057708 | L3b1a1a  | Madagascar |
| MF057498 | L3b1a1a   | Madagascar | MF057711 | L2a1a2   | Madagascar |
| MF057501 | L0a2a2a   | Madagascar | MF057712 | L3e1a3a  | Madagascar |
| MF057502 | L0a1b1a1  | Madagascar | MF057713 | L3e1a3a  | Madagascar |
| MF057503 | L3e1a1a   | Madagascar | MF057714 | L3b1a1a  | Madagascar |
| MF057504 | L0a1b1a1  | Madagascar | MF057715 | L3e3a    | Madagascar |
| MF057507 | L3d3a1    | Madagascar | MF057718 | L3b1a1a  | Madagascar |
| MF057508 | L2a1a     | Madagascar | MF057719 | L3e1a3a  | Madagascar |
| MF057509 | L3b1a1a   | Madagascar | MF057720 | L2a1+143 | Madagascar |
| MF057511 | L0a1b1a1  | Madagascar | MF057814 | L3b1a1a  | Madagascar |
| MF057512 | L1c3c     | Madagascar | MF057815 | L2a1b1a  | Madagascar |
| MF057515 | L2a1a2    | Madagascar | MF057818 | L0a1b1a1 | Madagascar |
| MF057517 | L3e2b+152 | Madagascar | MF057820 | L0a2a2a  | Madagascar |
| MF057518 | L3e1d1    | Madagascar | MF057821 | L0a      | Madagascar |
| MF057520 | L3b1a1a   | Madagascar | MF057822 | L3e3a    | Madagascar |
| MF057521 | L1c1d     | Madagascar | MF057824 | L0a2a2a  | Madagascar |
| MF057522 | L3e2b     | Madagascar | MF057828 | L2a1b1a  | Madagascar |
| MF057631 | L3b1a1a   | Madagascar | MF057829 | L3e2b3   | Madagascar |
| MF057633 | L3b1a1a   | Madagascar | MF057831 | L3e1a3a  | Madagascar |
| MF057635 | L0a2a2a   | Madagascar | MF057832 | L1c3a1b  | Madagascar |
| MF057636 | L3e1e1    | Madagascar | MF057833 | L3b1a3   | Madagascar |
| MF057637 | L3e1e1    | Madagascar | MF057834 | L3d1a1a  | Madagascar |
| MF057638 | L2a1b1a   | Madagascar | MF057838 | L3e3a    | Madagascar |
| MF057639 | L2a1a2    | Madagascar | MF057842 | L3e3a    | Madagascar |
| MF057644 | L3d1a1a   | Madagascar | MF057843 | L1c3c    | Madagascar |
| MF057645 | L2a1f     | Madagascar | MF057844 | L3b1a1a  | Madagascar |
| MF057646 | L2a1b1a   | Madagascar | MF057848 | L3b1a8   | Madagascar |
| MF057648 | L2a1b1a   | Madagascar | MF057849 | L0a2a2a  | Madagascar |
| MF057650 | L0a2a2a   | Madagascar | MF057850 | L4b2a1   | Madagascar |
| MF057651 | L3b1a1a   | Madagascar | MF057852 | L3e1     | Madagascar |
| MF057653 | L3d1a1a   | Madagascar | MF057853 | L3d1a1a  | Madagascar |
| MF057655 | L3d1a1a   | Madagascar | MF057854 | L3e1a1a  | Madagascar |
| MF057659 | L3d1a1a   | Madagascar | MF057856 | L3b1a8   | Madagascar |
| MF057664 | L2a1b1a   | Madagascar | MF057857 | L3f1b4a1 | Madagascar |
| MF057667 | L0a1b1a1  | Madagascar | MF057859 | L3f1b4a1 | Madagascar |
| MF057671 | L3d1a1a1  | Madagascar | MF057862 | L3b1a8   | Madagascar |
| MF057679 | L3b1a1a   | Madagascar | MF057863 | L3e1d1   | Madagascar |
| MF057682 | L0a2a2a   | Madagascar | MF057864 | L0a2a2a  | Madagascar |
| MF057683 | L3e3a     | Madagascar | MF057872 | L2a1b1a  | Madagascar |



|          |          |            |
|----------|----------|------------|
| MF057874 | L3e1a3a  | Madagascar |
| MF057877 | L3e1a3a  | Madagascar |
| MF057879 | L2a1a3c  | Madagascar |
| MF057882 | L3d1a1a1 | Madagascar |
| MF057884 | L2b1a3   | Madagascar |
| MF057885 | L3e1a3a  | Madagascar |
| MF057887 | L0a2a2a  | Madagascar |
| MF057889 | L3e3a    | Madagascar |
| MF057981 | L3h1a2   | Madagascar |
| MF057985 | L3d1a1a  | Madagascar |
| MF057986 | L3b1a1a  | Madagascar |
| MF057987 | L0a1b1a1 | Madagascar |
| MF057994 | L3b1a8   | Madagascar |
| MF058012 | L1c3c    | Madagascar |
| MF058013 | L3e3b1   | Madagascar |
| MF058018 | L2a1b1a  | Madagascar |
| MF058021 | L3a+709  | Madagascar |
| MF058025 | L3f      | Madagascar |
| MF058026 | L3e3a    | Madagascar |
| MF058030 | L3b1a1a  | Madagascar |
| MF058032 | L3b1a1a  | Madagascar |
| MF058038 | L3e3b1   | Madagascar |
| MF058039 | L3e3b1   | Madagascar |
| MF058040 | L2a1b1a  | Madagascar |
| MF058043 | L2a1a3c  | Madagascar |
| MF058044 | L2a1b1a  | Madagascar |
| MF058048 | L3b1a1a  | Madagascar |
| MF058049 | L2a1b1a  | Madagascar |
| MF058051 | L3b1a1a  | Madagascar |
| MF058052 | L0a1b1a1 | Madagascar |
| MF058054 | L2a1b1a  | Madagascar |
| MF058055 | L2a1b1a  | Madagascar |
| MF058059 | L3a+709  | Madagascar |
| MF058061 | L3d1a1a  | Madagascar |
| MF058066 | L0a2a2a  | Madagascar |
| MF058067 | L0a2a2a  | Madagascar |
| MF058069 | L1c2a3a  | Madagascar |
| MF058070 | L3e3b1   | Madagascar |
| MF058071 | L3e1a3a  | Madagascar |
| MF058072 | L2a1b1a  | Madagascar |
| MF058074 | L3e3a    | Madagascar |
| MF058075 | L3e1b2   | Madagascar |
| MF058077 | L1c3b1a  | Madagascar |
| MF058078 | L2a1b1a  | Madagascar |
| MF058079 | L3e1a1a  | Madagascar |
| MF058081 | L3b1a8   | Madagascar |

|          |          |            |
|----------|----------|------------|
| MF058140 | L3b1a1a  | Madagascar |
| MF058142 | L2b1a3   | Madagascar |
| MF058144 | L2a1b1a  | Madagascar |
| MF058145 | L3b1a1a  | Madagascar |
| MF058146 | L1c2a1a  | Madagascar |
| MF058147 | L2a1b1a  | Madagascar |
| MF058149 | L3d1a1a1 | Madagascar |
| MF058152 | L3e1d1   | Madagascar |
| MF058153 | L2a1b1a  | Madagascar |
| MF058154 | L1c3c    | Madagascar |
| MF058155 | L2a1b1a  | Madagascar |
| MF058157 | L3k1     | Madagascar |
| MF058158 | L2a5     | Madagascar |
| MF058159 | L2a1g    | Madagascar |
| MF058161 | L3e1d1   | Madagascar |
| MF058162 | L2a1b1a  | Madagascar |
| MF058163 | L0a1b1a1 | Madagascar |
| MF058165 | L3e1a3a  | Madagascar |
| MF058166 | L1c2a1a  | Madagascar |
| MF058167 | L3e1a3a  | Madagascar |
| MF058168 | L3e2b1a2 | Madagascar |
| MF058169 | L3e3b1   | Madagascar |
| MF058170 | L3e2b1a2 | Madagascar |
| MF058173 | L3e3a    | Madagascar |
| MF058174 | L3b1a1a  | Madagascar |
| MF058176 | L3d1a1a  | Madagascar |
| MF058177 | L1c2a1a  | Madagascar |
| MF058179 | L4b2a1   | Madagascar |
| MF058182 | L0a2     | Madagascar |
| MF058183 | L2a1a    | Madagascar |
| MF058184 | L4b2a1   | Madagascar |
| MF058185 | L4b2a1   | Madagascar |
| MF058187 | L3d1a1a  | Madagascar |
| MF058188 | L0a2     | Madagascar |
| MF058190 | L3d1a1a1 | Madagascar |
| MF058191 | L0a2a2a  | Madagascar |
| MF058193 | L2b2a    | Madagascar |
| MF058194 | L3k1     | Madagascar |
| MF058276 | L3b1a1a  | Madagascar |
| MF058281 | L3b1a1a  | Madagascar |
| MF058287 | L3b1a1a  | Madagascar |
| MF058288 | L3e1e1   | Madagascar |
| MF058289 | L0a2a2a  | Madagascar |
| MF058292 | L1c1     | Madagascar |
| MF058293 | L3e3b1   | Madagascar |
| MF058296 | L2a1b1a  | Madagascar |



|          |           |            |
|----------|-----------|------------|
| MF058308 | L3b1a1a   | Madagascar |
| MF058309 | L3e1a3a   | Madagascar |
| MF058310 | L3b1a1a   | Madagascar |
| MF058313 | L3e3a     | Madagascar |
| MF058318 | L3d1a1a   | Madagascar |
| MF058322 | L0a1b1a1  | Madagascar |
| MF058330 | L0a1b1a1  | Madagascar |
| MF058335 | L0a2a1a   | Madagascar |
| MF058339 | L3b1a1a   | Madagascar |
| MF058340 | L2a1b1a   | Madagascar |
| MF058341 | L3d1a1a1  | Madagascar |
| MF058342 | L3b1a1a   | Madagascar |
| MF058345 | L2a1b1a   | Madagascar |
| MF058346 | L2a1b1a   | Madagascar |
| MF058350 | L3b1a1a   | Madagascar |
| MF058352 | L3b1a1a   | Madagascar |
| MF058355 | L3e3a     | Madagascar |
| MF058356 | L3b1a1a   | Madagascar |
| MF058363 | L1c3a     | Madagascar |
| MF058365 | L0a2a2a   | Madagascar |
| MF058366 | L3d1a1a   | Madagascar |
| MF058367 | L3d1a1a   | Madagascar |
| MF058368 | L3e1a3a   | Madagascar |
| MF058371 | L4b2a1    | Madagascar |
| MF058373 | L3e2b+152 | Madagascar |
| MF058374 | L2a1b1a   | Madagascar |
| MF058375 | L3b1a8    | Madagascar |
| MF058382 | L4b2a1    | Madagascar |
| MF058383 | L3b1a1a   | Madagascar |
| MF058384 | L2a1a2    | Madagascar |
| MF058472 | L3b1a1a   | Madagascar |
| MF058479 | L3b1a1a   | Madagascar |
| MF058483 | L3b1a1a   | Madagascar |
| MF058486 | L3b1a1a   | Madagascar |
| MF058490 | L3b1a1a   | Madagascar |
| MF058498 | L3e2b3    | Madagascar |
| MF058505 | L3e1a3a   | Madagascar |
| MF058506 | L3b1a1a   | Madagascar |
| MF058507 | L0a2a2a   | Madagascar |
| MF058509 | L2a1a2    | Madagascar |
| MF058511 | L2a1b1a   | Madagascar |
| MF058515 | L2a1a2    | Madagascar |
| MF058521 | L0a2a2a   | Madagascar |
| MF058525 | L1c3c     | Madagascar |
| MF058528 | L3e3b1    | Madagascar |
| MF058529 | L2a1f     | Madagascar |
| MF058530 | L0a2a2a   | Madagascar |
| MF058531 | L3e3a     | Madagascar |
| MF058533 | L0a2a2a   | Madagascar |
| MF058535 | L0f       | Madagascar |
| MF058536 | L1c3c     | Madagascar |
| MF058537 | L3b1a1a   | Madagascar |
| MF058539 | L0a2a2a   | Madagascar |
| MF058540 | L2a1b1a   | Madagascar |
| MF058541 | L2a1b1a   | Madagascar |
| MF058544 | L3e1e     | Madagascar |
| MF058545 | L3e3a     | Madagascar |
| MF058546 | L3e3a     | Madagascar |
| MF058547 | L3e3a     | Madagascar |
| MF058549 | L3d1a1a   | Madagascar |
| MF058550 | L3e3a     | Madagascar |
| MF058552 | L3e2b+152 | Madagascar |
| MF058553 | L2a1f3    | Madagascar |
| MF058555 | L0a2a2a   | Madagascar |
| MF058557 | L3e3b1    | Madagascar |
| MF058559 | L3e1a1a   | Madagascar |
| MF058560 | L1c3c     | Madagascar |
| MF058561 | L3e3a     | Madagascar |
| MF381309 | L1c1b     | Angola     |
| MF381310 | L3d3a1a   | Angola     |
| MF381311 | L3e1a2    | Angola     |
| MF381312 | L3f1b4a   | Angola     |
| MF381313 | L0a1b1    | Angola     |
| MF381314 | L1c1b     | Angola     |
| MF381315 | L3e1a2    | Angola     |
| MF381316 | L1c1b     | Angola     |
| MF381317 | L3d3a1a   | Angola     |
| MF381318 | L0a1b1    | Angola     |
| MF381319 | L0a1b1    | Angola     |
| MF381320 | L0d1b1b1  | Angola     |
| MF381321 | L3e1a2    | Angola     |
| MF381322 | L3d3a1a   | Angola     |
| MF381323 | L1c1b     | Angola     |
| MF381324 | L3d3a1a   | Angola     |
| MF381325 | L3e1a2    | Angola     |
| MF381326 | L1c1b     | Angola     |
| MF381327 | L1c1b     | Angola     |
| MF381328 | L3e1a2    | Angola     |
| MF381329 | L3e1a2    | Angola     |
| MF381330 | L3d3a1a   | Angola     |
| MF381331 | L3f1b4a   | Angola     |
| MF381332 | L3e1a2    | Angola     |

|          |             |        |
|----------|-------------|--------|
| MF381333 | L3d3a1a     | Angola |
| MF381334 | L3e1a2      | Angola |
| MF381335 | L0a1b1      | Angola |
| MF381336 | L3d3a1a     | Angola |
| MF381337 | L3d3a1a     | Angola |
| MF381338 | L0a2a1b     | Angola |
| MF381339 | L3e1a2      | Angola |
| MF381340 | L3d3a1a     | Angola |
| MF381341 | L3d3a1a     | Angola |
| MF381342 | L3d3a1a     | Angola |
| MF381343 | L3d3a1a     | Angola |
| MF381344 | L3d3a1a     | Angola |
| MF381345 | L3f1b4a     | Angola |
| MF381346 | L3d3a1a     | Angola |
| MF381385 | L1c1b       | Angola |
| MF381386 | L0a1b1      | Angola |
| MF381387 | L1c1b       | Angola |
| MF381388 | L1c2a1a     | Angola |
| MF381389 | L0d1b1b1    | Angola |
| MF381390 | L1c2a1a     | Angola |
| MF381391 | L3f1b4a     | Angola |
| MF381392 | L0d1a1b1a   | Angola |
| MF381393 | L0d1a1b1a   | Angola |
| MF381394 | L0d1b1b1    | Angola |
| MF381395 | L3f1b4a     | Angola |
| MF381396 | L0d1a1b1a   | Angola |
| MF381397 | L0d1a1b1a   | Angola |
| MF381398 | L0d1b1b1    | Angola |
| MF381399 | L0d1a1b1a   | Angola |
| MF381400 | L0d1b1b1    | Angola |
| MF381401 | L0d1a1b1a   | Angola |
| MF381402 | L1c1b       | Angola |
| MF381403 | L3f1b4a     | Angola |
| MF381404 | L3f1b4a     | Angola |
| MF381405 | L0d1a1b1a   | Angola |
| MF381406 | L0d1a1b1a   | Angola |
| MF381407 | L0d1b1b1    | Angola |
| MF381408 | L2a1c1      | Angola |
| MF381409 | L3e2b       | Angola |
| MF381410 | L3e4a       | Angola |
| MF381411 | L0d1a1b1a   | Angola |
| MF381412 | L0d1a1b1a   | Angola |
| MF381413 | L0d1a1b1a   | Angola |
| MF381414 | L3f1b4a     | Angola |
| MF381415 | L3e1a2      | Angola |
| MF381416 | L3d3a1a     | Angola |
| MF381417 | L3d3a1a     | Angola |
| MF381418 | L3f1b4a     | Angola |
| MF381419 | L0a1b1      | Angola |
| MF381420 | L3f1b4a     | Angola |
| MF381421 | L3f1b4a     | Angola |
| MF381422 | L1c1b       | Angola |
| MF381461 | L0a2a1b     | Angola |
| MF381462 | L3f1b4a     | Angola |
| MF381463 | L3f1b4a     | Angola |
| MF381464 | L0a1b1      | Angola |
| MF381465 | L0a2a1b     | Angola |
| MF381466 | L0a2a1b     | Angola |
| MF381467 | L1c1b       | Angola |
| MF381468 | L0a2a1b     | Angola |
| MF381469 | L0a1b1      | Angola |
| MF381470 | L3d3a1a     | Angola |
| MF381471 | L3d3a1a     | Angola |
| MF381472 | L0d1b1b1    | Angola |
| MF381473 | L3f1b4a     | Angola |
| MF381474 | L0a2a1b     | Angola |
| MF381475 | L3d3a1a     | Angola |
| MF381476 | L3d3a1a     | Angola |
| MF381477 | L0a1b1      | Angola |
| MF381478 | L3d3a1a     | Angola |
| MF381479 | L3f1b4a     | Angola |
| MF381480 | L0a1b2      | Angola |
| MF381481 | L3e2b       | Angola |
| MF381482 | L0a1b2      | Angola |
| MF381483 | L0a1b2      | Angola |
| MF381484 | L0a2a1b     | Angola |
| MF381485 | L3f1b4a     | Angola |
| MF381486 | L0d1b1b1    | Angola |
| MF381487 | L0d1a1b1a   | Angola |
| MF381488 | L1c1b       | Angola |
| MF381489 | L3f1b4a     | Angola |
| MF381490 | L0a2a1b     | Angola |
| MF381491 | L1c1b       | Angola |
| MF381492 | L0d1b1b1    | Angola |
| MF381493 | L0a2a1b     | Angola |
| MF381494 | L0d1b1b1    | Angola |
| MF381495 | L0d1b1+@152 | Angola |
| MF381496 | L0a1b2      | Angola |
| MF381497 | L0d1b1b1    | Angola |
| MF381498 | L0d1b1b1    | Angola |
| MF381537 | L0d1c1a1a   | Angola |
| MF381538 | L0d2a1a     | Angola |

|          |                |                   |
|----------|----------------|-------------------|
| MF381539 | L0k1a1a        | Angola            |
| MF381540 | L0k1a1b        | Angola            |
| MF381541 | L0d2a1a        | Angola            |
| MF381542 | L0d2a1a        | Angola            |
| MF381543 | L0d1b2b1a      | Angola            |
| MF381544 | L0d2a1a        | Angola            |
| MF381545 | L0d1c1a1b      | Angola            |
| MF381546 | L0d1c1a1a      | Angola            |
| MF381547 | L0d2a1a        | Angola            |
| MF381548 | L3d3a1         | Angola            |
| MF381549 | L0d1c1a1a      | Angola            |
| MF381550 | L0k1a1         | Angola            |
| MF381551 | L0d1c1a1a      | Angola            |
| MF381552 | L0k1a1         | Angola            |
| MF381553 | L0d1c1a1a      | Angola            |
| MF381554 | L0d1b1a        | Angola            |
| MF381555 | L0d2a1a        | Angola            |
| MF381556 | L0d2a1a        | Angola            |
| MF381557 | L0d2a1a        | Angola            |
| MF381558 | L0d1c1a1a      | Angola            |
| MF381559 | L0d1c1a1a      | Angola            |
| MF381560 | L0d2a1a        | Angola            |
| MF381561 | L0d1c1a1b      | Angola            |
| MF381562 | L0k1a1a        | Angola            |
| MF381563 | L0d2a1a        | Angola            |
| MF381564 | L0k1a1a        | Angola            |
| MF381565 | L0d2a1a        | Angola            |
| MF381566 | L0k1a1b        | Angola            |
| MF381567 | L0d1c1a1b      | Angola            |
| MF381568 | L0d1c1a1a      | Angola            |
| MF381569 | L0d2a1a        | Angola            |
| MF381570 | L0d2a1a        | Angola            |
| MF381571 | L0d1c1a1b      | Angola            |
| MF381572 | L0d1b2a1       | Angola            |
| MF381573 | L0d1c1a1a      | Angola            |
| MF381574 | L0d1c1a1a      | Angola            |
| MF621094 | L3x2b          | Spain             |
| MF621095 | L3x2a1a        | Jordan            |
| MF621096 | L3h1a1         | Sudan             |
| MF621097 | L3h1a1         | Sudan             |
| MF621098 | L3h1a1         | Sudan             |
| MF621099 | L3h1a2a1       | Tunisia           |
| MF621100 | L3h1a2a1       | Kenya             |
| MF621101 | L3h1a2a1       | Sudan             |
| MF621102 | L3h1a2a1       | Kenya             |
| MF621103 | L3h1a2a1       | Sudan             |
| MF621104 | L3h1a2b        | Sudan             |
| MF621105 | L3h1a2b        | Sudan             |
| MF621106 | L3h1b1a        | Saudi Arabia      |
| MF621107 | L3h1b2         | Saudi Arabia      |
| MF621108 | L4a1a          | Saudi Arabia      |
| MF621109 | L4a2           | Saudi Arabia      |
| MF621110 | L4a2           | Rwanda            |
| MF621111 | L4b1a          | Ivory Coast       |
| MF621112 | L4b1           | Sudan             |
| MF621113 | L4b1           | Sudan             |
| MF621114 | L4b1           | Kenya             |
| MF621115 | L4b1           | Sudan             |
| MF621116 | L4b1           | Sudan             |
| MF621117 | L4b1           | Sudan             |
| MF621118 | L4b2a1         | Saudi Arabia      |
| MF621119 | L4b2b          | Equatorial Guinea |
| MF621120 | L2a1c2a        | Ghana             |
| MF621121 | L2a1c3b        | Sudan             |
| MF621122 | L2a1+143+16189 | Saudi Arabia      |
| MF621123 | L2b1a3         | Nigeria           |
| MF621124 | L2d+16129      | Mauritania        |
| MF621125 | L5a1a          | Tanzania          |
| MF621127 | L1b2a          | Nigeria           |
| MF621128 | L1c1a1a1b1     | Equatorial Guinea |
| MF621129 | L1c2a1b        | Nigeria           |
| MF621130 | L0a1b1         | Morocco           |
| MF695863 | L3e3a          | Kenya             |
| MF695864 | L0a2a1b        | Kenya             |
| MF695905 | L0a2a2a        | Kenya             |
| MF695906 | L2a1h          | Kenya             |
| MF695907 | L0a2a2a        | Kenya             |
| MF695908 | L1b1a          | Kenya             |
| MF695909 | L0a1'4         | Kenya             |
| MF695910 | L3d1a1a1       | Kenya             |
| MF695911 | L0a            | Kenya             |
| MF695912 | L2a1+143       | Kenya             |
| MF695913 | L3d1a1a        | Kenya             |
| MF695914 | L3d1a1a1       | Kenya             |
| MF695915 | L0a1b1a1a      | Kenya             |
| MF695916 | L2a1b1a        | Kenya             |
| MF695917 | L2a1b1a        | Kenya             |
| MF695918 | L0a2           | Kenya             |
| MF695919 | L2a1+143       | Kenya             |
| MF695920 | L3d1a1a1       | Kenya             |
| MF695921 | L3e3a          | Kenya             |
| MF695922 | L4b2a2         | Kenya             |

|          |          |       |
|----------|----------|-------|
| MF695923 | L0a2a2a  | Kenya |
| MF695924 | L3e3a    | Kenya |
| MF695925 | L3e3a    | Kenya |
| MF695926 | L4b2a2   | Kenya |
| MF695927 | L3e3a    | Kenya |
| MF695928 | L4b2a2   | Kenya |
| MF695929 | L2b2a    | Kenya |
| MF695930 | L3d1a1a1 | Kenya |
| MF695931 | L0a2a2a  | Kenya |
| MF695932 | L0f2a    | Kenya |
| MF695933 | L3e1e1   | Kenya |
| MF695934 | L0a2a2a  | Kenya |
| MF695936 | L3e3a    | Kenya |
| MF695937 | L0a2a2a  | Kenya |
| MF695938 | L2a1b1a  | Kenya |
| MF695939 | L3e1d1   | Kenya |
| MF695940 | L3e3a    | Kenya |
| MF695941 | L3e1d1   | Kenya |
| MF695942 | L2a1h    | Kenya |
| MF695943 | L3e3a    | Kenya |
| MF695983 | L1c2a3   | Kenya |
| MF695984 | L3d1a1a  | Kenya |
| MF695985 | L0a2a2a  | Kenya |
| MF695986 | L0a      | Kenya |
| MF695987 | L3f      | Kenya |
| MF695988 | L3b1a1a  | Kenya |
| MF695989 | L4b2a2   | Kenya |
| MF695991 | L2a5     | Kenya |
| MF695992 | L3b1a2   | Kenya |
| MF695993 | L0f2a    | Kenya |
| MF695994 | L3b1a2   | Kenya |
| MF695995 | L2a1b1a  | Kenya |
| MF695996 | L3h1a2a1 | Kenya |
| MF695997 | L3d1a1a  | Kenya |
| MF695998 | L3e3a    | Kenya |
| MF695999 | L0f2a    | Kenya |
| MF696000 | L0f2a    | Kenya |
| MF696001 | L3d1a1a  | Kenya |
| MF696003 | L3b1a1a  | Kenya |
| MF696004 | L0a2a2a  | Kenya |
| MF696005 | L3f1b4a1 | Kenya |
| MF696006 | L1b1a    | Kenya |
| MF696007 | L3b1a1a  | Kenya |
| MF696008 | L3d1a1a  | Kenya |
| MF696009 | L3d1a1a  | Kenya |
| MF696010 | L3b1a1a  | Kenya |

|          |                 |         |
|----------|-----------------|---------|
| MF696011 | L0a2a2a         | Kenya   |
| MF696012 | L3b1a1a         | Kenya   |
| MF696013 | L3d1a1a1        | Kenya   |
| MF696014 | L3d1a1a1        | Kenya   |
| MF696015 | L0a2a2a         | Kenya   |
| MF696016 | L3e1a2          | Kenya   |
| MF696017 | L0a2a2a         | Kenya   |
| MF696018 | L2a1h           | Kenya   |
| MF696019 | L1b1a           | Kenya   |
| MF696020 | L2a1b1a         | Kenya   |
| MF696021 | L2a1h           | Kenya   |
| MF696022 | L3e3a           | Kenya   |
| MF696062 | L1b1a           | Kenya   |
| MF696063 | L1b1a           | Kenya   |
| MF696064 | L0f             | Kenya   |
| MF696065 | L1b1a           | Kenya   |
| MF696066 | L3e3a           | Kenya   |
| MF696067 | L2a1+143+@16309 | Kenya   |
| MF696068 | L4b2a2c         | Kenya   |
| MF696069 | L0d3            | Kenya   |
| MF696070 | L3d1a1a         | Kenya   |
| MF696071 | L3h1b2          | Kenya   |
| MF696072 | L1b1a           | Kenya   |
| MF696073 | L3h1a2a1        | Kenya   |
| MF696074 | L2a1f           | Kenya   |
| MF696075 | L0a2a2a         | Kenya   |
| MF696076 | L3x1a2          | Kenya   |
| MF696078 | L0f2a           | Kenya   |
| MF696079 | L3d1a1a         | Kenya   |
| MF696080 | L0a2a2a         | Kenya   |
| MF696081 | L0a2a2a         | Kenya   |
| MF696082 | L3e1a2          | Kenya   |
| MF696083 | L2a1b1a         | Kenya   |
| MF696085 | L3d1a1a         | Kenya   |
| MF696086 | L5b2            | Kenya   |
| MF696087 | L3e2b           | Kenya   |
| MF696088 | L0a2a2a         | Kenya   |
| MF696089 | L3d1a1a         | Kenya   |
| MF696090 | L0a2d           | Kenya   |
| MF696091 | L0a2a1a         | Comoros |
| MF696092 | L1c2a1a         | Comoros |
| MF696093 | L1c2b2          | Comoros |
| MF696094 | L3d1a1a1        | Comoros |
| MF696095 | L3e3a           | Comoros |
| MF696096 | L2c2b1b         | Comoros |
| MF696097 | L2a5            | Comoros |

|          |              |                    |
|----------|--------------|--------------------|
| MF696098 | L2a5         | Comoros            |
| MF696099 | L3b1a1a      | Comoros            |
| MF696100 | L2a1f3       | Comoros            |
| MF696102 | L3d1a1a1     | Comoros            |
| MG022094 | L3d1b2       | USA                |
| MG182028 | L3e2b1       | Algeria            |
| MG182030 | L2a1a        | Algeria            |
| MG201854 | L0d1a1d      | South Africa       |
| MG561401 | L3e2a        | Sweden             |
| MG571168 | L3e1a1a      | Peru               |
| MG609035 | L3f1b        | USA                |
| MH043563 | L2c          | Ibiza              |
| MH043576 | L2c          | Ibiza              |
| MH161386 | L1b1a        | USA                |
| MH644539 | L3e3b1       | Brazil             |
| MH681106 | L3d6         | USA                |
| MH980013 | L3b1a+@16124 | Dominican Republic |
| MH981600 | L2a1b1a      | South Africa       |
| MH981601 | L0a2a2a      | South Africa       |
| MH981602 | L0a1b1a1     | South Africa       |
| MH981603 | L0a2a2a      | South Africa       |
| MH981604 | L0d1c        | South Africa       |
| MH981605 | L2a1b1a      | South Africa       |
| MH981606 | L3d1a1a1     | South Africa       |
| MH981607 | L0f1         | South Africa       |
| MH981608 | L3b1a11      | South Africa       |
| MH981609 | L2b2a        | South Africa       |
| MH981610 | L1c2a3a      | South Africa       |
| MH981611 | L0d1c        | South Africa       |
| MH981612 | L3e2b1a2     | South Africa       |
| MH981613 | L0a1b1a1     | South Africa       |
| MH981614 | L0d1b2b1b    | South Africa       |
| MH981615 | L2a1b1a      | South Africa       |
| MH981616 | L1c1         | South Africa       |
| MH981618 | L1c2a3a      | South Africa       |
| MH981619 | L0a2a1a2     | South Africa       |
| MH981620 | L3e1a1a      | South Africa       |
| MH981621 | L0a2a2a      | South Africa       |
| MH981622 | L0d1b2b2a    | South Africa       |
| MH981624 | L0d1b2b1b    | South Africa       |
| MH981626 | L0a2a2a      | South Africa       |
| MH981627 | L3e2b1a2     | South Africa       |
| MH981671 | L0d1b2b2a    | South Africa       |
| MH981672 | L2a1b1a      | South Africa       |
| MH981673 | L0a1b1a1     | South Africa       |
| MH981674 | L0a2a2a      | South Africa       |
| MH981675 | L3e1a3a      | South Africa       |
| MH981676 | L2a1b1a      | South Africa       |
| MH981677 | L0a2a2a      | South Africa       |
| MH981678 | L0d2a1       | South Africa       |
| MH981679 | L2a1a2a1a    | South Africa       |
| MH981680 | L2a1b1a      | South Africa       |
| MH981681 | L2a1h        | South Africa       |
| MH981682 | L2a1b1a      | South Africa       |
| MH981684 | L3e1b2       | South Africa       |
| MH981685 | L1c2a3a      | South Africa       |
| MH981686 | L3d1a1a1     | South Africa       |
| MH981836 | L1c1a2       | Paraguay           |
| MH981841 | L3e2a1b1     | Paraguay           |
| MH981849 | L1b1a12a     | Paraguay           |
| MH981851 | L2b1b        | Paraguay           |
| MH981854 | L1c1b        | Paraguay           |
| MH981867 | L3e1a1a      | Paraguay           |
| MH981878 | L1b1a12a     | Paraguay           |
| MK049276 | L3a2a        | Somalia            |
| MK139597 | L1b1a+189    | Spain              |
| MK139598 | L3b1a+@16124 | Spain              |
| MK139630 | L3d1b3a      | Spain              |
| MK139649 | L3b1a+@16124 | Spain              |
| MK228971 | L2b2a        | USA                |
| MK295855 | L0a1a1       | Bulgaria           |
| MK321329 | L2a1l        | Spain              |
| MK484611 | L4a1         | Somalia            |
| MK572004 | L3h1b1a      | Libya              |
| MK732938 | L2e          | Uganda             |
| NA18486  | L1b1a        | Nigeria            |
| NA18487  | L2a1l3       | Nigeria            |
| NA18488  | L3e2b8       | Nigeria            |
| NA18489  | L2a1a        | Nigeria            |
| NA18498  | L1b1a3b      | Nigeria            |
| NA18917  | L1b1a+189    | Nigeria            |
| NA18921  | L2b2         | Nigeria            |
| NA18923  | L1b1a3       | Nigeria            |
| NA18924  | L1b1a3a      | Nigeria            |
| NA18933  | L1b1a15      | Nigeria            |
| NA18934  | L3e2a1b1     | Nigeria            |
| NA19017  | L3b1a1a      | Kenya              |
| NA19019  | L5a1b        | Kenya              |
| NA19020  | L3e2a        | Kenya              |
| NA19022  | L3b1a1a      | Kenya              |
| NA19023  | L2a1f        | Kenya              |
| NA19024  | L2b1a3       | Kenya              |

|         |           |         |
|---------|-----------|---------|
| NA19026 | L3b1a1a   | Kenya   |
| NA19027 | L0a1a+200 | Kenya   |
| NA19028 | L2a5      | Kenya   |
| NA19030 | L3d1a1a1  | Kenya   |
| NA19031 | L0b       | Kenya   |
| NA19035 | L3e1a3a   | Kenya   |
| NA19036 | L3b1a1a   | Kenya   |
| NA19037 | L3h1a1    | Kenya   |
| NA19038 | L3h1a2a1  | Kenya   |
| NA19039 | L0a3      | Kenya   |
| NA19041 | L1b1a     | Kenya   |
| NA19042 | L0a1a+200 | Kenya   |
| NA19043 | L5b2      | Kenya   |
| NA19044 | L3b1a1a   | Kenya   |
| NA19045 | L2a5      | Kenya   |
| NA19046 | L2a5      | Kenya   |
| NA19092 | L3e2a1b   | Nigeria |
| NA19093 | L2a1c5    | Nigeria |
| NA19095 | L2a1a2    | Nigeria |
| NA19096 | L2a1c3b2  | Nigeria |
| NA19098 | L3b1a+152 | Nigeria |
| NA19099 | L2a1m1a   | Nigeria |
| NA19102 | L2a1a1    | Nigeria |
| NA19107 | L3b2a     | Nigeria |
| NA19108 | L2e1a     | Nigeria |
| NA19113 | L3e2b+152 | Nigeria |
| NA19187 | L4b2b1    | Nigeria |
| NA19189 | L2a1f     | Nigeria |
| NA19190 | L1b1a15   | Nigeria |
| NA19195 | L3e2a1b2  | Nigeria |
| NA19196 | L3e2a1b1  | Nigeria |
| NA19197 | L2b2      | Nigeria |
| NA19198 | L1b1a15a  | Nigeria |
| NA19200 | L3e3b     | Nigeria |
| NA19201 | L2e1      | Nigeria |
| NA19204 | L3e2a     | Nigeria |
| NA19207 | L1b1a3    | Nigeria |
| NA19209 | L2b1b     | Nigeria |
| NA19210 | L1b1a3    | Nigeria |
| NA19213 | L3f1b3    | Nigeria |
| NA19214 | L3e2a1b1  | Nigeria |
| NA19216 | L0a1a2    | Nigeria |
| NA19217 | L3e1      | Nigeria |
| NA19220 | L3d1      | Nigeria |
| NA19222 | L3b1a8    | Nigeria |
| NA19223 | L1b1a3    | Nigeria |
| NA19228 | L2a1c2a   | Nigeria |
| NA19229 | L2c2      | Nigeria |
| NA19235 | L3e2b+152 | Nigeria |
| NA19236 | L3e2b+152 | Nigeria |
| NA19238 | L3e2b5    | Nigeria |
| NA19239 | L2a1p     | Nigeria |
| NA19247 | L2b       | Nigeria |
| NA19248 | L2b3a     | Nigeria |
| NA19250 | L1b1a3a1  | Nigeria |
| NA19253 | L2b2a     | Nigeria |
| NA19256 | L1c3b2    | Nigeria |
| NA19257 | L3b1a10   | Nigeria |
| NA19259 | L4b2b     | Nigeria |
| NA19260 | L3e3b     | Nigeria |
| NA19262 | L3d1b2    | Nigeria |
| NA19266 | L2a1a1    | Nigeria |
| NA19307 | L3b1a1a   | Kenya   |
| NA19308 | L5a1a     | Kenya   |
| NA19382 | L0a1b1a1a | Kenya   |
| NA19383 | L4b1      | Kenya   |
| NA19384 | L3h1b1a   | Kenya   |
| NA19385 | L1c1d     | Kenya   |
| NA19390 | L1c3b1a   | Kenya   |
| NA19391 | L3e1e     | Kenya   |
| NA19392 | L2b1a3    | Kenya   |
| NA19393 | L2a4b     | Kenya   |
| NA19395 | L2a1f     | Kenya   |
| NA19396 | L3b1a1a   | Kenya   |
| NA19397 | L3b1a1a   | Kenya   |
| NA19398 | L3f2a1    | Kenya   |
| NA19399 | L3e1e     | Kenya   |
| NA19401 | L3x1a2    | Kenya   |
| NA19402 | L0a2a2a   | Kenya   |
| NA19404 | L5b1b     | Kenya   |
| NA19428 | L3b1a1a   | Kenya   |
| NA19429 | L3b1a1a   | Kenya   |
| NA19430 | L0a1a2    | Kenya   |
| NA19431 | L1b1a     | Kenya   |
| NA19432 | L4b2a2c   | Kenya   |
| NA19434 | L4b2a2c   | Kenya   |
| NA19435 | L4b2a2c   | Kenya   |
| NA19436 | L3b1a1a   | Kenya   |
| NA19437 | L3i1      | Kenya   |
| NA19438 | L3a2      | Kenya   |
| NA19439 | L3b1a1a   | Kenya   |
| NA19440 | L0a1c     | Kenya   |

|         |           |       |
|---------|-----------|-------|
| NA19443 | L2a2b1    | Kenya |
| NA19444 | L4b2a2c   | Kenya |
| NA19445 | L4b2a2c   | Kenya |
| NA19446 | L3x1a1    | Kenya |
| NA19448 | L0a1b1a1a | Kenya |
| NA19449 | L0a1b1a1a | Kenya |
| NA19451 | L3b1a1a   | Kenya |
| NA19452 | L2a1a2    | Kenya |
| NA19453 | L4b2a2c   | Kenya |
| NA19454 | L0f1      | Kenya |
| NA19921 | L3e2a     | USA   |
| NA19922 | L3d3a1    | USA   |
| NA19923 | L2a1c3a1  | USA   |
| NA19984 | L2b1a3    | USA   |
| NA19985 | L0a2a2a1  | USA   |
| NA20126 | L2a1f1    | USA   |
| NA20127 | L2c5      | USA   |
| NA20274 | L2a1b+143 | USA   |
| NA20276 | L2a1a3a   | USA   |
| NA20278 | L3e2a1b1  | USA   |
| NA20281 | L1c1d1    | USA   |
| NA20282 | L1b1a     | USA   |
| NA20287 | L2a1a2a1  | USA   |
| NA20289 | L1b1a4a   | USA   |
| NA20291 | L3e4a     | USA   |
| NA20294 | L3d1b3a   | USA   |
| NA20296 | L3d4      | USA   |
| NA20298 | L3k       | USA   |
| NA20317 | L3d4      | USA   |
| NA20318 | L3d4      | USA   |
| NA20320 | L1b1a4    | USA   |
| NA20321 | L1b1a4    | USA   |
| NA20322 | L1b1a4    | USA   |
| NA20332 | L2a1l1b   | USA   |
| NA20334 | L0a1a2    | USA   |
| NA20336 | L0a1a2    | USA   |
| NA20339 | L3d1c1    | USA   |
| NA20340 | L2a1a1    | USA   |
| NA20341 | L1b1a4a   | USA   |
| NA20342 | L3e2b+152 | USA   |
| NA20344 | L3e2b1a1  | USA   |
| NA20346 | L3e2b1a1  | USA   |
| NA20348 | L3e2b1a1  | USA   |
| NA20351 | L2a1c1a2  | USA   |
| NA20355 | L0a1a2    | USA   |
| NA20357 | L2a1e1    | USA   |

|          |            |              |
|----------|------------|--------------|
| NA20359  | L1c3a      | USA          |
| NA20362  | L1c3a      | USA          |
| AY195784 | L3b1a      | South Africa |
| AY195785 | L2c5       | South Africa |
| AY195788 | L2a2b1a    | South Africa |
| AY195789 | L1c1a1a1b1 | South Africa |
| AY963585 | L0f2a1     | Uganda       |
| DQ282505 | L1b1a7a    | USA          |
| DQ282506 | L1b1a7a    | USA          |
| DQ282507 | L3e1e2     | USA          |
| DQ304897 | L0a1b2     | USA          |
| DQ304898 | L0a1b2     | USA          |
| DQ304899 | L0a1b1a    | USA          |
| DQ304900 | L0a1b1     | USA          |
| DQ304901 | L0a1a2     | USA          |
| DQ304902 | L0a1a2     | USA          |
| DQ304903 | L0a1a2     | USA          |
| DQ304904 | L0a1a2     | USA          |
| DQ304905 | L1b1a3a    | USA          |
| DQ304906 | L1b1a3a1   | USA          |
| DQ304907 | L1b1a3b    | USA          |
| DQ304908 | L1b1a3     | USA          |
| DQ304909 | L1b1a3     | USA          |
| DQ304910 | L1b1a3     | USA          |
| DQ304911 | L1b1a3a1   | USA          |
| DQ304912 | L1b1a3a    | USA          |
| DQ304913 | L1b1a3a    | USA          |
| DQ304914 | L1b1a3a    | USA          |
| DQ304915 | L1b1a3a    | USA          |
| DQ304916 | L1b1a3     | USA          |
| DQ304917 | L1b1a3     | USA          |
| DQ304918 | L1b1a3a1   | USA          |
| DQ304919 | L1b1a      | USA          |
| DQ304920 | L1b1a      | USA          |
| DQ304921 | L1b1a7     | USA          |
| DQ304922 | L1b1a      | USA          |
| DQ304923 | L1b1a7     | USA          |
| DQ304924 | L2a1a      | USA          |
| DQ304963 | L2a1f1     | USA          |
| DQ304964 | L2a1f1     | USA          |
| DQ304965 | L2a1f      | USA          |
| DQ304966 | L2a1f      | USA          |
| DQ304967 | L2a1f1     | USA          |
| DQ304968 | L2a1a2     | USA          |
| DQ304969 | L2a1a2a1a  | USA          |
| DQ304970 | L2a1a2a1a  | USA          |



|          |                |              |
|----------|----------------|--------------|
| DQ304971 | L2a1a2         | USA          |
| DQ304972 | L2a1a2b        | USA          |
| DQ304973 | L2a1a2b        | USA          |
| DQ304974 | L2a1a2a1a      | USA          |
| DQ304975 | L2a1a2a        | USA          |
| DQ304976 | L2a1a2a1a      | USA          |
| DQ304977 | L2a1a2         | USA          |
| DQ304978 | L2b1a3         | USA          |
| DQ304979 | L2b1a3         | USA          |
| DQ304980 | L2b1a3         | USA          |
| DQ304981 | L2b1a          | USA          |
| DQ304982 | L2b1a3         | USA          |
| DQ304983 | L2b1a3         | USA          |
| DQ304984 | L2b1a3         | USA          |
| DQ304985 | L2b1a2         | USA          |
| DQ304986 | L2c2           | USA          |
| DQ304987 | L2c2a1         | USA          |
| DQ304988 | L2c2a          | USA          |
| DQ304989 | L2c2           | USA          |
| DQ304990 | L3b1a3         | USA          |
| DQ304991 | L3b1a11        | USA          |
| DQ304992 | L3b1a11        | USA          |
| DQ304993 | L3b1a5         | USA          |
| DQ304994 | L3b1a1a        | USA          |
| DQ304995 | L3b1a1a        | USA          |
| DQ304996 | L3b1a          | USA          |
| DQ304997 | L3b1a          | USA          |
| DQ304998 | L3e2b+152      | USA          |
| DQ304999 | L3e2b+152      | USA          |
| DQ305000 | L3e2b4         | USA          |
| DQ341060 | L5a1a          | Ethiopia     |
| DQ341061 | L5b1a          | Ethiopia     |
| DQ341062 | L2d1a          | Ethiopia     |
| DQ341063 | L6b            | Ethiopia     |
| DQ341064 | L4a1a          | Ethiopia     |
| DQ341065 | L4b2a1         | Ethiopia     |
| DQ341066 | L3x2a1         | Ethiopia     |
| DQ341067 | L3x1b          | Ethiopia     |
| DQ341068 | L3i2           | Ethiopia     |
| DQ341069 | L3i1b          | Ethiopia     |
| DQ341070 | L3e5e          | Ethiopia     |
| DQ341071 | L3e2b          | Ethiopia     |
| DQ341072 | L3d1b1         | Ethiopia     |
| DQ341073 | L3b1a7a        | Ethiopia     |
| DQ341074 | L3c            | Ethiopia     |
| DQ341075 | L3f3b          | Ethiopia     |
| DQ341076 | L3f2a1a        | Ethiopia     |
| DQ341077 | L3f1b+16292    | Ethiopia     |
| DQ341078 | L3f1a1         | Ethiopia     |
| DQ341079 | L3h1b1         | Ethiopia     |
| DQ341080 | L3h2           | Ethiopia     |
| DQ341081 | L3a1b          | Ethiopia     |
| EF177417 | L2a1c6         | Portugal     |
| EF184582 | L5b1           | Tanzania     |
| EF184585 | L0d3a          | Tanzania     |
| EF184586 | L0d1b2a1       | Tanzania     |
| EF184587 | L0d3a          | Tanzania     |
| EF184588 | L0d3a          | Tanzania     |
| EF184589 | L0d3a          | Tanzania     |
| EF184590 | L0d1b2a1       | South Africa |
| EF184591 | L0d2c1         | South Africa |
| EF184592 | L0d1c1a1a      | South Africa |
| EF184593 | L0d1c3         | South Africa |
| EF184594 | L0d1c1a1b      | South Africa |
| EF184595 | L0f            | Tanzania     |
| EF184596 | L0f2a          | Tanzania     |
| EF184597 | L0f2a1         | Tanzania     |
| EF184598 | L0f            | Tanzania     |
| EF556171 | L3x1a          | Israel       |
| EF556173 | L5a1a          | Israel       |
| EF556174 | L0a2c          | Israel       |
| ESP0167  | L3e4a          | Spain        |
| ESP0191  | L3d1b3a        | Spain        |
| ESP0225  | L2a1c1         | Spain        |
| ESP0297  | L3e5a          | Spain        |
| ESP0313  | L2a1c3a        | Spain        |
| ESP0413  | L4b2b          | Spain        |
| ESP0702  | L1b1a+189      | Spain        |
| ESP0714  | L3b1a+@16124   | Spain        |
| ESP0813  | L1b1a6         | Spain        |
| ESP0922  | L3b1b1         | Spain        |
| ESP0926  | L2c5           | Spain        |
| ESP0928  | L2a1c+16129    | Spain        |
| ESP0954  | L1b1a14        | Spain        |
| ESP0969  | L1b1a6         | Spain        |
| ESP0975  | L3e2b          | Spain        |
| ESP1024  | L3e1f          | Spain        |
| EU092658 | L2a1+143+16189 | Israel       |
| EU092659 | L2a1+143+16189 | Israel       |
| EU092660 | L3c            | Israel       |
| EU092661 | L2b3c          | Israel       |
| EU092662 | L4b2a2a        | Israel       |

|          |                |               |
|----------|----------------|---------------|
| EU092663 | L2a1c3a        | Israel        |
| EU092664 | L2b1a2         | Israel        |
| EU092665 | L0a1a          | Israel        |
| EU092666 | L3x1+16311     | Israel        |
| EU092667 | L1b1a16        | Israel        |
| EU092668 | L0f2a1         | Israel        |
| EU092669 | L3b1a2         | Israel        |
| EU092670 | L0a1d          | Israel        |
| EU092671 | L2a1p          | Israel        |
| EU092672 | L1b1a2         | Israel        |
| EU092673 | L6b            | Israel        |
| EU092674 | L2a1+143+16189 | Israel        |
| EU092675 | L3e1b1         | Israel        |
| EU092676 | L2a1h          | Israel        |
| EU092715 | L1b1a4a        | Guinea-Bissau |
| EU092716 | L1b1a6         | Guinea-Bissau |
| EU092717 | L1c1c          | Guinea-Bissau |
| EU092718 | L1c3a1a        | Guinea-Bissau |
| EU092719 | L2a1i          | Guinea-Bissau |
| EU092720 | L2a1c3b1       | Guinea-Bissau |
| EU092721 | L2a1l2         | Guinea-Bissau |
| EU092722 | L2b1a2         | Guinea-Bissau |
| EU092723 | L2c            | Guinea-Bissau |
| EU092724 | L2e            | Guinea-Bissau |
| EU092725 | L3b2a          | Guinea-Bissau |
| EU092726 | L3b1a          | Guinea-Bissau |
| EU092727 | L3b1a9a        | Guinea-Bissau |
| EU092728 | L3d1b1         | Guinea-Bissau |
| EU092729 | L3e2a3         | Guinea-Bissau |
| EU092730 | L3e2b          | Guinea-Bissau |
| EU092731 | L3e4a1         | Guinea-Bissau |
| EU092732 | L3f1b+16292    | Guinea-Bissau |
| EU092733 | L2a1c          | Guinea-Bissau |
| EU092734 | L2b3b          | Guinea-Bissau |
| EU092735 | L3d2b          | Guinea-Bissau |
| EU092736 | L3h1b2         | Guinea-Bissau |
| EU092737 | L1b1a9         | Syria         |
| EU092738 | L1c2b2         | Syria         |
| EU092739 | L2a1o          | Syria         |
| EU092740 | L3e1c          | Syria         |
| EU092741 | L3f1b+16292    | Syria         |
| EU092742 | L3d4a          | Syria         |
| EU092743 | L4b2a2a        | Syria         |
| EU092744 | L3b1a2         | Syria         |
| EU092745 | L0a2a2a        | Saudi Arabia  |
| EU092746 | L0a1b2a        | Saudi Arabia  |
| EU092747 | L2b1           | Saudi Arabia  |
| EU092748 | L4a1a          | Saudi Arabia  |
| EU092749 | L3e1a1a        | Saudi Arabia  |
| EU092750 | L4b2a2         | Saudi Arabia  |
| EU092751 | L3f1b+16292    | Lebanon       |
| EU092752 | L3e4           | Lebanon       |
| EU092791 | L3f1b4a1       | Oman          |
| EU092792 | L0k2b          | Yemen         |
| EU092793 | L2a1+143+16189 | Yemen         |
| EU092794 | L2d1a          | Yemen         |
| EU092795 | L3b1a2         | Yemen         |
| EU092796 | L3d1a          | Yemen         |
| EU092797 | L3d1a1a        | Yemen         |
| EU092798 | L3h1a2a1       | Yemen         |
| EU092799 | L4a2           | Yemen         |
| EU092800 | L4a2           | Yemen         |
| EU092801 | L0a1d          | Yemen         |
| EU092802 | L6a            | Yemen         |
| EU092803 | L6a            | Yemen         |
| EU092804 | L2a1a2         | Yemen         |
| EU092805 | L3f1b2         | Yemen         |
| EU092806 | L2a1+16189     | Morocco       |
| EU092807 | L2a1l1a        | Morocco       |
| EU092808 | L4b1a          | Yemen         |
| EU092809 | L0a1d          | Yemen         |
| EU092810 | L0a1d          | Yemen         |
| EU092811 | L1c3b1a        | Morocco       |
| EU092812 | L2a1l1a1       | Morocco       |
| EU092813 | L2c1a          | Morocco       |
| EU092814 | L3b1b          | Morocco       |
| EU092815 | L3b1a+152      | Morocco       |
| EU092816 | L2a1j          | Morocco       |
| EU092817 | L2d+16129      | Algeria       |
| EU092818 | L3x2b          | Algeria       |
| EU092819 | L0a1a2         | Algeria       |
| EU092820 | L3b1a          | Libya         |
| EU092821 | L3e5a1         | Libya         |
| EU092822 | L3k            | Libya         |
| EU092823 | L2a1+143+16189 | Libya         |
| EU092824 | L3k1           | Tunisia       |
| EU092825 | L3b1a9a        | Tunisia       |
| EU092826 | L3b1a3         | Tunisia       |
| EU092827 | L3e1           | Tunisia       |
| EU092828 | L3h1b1         | Tunisia       |
| EU092867 | L3e1a2         | South Africa  |
| EU092868 | L0a2a1a2       | South Africa  |

|          |                 |              |
|----------|-----------------|--------------|
| EU092869 | L0a1b1a1        | South Africa |
| EU092870 | L0f1            | South Africa |
| EU092871 | L0a1b1a1        | South Africa |
| EU092872 | L2a1a2a1a       | South Africa |
| EU092873 | L1c2a1a         | South Africa |
| EU092874 | L0f1            | South Africa |
| EU092875 | L3e1a2          | South Africa |
| EU092876 | L3d1a1b         | South Africa |
| EU092877 | L3f2b           | South Africa |
| EU092878 | L0a1b           | Chad         |
| EU092879 | L3e1c           | Chad         |
| EU092880 | L3e1c           | Chad         |
| EU092881 | L0a1a+200       | Chad         |
| EU092882 | L2a2a1          | Chad         |
| EU092883 | L3f1b3          | Chad         |
| EU092884 | L1b1a10a        | Chad         |
| EU092885 | L3e1c           | Chad         |
| EU092886 | L3h1b1a         | Chad         |
| EU092887 | L3e1            | Chad         |
| EU092888 | L5a1b           | Chad         |
| EU092889 | L0a1b           | Chad         |
| EU092890 | L2a1a3a         | Chad         |
| EU092891 | L3f1a           | Chad         |
| EU092892 | L0a1a+200       | Chad         |
| EU092893 | L1b1a10a        | Chad         |
| EU092894 | L3f3a           | Chad         |
| EU092895 | L3e3b           | Chad         |
| EU092896 | L2a2a           | Chad         |
| EU092897 | L3b1a10         | Chad         |
| EU092898 | L3d1'2'3'4'5'6  | Chad         |
| EU092899 | L3d1b           | Chad         |
| EU092900 | L0a3            | Chad         |
| EU092901 | L2a1c           | Chad         |
| EU092902 | L2a2a1          | Chad         |
| EU092903 | L3h1b1a         | Chad         |
| EU092904 | L3b1a           | Chad         |
| EU092943 | L5a1b           | Ethiopia     |
| EU092944 | L3x2a           | Ethiopia     |
| EU092945 | L0a1c1          | Ethiopia     |
| EU092946 | L2a1+143        | Ethiopia     |
| EU092947 | L3h1b1a         | Ethiopia     |
| EU092948 | L1b1a2a         | Ethiopia     |
| EU092949 | L4a2            | Ethiopia     |
| EU092950 | L0a1d           | Ethiopia     |
| EU092951 | L4b2a2b         | Ethiopia     |
| EU092952 | L1b1a2a         | Ethiopia     |
| EU092953 | L3f1b2a         | Ethiopia     |
| EU092954 | L2a1c1a2        | Ethiopia     |
| EU092955 | L2c2a           | Unknown      |
| EU092956 | L1c3a1b         | Unknown      |
| EU092957 | L2c2a           | Unknown      |
| EU092958 | L3b1a6          | Unknown      |
| EU092959 | L3e5b           | Unknown      |
| EU092960 | L3e1a3b         | Gambia       |
| EU092961 | L2a1f1          | Unknown      |
| EU092962 | L3b1a5          | Unknown      |
| EU092963 | L0a1b2          | Unknown      |
| EU092964 | L0f2a           | Unknown      |
| EU092965 | L0d1b2b1a       | Unknown      |
| EU092966 | L0k1a1a         | Unknown      |
| EU200759 | L3d1b1b         | Poland       |
| EU200760 | L2a1k           | Czech Rep    |
| EU200761 | L3b1b1          | Russia       |
| EU200762 | L2a1c3a         | Slovenia     |
| EU200763 | L2a1k           | Slovenia     |
| EU200764 | L1b1a12b        | Russia       |
| EU273476 | L1c1a2b         | Cameroon     |
| EU273477 | L1c1a1a1a       | Cameroon     |
| EU273478 | L1c1a1a1b1      | Cameroon     |
| EU273479 | L1c1a2a1        | Gabon        |
| EU273480 | L1c1a1a1b       | Gabon        |
| EU273481 | L1c1a1a1b       | Gabon        |
| EU273482 | L1c1a1a1b1      | Gabon        |
| EU273483 | L1c1a1a1a       | Gabon        |
| EU935437 | L0a1b1a         | Egypt        |
| EU935440 | L3b2a           | Egypt        |
| EU935443 | L2a1c5          | Egypt        |
| EU935449 | L3b1a2          | Egypt        |
| EU935451 | L3f1b2a         | Egypt        |
| EU935458 | L1c3a1a         | Egypt        |
| EU935462 | L1c3a1a         | Egypt        |
| EU935464 | L0a1b1a         | Egypt        |
| EU935465 | L3e2b7          | Egypt        |
| EU935467 | L0a1b1a         | Egypt        |
| FJ157838 | L0a2a2          | India        |
| FJ157839 | L0a2a2          | India        |
| FJ157840 | L0a2a2          | India        |
| FJ228403 | L2b1b           | Senegal      |
| FJ460520 | L2a1+143+@16309 | Tunisia      |
| FJ460522 | L1b1a13         | Tunisia      |
| FJ460523 | L2e1a           | Tunisia      |
| FJ460526 | L2b3c           | Tunisia      |

|          |                 |          |
|----------|-----------------|----------|
| FJ460527 | L2a1+143+16189  | Tunisia  |
| FJ460529 | L3b1a3          | Tunisia  |
| FJ460531 | L4a1            | Tunisia  |
| FJ460533 | L3e5d           | Tunisia  |
| FJ460535 | L2b1a3          | Tunisia  |
| FJ460536 | L3b1a4          | Tunisia  |
| FJ460537 | L1b1a12a        | Tunisia  |
| FJ460540 | L3d4a           | Tunisia  |
| FJ460549 | L2a1c4a         | Tunisia  |
| FJ460560 | L2a1c1          | Tunisia  |
| FJ625845 | L3f1a1          | Chad     |
| FJ625846 | L3f3            | Chad     |
| FJ625847 | L3f3            | Chad     |
| FJ625848 | L3f3            | Chad     |
| FJ625849 | L3f3            | Chad     |
| FJ625850 | L3f3b           | Chad     |
| FJ625851 | L3f3            | Chad     |
| FJ625852 | L3f3b           | Chad     |
| FJ625853 | L3f3            | Chad     |
| FJ625854 | L3f3a           | Chad     |
| HG01456  | L3e2a1b3        | Colombia |
| HG01551  | L3e4a           | Colombia |
| HG01607  | L1b1a6          | Spain    |
| HG01761  | L3d1b1          | Spain    |
| HG02006  | L3e3b1          | Peru     |
| HG02304  | L3f1b+16292+150 | Peru     |
| HG02439  | L2a1a2b         | Barbados |
| HG02455  | L2a1c5          | Barbados |
| HG02461  | L3b1a           | Gambia   |
| HG02462  | L2c5            | Gambia   |
| HG02464  | L3e4a           | Gambia   |
| HG02465  | L3b2a           | Gambia   |
| HG02476  | L2a1f1          | Barbados |
| HG02477  | L1b1a9          | Barbados |
| HG02481  | L2a1f2          | Barbados |
| HG02501  | L2a1a           | Barbados |
| HG02502  | L2a1c           | Barbados |
| HG02505  | L2c1            | Barbados |
| HG02536  | L2d+16129       | Barbados |
| HG02541  | L3f1b4a         | Barbados |
| HG02545  | L2d1            | Barbados |
| HG02546  | L2a1c5          | Barbados |
| HG02549  | L2a1c5          | Barbados |
| HG02554  | L2a1i1          | Barbados |
| HG02555  | L2b             | Barbados |
| HG02557  | L2a1f1          | Barbados |
| HG02558  | L3d1'2'3'4'5'6  | Barbados |
| HG02561  | L1b2            | Gambia   |
| HG02562  | L1b1a7a         | Gambia   |
| HG02568  | L2a1l           | Gambia   |
| HG02570  | L4b1a           | Gambia   |
| HG02571  | L1b1a14         | Gambia   |
| HG02573  | L3e2a3          | Gambia   |
| HG02574  | L3d2a           | Gambia   |
| HG02577  | L2a1b1          | Barbados |
| HG02580  | L1b1a15         | Barbados |
| HG02582  | L3k1            | Gambia   |
| HG02583  | L3d1a1b         | Gambia   |
| HG02769  | L3e4a1          | Gambia   |
| HG02771  | L3d1'2'3'4'5'6  | Gambia   |
| HG02772  | L1b1a7          | Gambia   |
| HG02798  | L3d1a1b         | Gambia   |
| HG02799  | L2d+16129       | Gambia   |
| HG02804  | L2b             | Gambia   |
| HG02805  | L3h1b2          | Gambia   |
| HG02807  | L3e2b           | Gambia   |
| HG02808  | L2a1c           | Gambia   |
| HG02810  | L3b1a5          | Gambia   |
| HG02811  | L1b1a4          | Gambia   |
| HG02813  | L3b2a           | Gambia   |
| HG02814  | L2c             | Gambia   |
| HG02817  | L3e3b           | Gambia   |
| HG02819  | L2a1c2          | Gambia   |
| HG02820  | L1b2a           | Gambia   |
| HG02836  | L2c2            | Gambia   |
| HG02837  | L2b             | Gambia   |
| HG02839  | L3e2a           | Gambia   |
| HG02840  | L1b1a4          | Gambia   |
| HG02851  | L2a1c3b         | Gambia   |
| HG02852  | L2a1a           | Gambia   |
| HG02854  | L3b1a+@16124    | Gambia   |
| HG02855  | L1b1a4          | Gambia   |
| HG02860  | L2a1a           | Gambia   |
| HG02861  | L2a1c3a1        | Gambia   |
| HG02870  | L2a1a3          | Gambia   |
| HG02878  | L2c4            | Gambia   |
| HG02879  | L2c             | Gambia   |
| HG02881  | L2d+16129       | Gambia   |
| HG02882  | L2c             | Gambia   |
| HG02885  | L2a1f           | Gambia   |
| HG02887  | L2b1a2          | Gambia   |
| HG02888  | L2c             | Gambia   |

|          |           |              |
|----------|-----------|--------------|
| HG02890  | L3e2a3    | Gambia       |
| HG02891  | L1b1a4    | Gambia       |
| HG02895  | L2a1c3a1  | Gambia       |
| HG02896  | L2c5      | Gambia       |
| HG03066  | L1b2a     | Sierra Leone |
| HG03069  | L2c2      | Sierra Leone |
| HG03072  | L2c       | Sierra Leone |
| HG03073  | L1b1a9    | Sierra Leone |
| HG03074  | L2c3      | Sierra Leone |
| HG03077  | L1c1d     | Sierra Leone |
| HG03078  | L2a1c     | Sierra Leone |
| HG03079  | L1b1a18   | Sierra Leone |
| HG03081  | L3e4a     | Sierra Leone |
| HG03082  | L3e3b     | Sierra Leone |
| HG03084  | L0a1a3    | Sierra Leone |
| HG03085  | L2a1l     | Sierra Leone |
| HG03086  | L3b3      | Sierra Leone |
| HG03088  | L2a1c3b1  | Sierra Leone |
| HG03091  | L2c       | Sierra Leone |
| HG03095  | L3b1a5    | Sierra Leone |
| HG03096  | L1c1c     | Sierra Leone |
| HG03097  | L2a1l     | Sierra Leone |
| HG03099  | L1b1a+189 | Nigeria      |
| HG03100  | L3d1d     | Nigeria      |
| HG03103  | L1b1a15   | Nigeria      |
| HG03105  | L3e3b     | Nigeria      |
| HG03108  | L3b1a     | Nigeria      |
| HG03109  | L1b1a3    | Nigeria      |
| HG03111  | L3f1b3    | Nigeria      |
| HG03112  | L1b1a3    | Nigeria      |
| HG03114  | L2a1a2c   | Nigeria      |
| HG03115  | L3e2b1a2  | Nigeria      |
| HG03117  | L2a1c1a2  | Nigeria      |
| HG03118  | L3e1a     | Nigeria      |
| HG03120  | L1b1a3    | Nigeria      |
| HG03123  | L2a1a2    | Nigeria      |
| HG03124  | L3b1a     | Nigeria      |
| HG03126  | L3e1a3b   | Nigeria      |
| HG03127  | L0a1a2    | Nigeria      |
| HG03129  | L3d2a     | Nigeria      |
| HG03130  | L2e1a     | Nigeria      |
| HG03132  | L2a1b1    | Nigeria      |
| HG03291  | L2b1a     | Nigeria      |
| HG03294  | L3b1b     | Nigeria      |
| HG03295  | L1b1a     | Nigeria      |
| HG03297  | L2a1f1    | Nigeria      |
| HG03298  | L0a1a2    | Nigeria      |
| HG03300  | L1c2b1a'b | Nigeria      |
| HG03301  | L3e2a1b1  | Nigeria      |
| HG03303  | L3f1b4c   | Nigeria      |
| HG03304  | L3e2b8    | Nigeria      |
| HG03311  | L1b1a     | Nigeria      |
| HG03313  | L1c2a2    | Nigeria      |
| HG03343  | L1c3a     | Nigeria      |
| HG03351  | L1b1a     | Nigeria      |
| HG03352  | L3e2b1a1  | Nigeria      |
| HG03354  | L2c2b1a   | Nigeria      |
| HG03363  | L1c2b1b   | Nigeria      |
| HG03366  | L3d1b2    | Nigeria      |
| HG03367  | L2e1a     | Nigeria      |
| HG03369  | L3e3b     | Nigeria      |
| HG03370  | L3b1a     | Nigeria      |
| HG03372  | L3e3b     | Nigeria      |
| HG03376  | L2c       | Sierra Leone |
| HG03378  | L3e3b     | Sierra Leone |
| HG03380  | L1c1c     | Sierra Leone |
| HG03382  | L2a1l1b   | Sierra Leone |
| HG03385  | L1c1c     | Sierra Leone |
| HG03388  | L2c2      | Sierra Leone |
| HG03391  | L1c1c     | Sierra Leone |
| HG03394  | L3b1a6    | Sierra Leone |
| HG03397  | L1c1d     | Sierra Leone |
| HG03401  | L2a1l     | Sierra Leone |
| HG03410  | L2a1a1    | Sierra Leone |
| HG03419  | L3e2b+152 | Sierra Leone |
| HG03428  | L2a1l1b   | Sierra Leone |
| HG03432  | L2a1i     | Sierra Leone |
| HG03433  | L2c       | Sierra Leone |
| HG03436  | L1b1a14   | Sierra Leone |
| HG03437  | L2d1      | Sierra Leone |
| HG03572  | L3e2b     | Sierra Leone |
| HG03575  | L2a1f1    | Sierra Leone |
| HG03577  | L3e2a     | Sierra Leone |
| HG03578  | L2a1a1    | Sierra Leone |
| HG03583  | L3h1b1a   | Sierra Leone |
| HM596745 | L2a5      | Bermuda      |
| HM771113 | L1c1a2c   | Congo        |
| HM771114 | L1c1a2c   | Congo        |
| HM771115 | L1c1a2c   | Congo        |
| HM771116 | L1c4b     | Congo        |
| HM771117 | L1c4a     | Congo        |
| HM771118 | L1c4b     | Congo        |

|          |            |                          |
|----------|------------|--------------------------|
| HM771119 | L1c4b      | Congo                    |
| HM771120 | L1c4b      | Congo                    |
| HM771121 | L1c4b      | Congo                    |
| HM771122 | L3e2b      | Gabon                    |
| HM771123 | L1c1a2b    | Cameroon                 |
| HM771124 | L1c1a2b    | Cameroon                 |
| HM771125 | L1c1b1     | Cameroon                 |
| HM771126 | L1c4a      | Cameroon                 |
| HM771127 | L1c1a1a1a  | Cameroon                 |
| HM771128 | L1c1a1a1b  | Congo                    |
| HM771129 | L1c1a1a1b  | Congo                    |
| HM771130 | L1c1a1a1b1 | Congo                    |
| HM771131 | L1c1a1a1b1 | Cameroon                 |
| HM771132 | L1c1a1a1a  | Cameroon                 |
| HM771133 | L1c1a1a1a  | Congo                    |
| HM771134 | L1c1a1a1a  | Cameroon                 |
| HM771135 | L3e1f1     | Cameroon                 |
| HM771136 | L1c1a2a1   | Gabon                    |
| HM771137 | L1c1a2b    | Gabon                    |
| HM771138 | L1c1a2b    | Congo                    |
| HM771139 | L1c1a1a1b1 | Congo                    |
| HM771140 | L1c1a1a1b  | Congo                    |
| HM771141 | L1c1a1a1a  | Gabon                    |
| HM771142 | L1c1a2b    | Cameroon                 |
| HM771143 | L1c1a2b    | Cameroon                 |
| HM771144 | L1c1a1a1b1 | Cameroon                 |
| HM771183 | L1c1a1a1b  | Central African Republic |
| HM771184 | L1c1a1a1b  | Central African Republic |
| HM771185 | L1c1a1a1b  | Central African Republic |
| HM771186 | L1c1a1a1b1 | Central African Republic |
| HM771187 | L1c1a1a1b1 | Central African Republic |
| HM771188 | L0a2b1     | Central African Republic |
| HM771189 | L0a2b      | Central African Republic |
| HM771190 | L0a2b      | Central African Republic |
| HM771191 | L2a2b2     | Congo                    |
| HM771192 | L2a2b1a    | Congo                    |
| HM771193 | L2a2b1a    | Congo                    |
| HM771194 | L2a2b1a    | Congo                    |
| HM771195 | L2a2b1a    | Congo                    |
| HM771196 | L2a4a      | Congo                    |
| HM771197 | L2a4a      | Congo                    |
| HM771198 | L5a1c      | Unknown                  |

|          |           |                          |
|----------|-----------|--------------------------|
| HM771199 | L0a2b     | Central African Republic |
| HM771200 | L0a2b1    | Central African Republic |
| HM771201 | L0a2b1    | Central African Republic |
| HM771202 | L0a2b     | Central African Republic |
| HM771203 | L5a1c     | Unknown                  |
| HM771204 | L5a1c     | Unknown                  |
| HM771205 | L2a2a1    | Congo                    |
| HM771206 | L2a3      | Congo                    |
| HM771207 | L2a2b2    | Congo                    |
| HM771208 | L2a2b1a   | Congo                    |
| HM771209 | L2a4a     | Congo                    |
| HM771210 | L2a4a     | Congo                    |
| HM771211 | L2a4a     | Congo                    |
| HM771212 | L2a4a     | Congo                    |
| HM771213 | L2a4a     | Congo                    |
| HM771214 | L2a4a     | Congo                    |
| HM771215 | L2a4a     | Congo                    |
| HM771216 | L1c1a2b   | Gabon                    |
| HM771217 | L1c1a2a1  | Gabon                    |
| HM771218 | L1c1a2a1  | Gabon                    |
| HM771219 | L1c3a1b   | Gabon                    |
| HM771220 | L1c1b1    | Gabon                    |
| JN214448 | L3e1f2    | Italy                    |
| JN214449 | L2a1a2    | Italy                    |
| JN214450 | L3d1b1a   | Italy                    |
| JN214451 | L3b3      | Italy                    |
| JN214452 | L3e5a     | Hungary                  |
| JN214453 | L2b1a4    | Italy                    |
| JN214454 | L2b1a4    | Italy                    |
| JN214457 | L2a1a2    | Italy                    |
| JN214458 | L3h1b1a   | Spain                    |
| JN214459 | L3d1b1a   | Italy                    |
| JN214460 | L1b1a16   | Italy                    |
| JN214461 | L1b1a6    | Portugal                 |
| JN214462 | L1b1a3    | Portugal                 |
| JN214463 | L1b1a12a  | Portugal                 |
| JN214464 | L1b1a     | England                  |
| JN214465 | L1b1a+189 | Ireland                  |
| JN214466 | L1b1a     | Portugal                 |
| JN214467 | L1b1a6    | Wales                    |
| JN214468 | L1b1a14   | France                   |
| JN214469 | L1b1a+189 | Slovenia                 |
| JN214470 | L1b2a     | Germany                  |
| JN214471 | L1b1a+189 | Switzerland              |

|          |                 |              |
|----------|-----------------|--------------|
| JN214472 | L1b1a6          | Portugal     |
| JN214473 | L1b1a14         | Italy        |
| JN214474 | L1b1a2a         | Spain        |
| JN214475 | L3e2b           | Italy        |
| JN214476 | L1b1a16         | France       |
| JN214477 | L1b1a13         | Italy        |
| JN214478 | L3d1b1a         | Italy        |
| JN214479 | L3d             | Italy        |
| JN214480 | L1b1a           | Italy        |
| JN225464 | L3e2b           | Italy        |
| JN225465 | L1b1a16         | Italy        |
| JN225466 | L1b1a16         | Italy        |
| JN225467 | L3d1b1a         | Italy        |
| JN225468 | L3d1b1a         | Italy        |
| JN381504 | L3e2b4          | USA          |
| JN415484 | L2a1o           | France       |
| JN655811 | L3e1d1          | Somalia      |
| JN655812 | L3e3a           | Somalia      |
| JN655813 | L3a1a           | Somalia      |
| JN655814 | L3i2            | Somalia      |
| JN655815 | L3h2            | Somalia      |
| JN655816 | L3i2            | Somalia      |
| JN655817 | L3f1a1          | Somalia      |
| JN655818 | L3x1b           | Somalia      |
| JN655819 | L3f2a1a         | Somalia      |
| JN655820 | L3h2            | Yemen        |
| JN655821 | L3h2            | Yemen        |
| JN655822 | L3e5            | Sudan        |
| JN655823 | L3d1b1b         | Sudan        |
| JN655824 | L3h1a2a1        | Sudan        |
| JN655825 | L3h2            | Sudan        |
| JN655826 | L3b1a+@16124    | Sudan        |
| JN655827 | L3b1a2          | Sudan        |
| JN655828 | L3e5+195        | Sudan        |
| JN655829 | L3x2a1a         | Sudan        |
| JN655830 | L3h1a1          | Sudan        |
| JN655831 | L3f3            | Sudan        |
| JN655832 | L3f2a1          | Sudan        |
| JN655833 | L3f1b+16292     | Sudan        |
| JN655834 | L3d4a           | Sudan        |
| JN655835 | L3f1b+16292     | Sudan        |
| JN655836 | L3f1b+16292     | Sudan        |
| JN655837 | L3x1+16311      | Sudan        |
| JN655838 | L3h1b1a         | Sudan        |
| JN655839 | L3h1b1a         | Sudan        |
| JN655840 | L3h1a2a         | Sudan        |
| JN655841 | L3f2a1          | Sudan        |
| JN655842 | L3f1a1          | Sudan        |
| JN858955 | L2a1c+16129     | Cameroon     |
| JN858956 | L2a1d2          | Benin        |
| JN989561 | L2a1f1          | unknown      |
| JQ044792 | L1b1a4a         | Burkina Faso |
| JQ044793 | L1b1a10         | Burkina Faso |
| JQ044794 | L3e2b1a1        | Burkina Faso |
| JQ044835 | L3e3b           | Burkina Faso |
| JQ044836 | L1c6            | Burkina Faso |
| JQ044837 | L2a1b3          | Burkina Faso |
| JQ044838 | L0a1a2          | Burkina Faso |
| JQ044839 | L2a1+143+@16309 | Burkina Faso |
| JQ044840 | L3e3'4'5        | Burkina Faso |
| JQ044841 | L2a1b2          | Burkina Faso |
| JQ044842 | L3d1c1          | Burkina Faso |
| JQ044843 | L3b2a           | Burkina Faso |
| JQ044844 | L2a1c2          | Burkina Faso |
| JQ044845 | L2a1a           | Burkina Faso |
| JQ044846 | L2b2a           | Burkina Faso |
| JQ044847 | L3e1g           | Burkina Faso |
| JQ044848 | L4b1a           | Burkina Faso |
| JQ044849 | L0a1a2          | Burkina Faso |
| JQ044850 | L3e3b3          | Burkina Faso |
| JQ044851 | L0a1a+200       | Burkina Faso |
| JQ044852 | L3d1c1          | Burkina Faso |
| JQ044853 | L2c2b2          | Burkina Faso |
| JQ044854 | L2b1a           | Burkina Faso |
| JQ044855 | L1c3a1b         | Burkina Faso |
| JQ044856 | L3e2b           | Burkina Faso |
| JQ044857 | L1b1a           | Burkina Faso |
| JQ044858 | L2c1            | Burkina Faso |
| JQ044859 | L2a1f           | Burkina Faso |
| JQ044860 | L2a1c1          | Burkina Faso |
| JQ044861 | L2a1f3          | Burkina Faso |
| JQ044862 | L3d1c           | Burkina Faso |
| JQ044863 | L1b1a4          | Burkina Faso |
| JQ044864 | L3d5a           | Burkina Faso |
| JQ044865 | L3e2b           | Burkina Faso |
| JQ044866 | L1b2            | Burkina Faso |
| JQ044867 | L1b1a10         | Burkina Faso |
| JQ044868 | L1b1a+189       | Burkina Faso |
| JQ044869 | L3b2b           | Burkina Faso |
| JQ044870 | L3e3b3          | Burkina Faso |
| JQ044871 | L3e2a           | Burkina Faso |
| JQ044872 | L2a1c2a         | Burkina Faso |



|          |           |              |          |           |              |
|----------|-----------|--------------|----------|-----------|--------------|
| JQ044913 | L3e2b     | Burkina Faso | JQ045001 | L2a1a1    | Burkina Faso |
| JQ044914 | L2c4      | Burkina Faso | JQ045002 | L2c1      | Burkina Faso |
| JQ044915 | L3d1c1    | Burkina Faso | JQ045004 | L0a1a2    | Burkina Faso |
| JQ044916 | L2a1m     | Burkina Faso | JQ045005 | L2a1a     | Burkina Faso |
| JQ044917 | L2c3      | Burkina Faso | JQ045006 | L2a1f     | Burkina Faso |
| JQ044918 | L2a1a3b   | Burkina Faso | JQ045008 | L2b       | Burkina Faso |
| JQ044919 | L2a1l1    | Burkina Faso | JQ045009 | L3b1a     | Burkina Faso |
| JQ044920 | L2c2      | Burkina Faso | JQ045010 | L2c2      | Burkina Faso |
| JQ044921 | L2c4      | Burkina Faso | JQ045011 | L2d1a     | Burkina Faso |
| JQ044922 | L2a1a     | Burkina Faso | JQ045012 | L2b3a     | Burkina Faso |
| JQ044924 | L2a1c2    | Burkina Faso | JQ045013 | L2b1a2    | Burkina Faso |
| JQ044925 | L3e3b     | Burkina Faso | JQ045014 | L2a1c4a   | Burkina Faso |
| JQ044926 | L1b1a     | Burkina Faso | JQ045015 | L2a1a3    | Burkina Faso |
| JQ044927 | L2a1a     | Burkina Faso | JQ045016 | L3e2b     | Burkina Faso |
| JQ044928 | L3e2      | Burkina Faso | JQ045017 | L2a1a2a1a | Burkina Faso |
| JQ044929 | L2d1a     | Burkina Faso | JQ045018 | L3b1a9    | Burkina Faso |
| JQ044930 | L2a1a     | Burkina Faso | JQ045019 | L2a1c     | Burkina Faso |
| JQ044931 | L3e2b1    | Burkina Faso | JQ045020 | L2a1a1    | Burkina Faso |
| JQ044932 | L2a1l1a   | Burkina Faso | JQ045021 | L2a1a     | Burkina Faso |
| JQ044933 | L3e2b     | Burkina Faso | JQ045022 | L2c1a     | Burkina Faso |
| JQ044935 | L2a1c2    | Burkina Faso | JQ045023 | L3b1a9    | Burkina Faso |
| JQ044936 | L1b3      | Burkina Faso | JQ045024 | L2a1c2    | Burkina Faso |
| JQ044937 | L2a1c4a1  | Burkina Faso | JQ045025 | L2a1c2a   | Burkina Faso |
| JQ044938 | L3e2      | Burkina Faso | JQ045026 | L3d4      | Burkina Faso |
| JQ044939 | L3d1b2    | Burkina Faso | JQ045027 | L2a1a2    | Burkina Faso |
| JQ044941 | L2c       | Burkina Faso | JQ045028 | L3b1a6    | Burkina Faso |
| JQ044942 | L2a1a     | Burkina Faso | JQ045029 | L3b2      | Burkina Faso |
| JQ044943 | L0a1a3    | Burkina Faso | JQ045030 | L2c       | Burkina Faso |
| JQ044944 | L2a1n     | Burkina Faso | JQ045031 | L3e1      | Burkina Faso |
| JQ044945 | L2a1a2    | Burkina Faso | JQ045032 | L1b1a3a1  | Burkina Faso |
| JQ044947 | L3e3b     | Burkina Faso | JQ045071 | L1b2      | Burkina Faso |
| JQ044948 | L2d1      | Burkina Faso | JQ045072 | L3b1a9a   | Burkina Faso |
| JQ044949 | L1b1a9    | Burkina Faso | JQ045073 | L1c3a1a   | Burkina Faso |
| JQ044950 | L1b1a+189 | Burkina Faso | JQ045074 | L2a1a1    | Burkina Faso |
| JQ044951 | L2a1a2    | Burkina Faso | JQ045075 | L3d1b     | Burkina Faso |
| JQ044952 | L2a1a2    | Burkina Faso | JQ045076 | L2a1a2    | Burkina Faso |
| JQ044953 | L1b1a9    | Burkina Faso | JQ045077 | L2a1i     | Burkina Faso |
| JQ044954 | L1b2      | Burkina Faso | JQ045078 | L3b1a+152 | Burkina Faso |
| JQ044993 | L3b1a+152 | Burkina Faso | JQ045079 | L1b1a3a   | Burkina Faso |
| JQ044994 | L2a1l2    | Burkina Faso | JQ045080 | L2a1i     | Burkina Faso |
| JQ044995 | L0a1a2    | Burkina Faso | JQ045081 | L4b1a     | Burkina Faso |
| JQ044996 | L2a1c3b   | Burkina Faso | JQ045082 | L2a1c5    | Burkina Faso |
| JQ044997 | L2a1a2    | Burkina Faso | JQ045083 | L1b1a3    | Burkina Faso |
| JQ044998 | L2a1c2    | Burkina Faso | JQ045084 | L3f1b4c   | Burkina Faso |
| JQ044999 | L3e3b     | Burkina Faso | JQ045085 | L3f1b1a   | Burkina Faso |
| JQ045000 | L2a1o     | Burkina Faso | JQ045086 | L1b1a     | Burkina Faso |

|          |                |              |
|----------|----------------|--------------|
| JQ045087 | L2a1f          | Burkina Faso |
| JQ045088 | L2a1a2b        | Burkina Faso |
| JQ045089 | L3e1           | Burkina Faso |
| JQ045090 | L2a1f          | Burkina Faso |
| JQ045091 | L3d6           | Burkina Faso |
| JQ045092 | L3e2a2         | Burkina Faso |
| JQ045093 | L3f1b4b        | Burkina Faso |
| JQ045094 | L1b1a18        | Burkina Faso |
| JQ045095 | L2a1a2b        | Burkina Faso |
| JQ045096 | L3e1e          | Burkina Faso |
| JQ045097 | L2a1f2         | Burkina Faso |
| JQ045098 | L2a1c5         | Burkina Faso |
| JQ045099 | L1c3a1b        | Burkina Faso |
| JQ045100 | L1b1a10        | Burkina Faso |
| JQ045101 | L2a1a3c        | Burkina Faso |
| JQ045102 | L2a1i1         | Burkina Faso |
| JQ045103 | L3e3b1         | Burkina Faso |
| JQ045104 | L2c3a          | Burkina Faso |
| JQ045105 | L2c1a          | Burkina Faso |
| JQ045106 | L2c1a          | Burkina Faso |
| JQ045107 | L1b1a4         | Burkina Faso |
| JQ045108 | L2a1c2         | Burkina Faso |
| JQ702428 | L0a1a+200      | Unknown      |
| JQ702430 | L2a1+143+16189 | USA          |
| JQ702441 | L1c3b1a        | Unknown      |
| JQ702481 | L3d1a2         | Unknown      |
| JQ702503 | L2a1c+16086    | Mexico       |
| JQ702504 | L4b2b1         | Unknown      |
| JQ702533 | L3e2a1b        | Unknown      |
| JQ702600 | L1c3b1b        | Unknown      |
| JQ702617 | L1c5           | Unknown      |
| JQ702626 | L2b3a          | unknown      |
| JQ702659 | L2a1c6         | France       |
| JQ702694 | L2b1a3         | unknown      |
| JQ702903 | L1c2b1c        | Unknown      |
| JQ702904 | L2a1l2a1       | unknown      |
| JQ702968 | L2a1c+16129    | unknown      |
| JQ703036 | L1b1a3b        | Unknown      |
| JQ703065 | L2a1n          | unknown      |
| JQ703138 | L3e2b1a        | Unknown      |
| JQ703481 | L0a1a2         | Unknown      |
| JQ703618 | L1b1a7a        | Unknown      |
| JQ703621 | L3f1b          | Spain        |
| JQ703625 | L3e3b          | Unknown      |
| JQ703773 | L1c4b          | Unknown      |
| JQ703960 | L2a1f          | unknown      |
| JQ703986 | L3b3           | Unknown      |
| JQ704094 | L2c2b1a        | unknown      |
| JQ704266 | L1b1a15a       | Unknown      |
| JQ704668 | L2a1f          | unknown      |
| JQ704670 | L3f1b1a        | Ethiopia     |
| JQ704683 | L1b1a17        | Unknown      |
| JQ704728 | L3e1f          | Unknown      |
| JQ704740 | L2c2a1         | unknown      |
| JQ704825 | L1b1a7a        | Spain        |
| JQ704917 | L3e2b1a1       | Ghana        |
| JQ704919 | L3b3           | Unknown      |
| JQ704931 | L3e3b1         | Unknown      |
| JQ704968 | L1b1a8         | Unknown      |
| JQ704978 | L2c            | unknown      |
| JQ705732 | L1b1a3         | Unknown      |
| JQ705753 | L3b1a          | Unknown      |
| JQ705783 | L3b1a1         | Unknown      |
| JQ705832 | L1b1a10        | Unknown      |
| JQ705851 | L3e3b2         | Unknown      |
| JQ705864 | L1c2b1a1       | Unknown      |
| JQ705902 | L3e1a3a        | USA          |
| JQ705912 | L3d1d          | South Africa |
| JQ705931 | L1b1a12b       | Unknown      |
| JQ706014 | L2a1a1         | unknown      |
| JX021728 | L2a1l3         | Algeria      |
| JX153016 | L1b1a          | Italy        |
| JX266263 | L1b1a12b       | Poland       |
| JX266264 | L2a1l2a        | Poland       |
| JX266265 | L2a1l2a1       | Poland       |
| JX303745 | L0k2a1a        | Zambia       |
| JX303746 | L1b1a10b       | Zambia       |
| JX303747 | L3e4a          | Zambia       |
| JX303748 | L2d1a          | Zambia       |
| JX303749 | L2a1c5         | Zambia       |
| JX303750 | L2c2a1         | Zambia       |
| JX303751 | L5a2           | Zambia       |
| JX303752 | L2a1g          | Zambia       |
| JX303753 | L0k2a1a        | Zambia       |
| JX303754 | L2a1b1a        | Zambia       |
| JX303755 | L1c2a1a        | Zambia       |
| JX303756 | L1b1a          | Zambia       |
| JX303757 | L0a1a2         | Zambia       |
| JX303758 | L3e1a2         | Zambia       |
| JX303759 | L3e1b2         | Zambia       |
| JX303760 | L2a1a2         | Zambia       |
| JX303761 | L2a1b1a        | Zambia       |

|          |          |          |
|----------|----------|----------|
| JX303762 | L0a1b1   | Zambia   |
| JX303763 | L0a2a2a  | Zambia   |
| JX303764 | L1b1a10b | Zambia   |
| JX303765 | L0k2a1a  | Zambia   |
| JX303766 | L0a1e    | Zambia   |
| JX303767 | L3e1d1   | Zambia   |
| JX303806 | L2a1d2   | Zambia   |
| JX303807 | L2b2a    | Zambia   |
| JX303808 | L3e1d1   | Zambia   |
| JX303809 | L1b2a    | Zambia   |
| JX303810 | L3d3a1   | Zambia   |
| JX303811 | L1c2b1b1 | Zambia   |
| JX303812 | L1b1a10b | Zambia   |
| JX303813 | L1b1a10b | Zambia   |
| JX303814 | L1b1a10b | Zambia   |
| JX303815 | L3d3a1b  | Zambia   |
| JX303816 | L1c2b1b1 | Zambia   |
| JX303817 | L0a1b1a  | Zambia   |
| JX303818 | L0d1b2a2 | Zambia   |
| JX303819 | L1b1a10b | Zambia   |
| JX303820 | L1c2b1b1 | Zambia   |
| JX303821 | L3d1b3a  | Zambia   |
| JX303822 | L3e2b1a2 | Zambia   |
| JX303823 | L0a1b1a  | Zambia   |
| JX303824 | L1c3a    | Zambia   |
| JX303825 | L2a1d2   | Zambia   |
| JX303826 | L0a2a2a  | Zambia   |
| JX303827 | L3e1a3a  | Zambia   |
| JX303828 | L1c2a1a  | Zambia   |
| JX303829 | L2a5     | Zambia   |
| JX303830 | L0a2a1b  | Zambia   |
| JX303831 | L0a2a2a1 | Zambia   |
| JX303832 | L2a1f    | Zambia   |
| JX303833 | L1c2b1b1 | Zambia   |
| JX303834 | L3d3a1b  | Zambia   |
| JX303835 | L0a2a2a1 | Zambia   |
| JX303836 | L3d3a1b  | Zambia   |
| JX303837 | L3e1a3a  | Zambia   |
| JX303838 | L2a1d2   | Zambia   |
| JX303839 | L3d3a1b  | Zambia   |
| JX303840 | L1b1a10b | Zambia   |
| JX303841 | L2b2a    | Zambia   |
| JX303842 | L3f1b1a1 | Zambia   |
| JX303843 | L3f2a1   | Zambia   |
| JX303882 | L2b1a3   | Zambia   |
| JX303883 | L1c2b1b1 | Zambia   |
| JX303884 | L3e1f1a  | Zambia   |
| JX303885 | L3e1e1   | Zambia   |
| JX303886 | L3e1d1a  | Zambia   |
| JX303887 | L3e1a3a  | Zambia   |
| JX303888 | L3f1b1a1 | Zambia   |
| JX303889 | L3e1d1a  | Zambia   |
| JX303890 | L3b1a1a  | Zambia   |
| JX303891 | L3e1d1   | Zambia   |
| JX303892 | L1b1a3   | Zambia   |
| JX303893 | L3e1a3a  | Zambia   |
| JX303894 | L3f2a1   | Zambia   |
| JX303895 | L0k2a1a  | Zambia   |
| JX303896 | L1b2a    | Zambia   |
| JX303897 | L0d2b1a1 | Zambia   |
| JX303898 | L1b1a3   | Zambia   |
| JX303899 | L0d2b1a1 | Zambia   |
| JX303900 | L1c2b1b1 | Zambia   |
| JX303901 | L1b1a3   | Zambia   |
| JX303902 | L3e1d1   | Zambia   |
| JX303903 | L0d2b1a1 | Zambia   |
| JX303904 | L0a2a2a  | Zambia   |
| JX303905 | L1b2a    | Zambia   |
| JX303906 | L2a1g    | Zambia   |
| JX303907 | L1c2a1a  | Zambia   |
| JX303908 | L3e1a3a  | Zambia   |
| JX303909 | L2a1i1   | Zambia   |
| JX303910 | L1c2b1b1 | Zambia   |
| JX303911 | L0a1a2   | Zambia   |
| JX303912 | L1c2a1a  | Zambia   |
| JX303913 | L1c2a1a  | Zambia   |
| JX524225 | L2a1c1a2 | Brazil   |
| JX666328 | L3b1a7   | USA      |
| KC152939 | L1c2b1a1 | Unknown  |
| KC257334 | L1c3b2   | USA      |
| KC257335 | L1c3b2   | USA      |
| KC257336 | L1c3b2   | USA      |
| KC345794 | L0k1a2   | Botswana |
| KC345795 | L0k1a2   | Botswana |
| KC345796 | L0k1a2   | Botswana |
| KC345797 | L0k1a2   | Botswana |
| KC345798 | L0d1b1a1 | Botswana |
| KC345799 | L0d1b1a1 | Botswana |
| KC345800 | L0d1b1a1 | Botswana |
| KC345801 | L0d1b1a1 | Botswana |
| KC345802 | L0d1b1a1 | Botswana |
| KC345803 | L0k1a2   | Botswana |

|          |            |          |
|----------|------------|----------|
| KC345804 | L0k1a2     | Botswana |
| KC345805 | L0k1a2     | Botswana |
| KC345806 | L0k1a2     | Botswana |
| KC345807 | L0d1b2a1   | Botswana |
| KC345808 | L0d1c2a    | Botswana |
| KC345809 | L0d1b2b2a  | Botswana |
| KC345810 | L0d1c1a1a1 | Botswana |
| KC345811 | L0d1c1a1a  | Botswana |
| KC345812 | L0d1c1a1a  | Botswana |
| KC345813 | L0d1c1a1a1 | Botswana |
| KC345814 | L0d1c      | Botswana |
| KC345815 | L0d1c2a1   | Botswana |
| KC345816 | L0d1c      | Botswana |
| KC345817 | L0d1c1a1a  | Botswana |
| KC345818 | L0d1c      | Botswana |
| KC345819 | L0d2a2     | Botswana |
| KC345820 | L0d2a2     | Botswana |
| KC345821 | L0k1a2     | Botswana |
| KC345822 | L0d1c1a1a2 | Botswana |
| KC345823 | L0d1c1a1a1 | Botswana |
| KC345824 | L0d1c1a2   | Botswana |
| KC345825 | L0d1a1a1   | Botswana |
| KC345826 | L0d1c1a1a  | Botswana |
| KC345827 | L0d1c2a    | Botswana |
| KC345828 | L0d1c2a    | Botswana |
| KC345829 | L0d1c1a1a2 | Botswana |
| KC345830 | L0d1c1a1a  | Botswana |
| KC345831 | L0d1a1a1   | Botswana |
| KC345870 | L0d1b2b1a  | Botswana |
| KC345871 | L0d1b2b1a  | Botswana |
| KC345872 | L0d1b2a1   | Botswana |
| KC345873 | L0d1b2b2c2 | Botswana |
| KC345874 | L0d1c1a1a  | Botswana |
| KC345875 | L0d1b2a1   | Botswana |
| KC345876 | L0d1b2a2   | Botswana |
| KC345877 | L0d1b2b1a  | Botswana |
| KC345878 | L0d1b2b1a  | Botswana |
| KC345879 | L0d1b2b1a  | Botswana |
| KC345880 | L0d1b2b2c1 | Botswana |
| KC345881 | L0d1b2b1a  | Botswana |
| KC345882 | L0d1b2b2c1 | Botswana |
| KC345883 | L0d1b2b1a  | Botswana |
| KC345884 | L0d1b2b1a  | Botswana |
| KC345885 | L0d1c1a1a  | Botswana |
| KC345886 | L0d2a1a    | Botswana |
| KC345887 | L0d2a1a    | Botswana |

|          |            |          |
|----------|------------|----------|
| KC345888 | L0d2b1b    | Botswana |
| KC345889 | L0d2a1a    | Botswana |
| KC345890 | L0d2a1a    | Botswana |
| KC345891 | L0d2d      | Botswana |
| KC345892 | L0d2c1b    | Botswana |
| KC345893 | L0k1a1a    | Botswana |
| KC345894 | L0k1a1     | Botswana |
| KC345895 | L0k1a1a    | Botswana |
| KC345896 | L0k1a1a    | Botswana |
| KC345897 | L0k1a1d    | Botswana |
| KC345898 | L0k1a1a    | Botswana |
| KC345899 | L0k1a1     | Botswana |
| KC345900 | L0d1b2b1a  | Botswana |
| KC345901 | L0d1b2b2c1 | Botswana |
| KC345902 | L0d1b2a2   | Botswana |
| KC345903 | L0d1b2a2   | Botswana |
| KC345904 | L0d1b2b1a  | Botswana |
| KC345905 | L0d1a1b    | Botswana |
| KC345906 | L0d1c1a1b  | Botswana |
| KC345907 | L0d1c1a1b  | Botswana |
| KC345946 | L0d1c1a1a  | Botswana |
| KC345947 | L0d1c1a1a  | Botswana |
| KC345948 | L0d1b2a2   | Botswana |
| KC345949 | L0d1b2b1a  | Botswana |
| KC345950 | L0d1c1a2   | Botswana |
| KC345951 | L0d1b2b2a  | Botswana |
| KC345952 | L0d2a1a1   | Botswana |
| KC345953 | L0d2a2     | Botswana |
| KC345954 | L0d2b1b    | Botswana |
| KC345955 | L0d2a1a1a  | Botswana |
| KC345956 | L0d2b1a1   | Botswana |
| KC345957 | L0d2b1a1a  | Botswana |
| KC345958 | L0d2a1a    | Botswana |
| KC345959 | L0d2b1b    | Botswana |
| KC345960 | L0d2a1a1a  | Botswana |
| KC345961 | L0k1a2     | Botswana |
| KC345962 | L0k1a1     | Botswana |
| KC345963 | L0k1a1     | Botswana |
| KC345964 | L0k1a1a    | Botswana |
| KC345965 | L0k1a1b    | Botswana |
| KC345966 | L0k1a1d    | Botswana |
| KC345967 | L0d1c1a1a1 | Botswana |
| KC345968 | L0d1c1a1b  | Botswana |
| KC345969 | L0d1a1b1a  | Botswana |
| KC345970 | L0d1b2b2a  | Botswana |
| KC345971 | L0d1a1b1a  | Botswana |

|          |            |          |
|----------|------------|----------|
| KC345972 | L0d1b2a1   | Botswana |
| KC345973 | L0d1a1b1a  | Botswana |
| KC345974 | L0d1a1b    | Botswana |
| KC345975 | L0d1c1a1a  | Botswana |
| KC345976 | L0d1a1b1a  | Botswana |
| KC345977 | L0d1b2b2b  | Botswana |
| KC345978 | L0d1a1b1a  | Botswana |
| KC345979 | L0d1a1b1a  | Botswana |
| KC345980 | L0d1a1b1   | Botswana |
| KC345981 | L0d1c1a2   | Botswana |
| KC345982 | L0k1a3     | Botswana |
| KC345983 | L0d1b2b2a  | Botswana |
| KC346022 | L0d2a1a1   | Botswana |
| KC346023 | L0k1a1d    | Botswana |
| KC346024 | L0k1a1b    | Botswana |
| KC346025 | L0d1c2a    | Botswana |
| KC346026 | L0d1c1a1a2 | Botswana |
| KC346027 | L0d1b2a1   | Botswana |
| KC346028 | L0d1b2a1   | Botswana |
| KC346029 | L0d1b2a1   | Botswana |
| KC346030 | L0d1c1a1a  | Botswana |
| KC346031 | L0d1c1a1a  | Botswana |
| KC346032 | L0d1c2a    | Botswana |
| KC346033 | L0d2a1a1   | Botswana |
| KC346034 | L0k1a2     | Botswana |
| KC346035 | L0k1a2     | Botswana |
| KC346036 | L0d1b2a1   | Botswana |
| KC346037 | L0d1c2a1   | Botswana |
| KC346038 | L0d1c1a2   | Botswana |
| KC346039 | L0d1c1a1a  | Botswana |
| KC346040 | L0d1c1a1a  | Botswana |
| KC346041 | L0d1c1a1a  | Botswana |
| KC346042 | L0d1c1a1a1 | Botswana |
| KC346043 | L0d1b2a1   | Botswana |
| KC346044 | L0d2a1c    | Botswana |
| KC346045 | L0d2a1c    | Botswana |
| KC346046 | L0k1a2a    | Botswana |
| KC346047 | L0d1c1a1a  | Botswana |
| KC346048 | L0k1a1d    | Botswana |
| KC346049 | L0k1a1d    | Botswana |
| KC346050 | L0d1b2b2a  | Botswana |
| KC346051 | L0d1b2b2a  | Botswana |
| KC346052 | L0d2c2a1a  | Botswana |
| KC346053 | L0d2c2a1a  | Botswana |
| KC346054 | L0k1a1b    | Botswana |
| KC346055 | L0k1a1d    | Botswana |

|          |            |          |
|----------|------------|----------|
| KC346056 | L0d1b2b2a  | Botswana |
| KC346057 | L0d1b2b2a  | Botswana |
| KC346058 | L0d1c1a1a  | Botswana |
| KC346059 | L0d1b2a1   | Botswana |
| KC346098 | L0d1c1a1a  | Namibia  |
| KC346099 | L0d1c1a1b  | Namibia  |
| KC346100 | L0d1c1a1a  | Namibia  |
| KC346101 | L0d1c1a1b  | Namibia  |
| KC346102 | L0d1a1a2   | Namibia  |
| KC346103 | L0d1c1a1a  | Namibia  |
| KC346104 | L0d2c1     | Namibia  |
| KC346105 | L0d2c1     | Namibia  |
| KC346106 | L0d2a1a1   | Namibia  |
| KC346107 | L0k1a1a    | Namibia  |
| KC346108 | L0k1a1c    | Namibia  |
| KC346109 | L0k1a1b    | Namibia  |
| KC346110 | L0k1a1a    | Namibia  |
| KC346111 | L0k1a1     | Namibia  |
| KC346112 | L0k1a1     | Namibia  |
| KC346113 | L0k1a1     | Namibia  |
| KC346114 | L0k1a1a    | Namibia  |
| KC346115 | L0k1a1     | Namibia  |
| KC346116 | L0d1b1a1   | Namibia  |
| KC346117 | L0d1b1a1   | Namibia  |
| KC346118 | L0k1a2     | Namibia  |
| KC346119 | L0k1a2     | Namibia  |
| KC346120 | L0d1b1a1   | Namibia  |
| KC346121 | L0k1b      | Namibia  |
| KC346122 | L0d1b1a1   | Namibia  |
| KC346123 | L0d1c1a1a  | Namibia  |
| KC346124 | L0d1b2a1   | Namibia  |
| KC346125 | L0d1b1b1   | Namibia  |
| KC346126 | L0d1b2b1a  | Namibia  |
| KC346127 | L0d2a1a1   | Namibia  |
| KC346128 | L0d1b2b1b  | Namibia  |
| KC346129 | L0d1a1c    | Namibia  |
| KC346130 | L0d2b1b    | Namibia  |
| KC346131 | L0d2c1b    | Namibia  |
| KC346132 | L0d2c1b    | Namibia  |
| KC346133 | L0k1a1c    | Namibia  |
| KC346134 | L0d1c1a1b  | Namibia  |
| KC346135 | L0d1b2b2c2 | Namibia  |
| KC346174 | L0d2a1a    | Namibia  |
| KC346175 | L0d1a1b1a  | Namibia  |
| KC346176 | L0d1a1b1a  | Namibia  |
| KC346177 | L0d1b2b2c1 | Namibia  |

|          |            |              |          |           |              |
|----------|------------|--------------|----------|-----------|--------------|
| KC346178 | L0d2a1a    | Namibia      | KC533470 | L3e1f1a   | South Africa |
| KC346179 | L0k1a1     | Namibia      | KC533472 | L2a1g     | South Africa |
| KC346180 | L0k1a1a    | Namibia      | KC533474 | L3b1a11   | South Africa |
| KC346181 | L0d1b2a2   | Namibia      | KC533475 | L0d3b     | South Africa |
| KC346182 | L0d1b2a2   | Namibia      | KC533476 | L0a1b1a1  | South Africa |
| KC346183 | L0d1c2     | Namibia      | KC533477 | L0d2a1b   | South Africa |
| KC346184 | L0d1b2a2   | Namibia      | KC533478 | L0d1a1b1b | South Africa |
| KC346185 | L0d1c1a1b  | Namibia      | KC533479 | L0a2a2a   | South Africa |
| KC346186 | L0d1c3     | Namibia      | KC533480 | L1c2a3a   | South Africa |
| KC346187 | L0d1b2b1a  | Namibia      | KC533481 | L0d2a1    | South Africa |
| KC346188 | L0d1c1a1b  | Namibia      | KC533483 | L3e1a1a   | South Africa |
| KC346189 | L0d1a1b    | Namibia      | KC533484 | L3e3a     | South Africa |
| KC346190 | L0d1c1a1a  | Namibia      | KC533485 | L2a1b1a   | South Africa |
| KC346191 | L0d1c3     | Namibia      | KC533486 | L0d2a1a   | South Africa |
| KC346192 | L0d1c1a1a  | Namibia      | KC533487 | L0d1a1d   | South Africa |
| KC346193 | L0d2a1c    | Namibia      | KC533488 | L3e1a3a   | South Africa |
| KC346194 | L0d2a1a    | Namibia      | KC533490 | L0d1c1a   | South Africa |
| KC346195 | L0d2a1a    | Namibia      | KC533494 | L0d2c1    | South Africa |
| KC346196 | L0d2a1a1   | Namibia      | KC533495 | L0a2a2a   | South Africa |
| KC346197 | L0d2a1c    | Namibia      | KC533496 | L0a1b1a1  | South Africa |
| KC346198 | L0d2a1c    | Namibia      | KC533497 | L0d1a1c   | South Africa |
| KC346199 | L0k1a2a    | Namibia      | KC533498 | L0a1b1a1  | South Africa |
| KC346200 | L0k1a1     | Namibia      | KC533500 | L2a1f3    | South Africa |
| KC346201 | L0k1a1     | Namibia      | KC533502 | L0d2a1a   | South Africa |
| KC346202 | L0k1a2a    | Namibia      | KC533503 | L2a1b1a   | South Africa |
| KC346203 | L0k1a2a    | Namibia      | KC533504 | L2a1b1a   | South Africa |
| KC346204 | L0k1a1a    | Namibia      | KC622084 | L3d3a1a   | Namibia      |
| KC346205 | L0k1a1d    | Namibia      | KC622085 | L3f1b4a   | Namibia      |
| KC346206 | L0d2c1a1   | Namibia      | KC622086 | L3f1b4a   | Namibia      |
| KC346207 | L0d2b1a    | Namibia      | KC622087 | L3d3a1a   | Namibia      |
| KC346208 | L0d1c1a1a  | Namibia      | KC622088 | L3d3a1a   | Namibia      |
| KC346209 | L0d1b2b2b1 | Namibia      | KC622089 | L3d3a1    | Namibia      |
| KC346210 | L0d2c1a    | Namibia      | KC622090 | L3d3a1    | Namibia      |
| KC346211 | L0d2a1a    | Namibia      | KC622091 | L3f1b4a   | Namibia      |
| KC533453 | L3e1b2     | South Africa | KC622092 | L3d3a1a   | Namibia      |
| KC533454 | L2a1b1a    | South Africa | KC622093 | L3f1b4a   | Namibia      |
| KC533455 | L2c2b1b    | South Africa | KC622094 | L3f1b4a   | Namibia      |
| KC533456 | L1c2a3a    | South Africa | KC622095 | L3f1b4a   | Namibia      |
| KC533458 | L3d1a1a1   | South Africa | KC622096 | L3d3a1    | Namibia      |
| KC533460 | L3e1a1a    | South Africa | KC622097 | L3d3a1a   | Namibia      |
| KC533461 | L3e1a1a    | South Africa | KC622098 | L3e2b1    | Namibia      |
| KC533462 | L2a1a2     | South Africa | KC622099 | L3d3a1a   | Namibia      |
| KC533463 | L3e3b1     | South Africa | KC622100 | L0g       | Namibia      |
| KC533466 | L0a1b1a1   | South Africa | KC622101 | L3d3a1    | Namibia      |
| KC533467 | L1c2a3a    | South Africa | KC622102 | L3d3a1a   | Namibia      |
| KC533469 | L3e1b2     | South Africa | KC622103 | L3f1b4a   | Namibia      |

|          |           |          |
|----------|-----------|----------|
| KC622104 | L0a1b1a1  | Namibia  |
| KC622105 | L2a1f     | Namibia  |
| KC622106 | L0a1b1a1  | Botswana |
| KC622107 | L0a1b1a   | Botswana |
| KC622108 | L3d3a1    | Namibia  |
| KC622109 | L5a2      | Botswana |
| KC622110 | L2a1d2    | Botswana |
| KC622111 | L5a2      | Botswana |
| KC622112 | L0a1b1a1  | Botswana |
| KC622113 | L3e1b2    | Botswana |
| KC622114 | L0a1b1a1  | Botswana |
| KC622115 | L0a1b1a1  | Botswana |
| KC622116 | L3e1a3a   | Botswana |
| KC622117 | L0a1b1a1  | Botswana |
| KC622118 | L2a1f3    | Botswana |
| KC622119 | L3e1b2    | Botswana |
| KC622120 | L3f1b4a   | Namibia  |
| KC622121 | L0a1b1a1  | Namibia  |
| KC622160 | L3f1b4a   | Namibia  |
| KC622161 | L3d3a1    | Namibia  |
| KC622162 | L1b1a     | Namibia  |
| KC622163 | L2b1a3    | Namibia  |
| KC622164 | L0a1b1a1  | Namibia  |
| KC622165 | L3e1a2    | Namibia  |
| KC622166 | L3e1a2    | Namibia  |
| KC622167 | L3e1a2    | Namibia  |
| KC622168 | L3e1a2    | Namibia  |
| KC622169 | L2a1i1    | Namibia  |
| KC622170 | L1c2a1a   | Namibia  |
| KC622171 | L3e1e1    | Namibia  |
| KC622172 | L3e2b+152 | Namibia  |
| KC622173 | L1c2b1b1  | Namibia  |
| KC622174 | L3d3a1a   | Namibia  |
| KC622175 | L3d3a1    | Namibia  |
| KC622176 | L0g       | Namibia  |
| KC622177 | L3d3a1a   | Namibia  |
| KC622178 | L1b1a     | Namibia  |
| KC622179 | L4b2a2c   | Botswana |
| KC622180 | L1c3a1a   | Namibia  |
| KC622181 | L3d3a1a   | Namibia  |
| KC622182 | L3d3a1a   | Namibia  |
| KC622183 | L3e1e1    | Namibia  |
| KC622184 | L2a1a3c   | Namibia  |
| KC622185 | L3d1a1a   | Namibia  |
| KC622186 | L3d3a1a   | Namibia  |
| KC622187 | L0a2a2a   | Namibia  |

|          |          |          |
|----------|----------|----------|
| KC622188 | L3d3a1a  | Namibia  |
| KC622189 | L3d3a1a  | Namibia  |
| KC622190 | L3d3a1a  | Namibia  |
| KC622191 | L1c2a3   | Namibia  |
| KC622192 | L3d3a1a  | Namibia  |
| KC622193 | L3d3a1a  | Namibia  |
| KC622194 | L1c2a3   | Namibia  |
| KC622195 | L3d3a1a  | Namibia  |
| KC622196 | L3e1a2   | Namibia  |
| KC622197 | L3e1a2   | Namibia  |
| KC622236 | L2a1c    | Botswana |
| KC622237 | L3e1e1   | Botswana |
| KC622238 | L2a1a    | Botswana |
| KC622239 | L3e1e1   | Botswana |
| KC622240 | L3e1e1   | Botswana |
| KC622241 | L3d3a1   | Botswana |
| KC622242 | L3f1b1a  | Botswana |
| KC622243 | L2a1d2   | Botswana |
| KC622244 | L2a1a    | Botswana |
| KC622245 | L2a1b1a  | Botswana |
| KC622246 | L2a1d2   | Botswana |
| KC622247 | L3d3a1   | Botswana |
| KC622248 | L2a1d2   | Botswana |
| KC622249 | L0a2a2a  | Botswana |
| KC622250 | L5b1     | Botswana |
| KC622251 | L5b1     | Botswana |
| KC622252 | L3b1a1   | Botswana |
| KC622253 | L3d3a1   | Botswana |
| KC622254 | L2a1d2   | Botswana |
| KC622255 | L5a2     | Botswana |
| KC622256 | L5a2     | Botswana |
| KC622257 | L3e1a2   | Botswana |
| KC622258 | L4b2a2c  | Botswana |
| KC622259 | L4b2a2c  | Botswana |
| KC622260 | L3e2b    | Botswana |
| KC622261 | L1b1a10b | Botswana |
| KC622262 | L3d3a1   | Botswana |
| KC622263 | L3d1a1a1 | Botswana |
| KC622264 | L3d1a1a1 | Botswana |
| KC622265 | L2a1c    | Botswana |
| KC622267 | L2a1h    | Botswana |
| KC622268 | L3e1e1   | Botswana |
| KC622269 | L3f1b1a  | Botswana |
| KC622270 | L2a1d2   | Botswana |
| KC622271 | L1c2b1b  | Botswana |
| KC622272 | L0a1b1a1 | Botswana |



|          |             |                    |
|----------|-------------|--------------------|
| KC911354 | L2a1f3      | Iran               |
| KC911360 | L3f1b+16292 | Iran               |
| KF055328 | L3e1a1a     | USA                |
| KF055329 | L3f1b1a     | USA                |
| KF055330 | L2c         | USA                |
| KF055331 | L1c4b       | USA                |
| KF055332 | L2a1c4a1    | USA                |
| KF055869 | L2c         | Spain              |
| KF055870 | L2c         | Spain              |
| KF161500 | L3b1a1a     | Denmark            |
| KF162786 | L4b         | Denmark            |
| KF179062 | L1b1a8      | USA                |
| KF255394 | L2a1l1a     | Dominican Republic |
| KF358472 | L3e5e       | Cameroon           |
| KF358473 | L3e5c       | Cameroon           |
| KF358474 | L3e5c       | Cameroon           |
| KF358475 | L3e5a1a     | Cameroon           |
| KF358476 | L3e5b       | Niger              |
| KF358477 | L3e5a1a     | Cameroon           |
| KF358478 | L3e5        | Cameroon           |
| KF358479 | L3e5        | Chad               |
| KF358480 | L3e5f       | Chad               |
| KF358481 | L3e5f       | Chad               |
| KF358482 | L3e5c       | Nigeria            |
| KF358483 | L3e5b       | Nigeria            |
| KF358484 | L3e5d       | Nigeria            |
| KF358485 | L3e5        | Cameroon           |
| KF358486 | L3e5b       | Cameroon           |
| KF358487 | L3e5d       | Cameroon           |
| KF358488 | L3e5b       | Cameroon           |
| KF358489 | L3e5b       | Cameroon           |
| KF358490 | L3e5e       | Cameroon           |
| KF358712 | L1c3b1a     | Puerto Rico        |
| KF450887 | L1b1a3a     | Pakistan           |
| KF450890 | L2a1f3      | Pakistan           |
| KF450894 | L3d1a1a     | Pakistan           |
| KF450895 | L2a1g       | Pakistan           |
| KF450901 | L0a1b1a1    | Pakistan           |
| KF450910 | L2a1a2      | Pakistan           |
| KF450917 | L1c2b2      | Pakistan           |
| KF451141 | L2a1c3a     | Israel             |
| KF451144 | L0a1b1a     | Israel             |
| KF451149 | L2b1a2      | Israel             |
| KF451150 | L1b1a2      | Israel             |
| KF451154 | L0a1a1      | Israel             |
| KF451163 | L0a1a       | Israel             |

|          |                |                          |
|----------|----------------|--------------------------|
| KF451169 | L3h1a2a1       | Israel                   |
| KF451202 | L2a1c+16129    | Israel                   |
| KF451203 | L3f1b+16292    | Israel                   |
| KF451221 | L3e1b1         | Israel                   |
| KF451224 | L1b1a2         | Israel                   |
| KF451250 | L3e3a          | Israel                   |
| KF451254 | L2a1+143+16189 | Israel                   |
| KF451258 | L2a1+143+16189 | Israel                   |
| KF451260 | L3e1b1         | Israel                   |
| KF451418 | L3d1b          | Senegal                  |
| KF451419 | L1b1a4a        | Senegal                  |
| KF451420 | L1b1a14        | Senegal                  |
| KF451421 | L1b1a17        | Senegal                  |
| KF451422 | L2a1c3b1       | Senegal                  |
| KF451423 | L3d1d          | Senegal                  |
| KF451424 | L3e4a1         | Senegal                  |
| KF451425 | L1b1a          | Senegal                  |
| KF451426 | L3b1a          | Senegal                  |
| KF451427 | L1b1a17        | Senegal                  |
| KF451428 | L2a1c3b1       | Senegal                  |
| KF451429 | L3b1a          | Senegal                  |
| KF451430 | L2c3a          | Senegal                  |
| KF451431 | L2a1c1         | Senegal                  |
| KF451432 | L3e4a1         | Senegal                  |
| KF451433 | L2c5           | Senegal                  |
| KF451434 | L2a1c5         | Nigeria                  |
| KF451435 | L2a1c5         | Nigeria                  |
| KF451436 | L3f1b4c        | Nigeria                  |
| KF451437 | L3f1b4c        | Nigeria                  |
| KF451438 | L1b1a3         | Nigeria                  |
| KF451439 | L3f1b4c        | Nigeria                  |
| KF451440 | L3f1b1a        | Nigeria                  |
| KF451545 | L0d1c1a1a      | Namibia                  |
| KF451589 | L2a2b1a        | Congo                    |
| KF451590 | L1c1a2b        | Central African Republic |
| KF451591 | L1c1a1a1a      | Central African Republic |
| KF451592 | L1c1a2b        | Central African Republic |
| KF451593 | L1c1a2a2       | Central African Republic |
| KF451594 | L1c1a2b        | Central African Republic |
| KF451595 | L1c1a1a1a      | Central African Republic |
| KF451596 | L1c1a1a1a      | Central African Republic |
| KF451597 | L1c4b          | Central African Republic |

|          |           |                          |          |             |        |
|----------|-----------|--------------------------|----------|-------------|--------|
| KF451598 | L0a2a1    | Central African Republic | KJ185405 | L3e1a1a     | Zambia |
| KF451599 | L1c1a2b   | Central African Republic | KJ185406 | L3f1b4c     | Zambia |
| KF451600 | L1c4b     | Central African Republic | KJ185407 | L4b2a       | Zambia |
| KF451653 | L2c3a     | Senegal                  | KJ185408 | L0f1        | Zambia |
| KF451654 | L2c1a     | Senegal                  | KJ185409 | L3d1a1a     | Zambia |
| KF451655 | L2c1a     | Senegal                  | KJ185410 | L3e1d1      | Zambia |
| KF451656 | L1b1a4    | Senegal                  | KJ185411 | L3f1b1a1    | Zambia |
| KF451712 | L3e2b1    | Algeria                  | KJ185412 | L1b1a15     | Zambia |
| KF451714 | L2a1+143  | Algeria                  | KJ185413 | L1b1a3      | Zambia |
| KF451723 | L3e2a     | Algeria                  | KJ185414 | L3b1a       | Zambia |
| KF451729 | L3b1a7    | Algeria                  | KJ185415 | L3b1a       | Zambia |
| KF451734 | L3e2a1b1  | Algeria                  | KJ185416 | L3e2b+152   | Zambia |
| KF451735 | L2a1c2    | Senegal                  | KJ185417 | L1b1a3      | Zambia |
| KF451736 | L2c3a     | Senegal                  | KJ185418 | L1c2b1b1    | Zambia |
| KF451737 | L2a1c3b1  | Senegal                  | KJ185419 | L1c2b1b     | Zambia |
| KF451738 | L1b1a     | Senegal                  | KJ185420 | L1c2a1a     | Zambia |
| KF451850 | L3b1a1a   | Kenya                    | KJ185421 | L2d1a       | Zambia |
| KF451851 | L0a2a2a   | Kenya                    | KJ185422 | L3e2b3      | Zambia |
| KF451852 | L2a1f3    | Kenya                    | KJ185423 | L0a1b1a1    | Zambia |
| KF451853 | L1c2a1a   | Kenya                    | KJ185424 | L0a2a1a     | Zambia |
| KF451854 | L3b1a1a   | Kenya                    | KJ185425 | L0a1b1a1    | Zambia |
| KF451855 | L1c2a1a   | Kenya                    | KJ185426 | L1c2b1b1    | Zambia |
| KF451856 | L3b1a1a   | Kenya                    | KJ185465 | L1c1        | Zambia |
| KF451857 | L5a1      | Kenya                    | KJ185466 | L1c2a2      | Zambia |
| KF451858 | L3h1a1    | Kenya                    | KJ185467 | L1c2b1b     | Zambia |
| KF451859 | L3e2b+152 | Kenya                    | KJ185468 | L2a1c5      | Zambia |
| KF451860 | L0a1a1    | Kenya                    | KJ185469 | L3b1a1a     | Zambia |
| KF451861 | L0a1a2    | Kenya                    | KJ185470 | L3b1a11     | Zambia |
| KF672834 | L0a2a1a2  | São Tomé e Príncipe      | KJ185471 | L3e1e1      | Zambia |
| KF672835 | L0a2a2a   | Somalia                  | KJ185472 | L3e1a3a     | Zambia |
| KF672836 | L0a1a1    | Sudan                    | KJ185473 | L3e1        | Zambia |
| KF672837 | L0a1a1    | Sudan                    | KJ185474 | L3e2b1a2    | Zambia |
| KF952774 | L2a1l1a2  | USA                      | KJ185475 | L3e1e1      | Zambia |
| KJ185394 | L0a2a2a   | Zambia                   | KJ185476 | L0a2a1b     | Angola |
| KJ185395 | L3f1b4c   | Zambia                   | KJ185477 | L0a2a2a     | Angola |
| KJ185396 | L0a2a1a   | Zambia                   | KJ185478 | L0a2a2a     | Angola |
| KJ185397 | L0a2a1b   | Zambia                   | KJ185479 | L0a2a2a     | Angola |
| KJ185398 | L0a1b1    | Zambia                   | KJ185480 | L0a2a1b     | Angola |
| KJ185399 | L0a2d     | Zambia                   | KJ185481 | L1c1b       | Angola |
| KJ185400 | L0f1      | Zambia                   | KJ185482 | L1c2b2      | Angola |
| KJ185401 | L1b1a+189 | Zambia                   | KJ185483 | L1c2b1b1    | Angola |
| KJ185402 | L1c3b1a   | Zambia                   | KJ185484 | L1c2b1b     | Angola |
| KJ185403 | L2a1d2    | Zambia                   | KJ185485 | L1c3a1a     | Angola |
| KJ185404 | L3b1b     | Zambia                   | KJ185486 | L2a1c+16129 | Angola |
|          |           |                          | KJ185487 | L2a1c4a1    | Angola |
|          |           |                          | KJ185488 | L2a1c4a1    | Angola |

|          |          |        |
|----------|----------|--------|
| KJ185489 | L2b1a3   | Angola |
| KJ185490 | L3d1a1a  | Angola |
| KJ185491 | L3d3a1   | Angola |
| KJ185492 | L3e1e1   | Angola |
| KJ185493 | L3e2b    | Angola |
| KJ185494 | L0a2a1b  | Angola |
| KJ185495 | L0a2a1b  | Angola |
| KJ185496 | L0a2a1b  | Angola |
| KJ185497 | L0a1b2   | Angola |
| KJ185498 | L0a2a1b  | Angola |
| KJ185499 | L0a2a1b  | Angola |
| KJ185500 | L0a2a1b  | Angola |
| KJ185501 | L0a2a1b  | Angola |
| KJ185502 | L0a1b2   | Angola |
| KJ185541 | L0a2a2a1 | Zambia |
| KJ185542 | L0a1b1a1 | Zambia |
| KJ185543 | L0a2a1b  | Zambia |
| KJ185544 | L0a2a2a  | Zambia |
| KJ185545 | L0a1b1a1 | Zambia |
| KJ185546 | L0a2a1b  | Zambia |
| KJ185547 | L0a1b1a1 | Zambia |
| KJ185548 | L0a1b1a1 | Zambia |
| KJ185549 | L0a1b1a1 | Zambia |
| KJ185550 | L0a2a2a1 | Zambia |
| KJ185551 | L0a1b2a  | Zambia |
| KJ185552 | L0a1b1a1 | Zambia |
| KJ185553 | L0a2a2a1 | Zambia |
| KJ185554 | L0a1b1a1 | Zambia |
| KJ185555 | L0a1b1a1 | Zambia |
| KJ185556 | L0a2a2a  | Zambia |
| KJ185557 | L0a2a1b  | Zambia |
| KJ185558 | L1b2a    | Zambia |
| KJ185559 | L1b2a    | Zambia |
| KJ185560 | L1b2a    | Zambia |
| KJ185561 | L1b1a10b | Zambia |
| KJ185562 | L1c1d    | Zambia |
| KJ185563 | L1c3a    | Zambia |
| KJ185564 | L1c2a1a  | Zambia |
| KJ185565 | L1c1b    | Zambia |
| KJ185566 | L1c2a1a  | Zambia |
| KJ185567 | L1c2b1b1 | Zambia |
| KJ185568 | L1c2b1b1 | Zambia |
| KJ185569 | L1c2b1b1 | Zambia |
| KJ185570 | L1c2a1a  | Zambia |
| KJ185571 | L1c2a1a  | Zambia |
| KJ185572 | L1c2b1b1 | Zambia |
| KJ185573 | L1c2a1a  | Zambia |
| KJ185574 | L1c1d    | Zambia |
| KJ185575 | L1c3a    | Zambia |
| KJ185576 | L1c2b1b1 | Zambia |
| KJ185577 | L1c3b1a  | Zambia |
| KJ185578 | L1c2b1b1 | Zambia |
| KJ185617 | L3e1d1a  | Zambia |
| KJ185618 | L3e1d1   | Zambia |
| KJ185619 | L3e3b    | Zambia |
| KJ185620 | L3e1a3a  | Zambia |
| KJ185621 | L3e1a3a  | Zambia |
| KJ185622 | L3e1d1a  | Zambia |
| KJ185623 | L3e1e1   | Zambia |
| KJ185624 | L3e2b    | Zambia |
| KJ185625 | L3e1d1a  | Zambia |
| KJ185626 | L3e1a3a  | Zambia |
| KJ185627 | L3e1d1   | Zambia |
| KJ185628 | L3e1a3a  | Zambia |
| KJ185629 | L3e1a3a  | Zambia |
| KJ185630 | L3e1e1   | Zambia |
| KJ185631 | L3e2b    | Zambia |
| KJ185632 | L3e2a1b1 | Zambia |
| KJ185633 | L3e1a3a  | Zambia |
| KJ185634 | L3e1d1   | Zambia |
| KJ185635 | L3e2b    | Zambia |
| KJ185636 | L3e3b    | Zambia |
| KJ185637 | L3e3b2   | Zambia |
| KJ185638 | L3e3b1   | Zambia |
| KJ185639 | L3e1a3a  | Zambia |
| KJ185640 | L3e3a    | Zambia |
| KJ185641 | L3e1d1a  | Zambia |
| KJ185642 | L3e1a3a  | Zambia |
| KJ185643 | L3e1a3a  | Zambia |
| KJ185644 | L3e1d1a  | Zambia |
| KJ185645 | L3e1a3a  | Zambia |
| KJ185646 | L3e2b    | Zambia |
| KJ185647 | L3f1b4a  | Zambia |
| KJ185648 | L5a2     | Zambia |
| KJ185649 | L5a2     | Zambia |
| KJ185650 | L1c3b1a  | Zambia |
| KJ185651 | L1c2a1a  | Zambia |
| KJ185652 | L3e1d1   | Zambia |
| KJ185653 | L0a2a1b  | Zambia |
| KJ185654 | L0a2a1b  | Zambia |
| KJ185693 | L2a1g    | Zambia |
| KJ185694 | L2b2a    | Zambia |

|          |           |        |
|----------|-----------|--------|
| KJ185695 | L2e1a     | Zambia |
| KJ185696 | L3b1a11   | Zambia |
| KJ185697 | L3d3a1    | Zambia |
| KJ185698 | L3e1a3a   | Zambia |
| KJ185699 | L3e3b     | Zambia |
| KJ185700 | L3e4a     | Zambia |
| KJ185701 | L3e1e1    | Zambia |
| KJ185702 | L3e1a1a   | Zambia |
| KJ185703 | L3e1a3a   | Zambia |
| KJ185704 | L3e1      | Zambia |
| KJ185705 | L3e1a3a   | Zambia |
| KJ185706 | L3e1d1    | Zambia |
| KJ185707 | L3e1b2    | Zambia |
| KJ185708 | L3e1a3a   | Zambia |
| KJ185709 | L3e3b     | Zambia |
| KJ185710 | L3e3b2    | Zambia |
| KJ185711 | L3e1a3a   | Zambia |
| KJ185712 | L3f2a1    | Zambia |
| KJ185713 | L3f1b1a1  | Zambia |
| KJ185714 | L5a2      | Zambia |
| KJ185715 | L5a2      | Zambia |
| KJ185716 | L5a2      | Zambia |
| KJ185717 | L0a2a1b   | Zambia |
| KJ185718 | L0a1b1a1  | Zambia |
| KJ185719 | L0a2a2a1  | Zambia |
| KJ185720 | L0a2a1b   | Zambia |
| KJ185721 | L0a2a2a   | Zambia |
| KJ185722 | L0a2a1a   | Zambia |
| KJ185723 | L1c2b2    | Zambia |
| KJ185724 | L1c3a     | Zambia |
| KJ185725 | L1c2b2    | Zambia |
| KJ185726 | L1c1b     | Zambia |
| KJ185727 | L1c3a1    | Zambia |
| KJ185728 | L2a1f     | Zambia |
| KJ185729 | L2a5      | Zambia |
| KJ185730 | L2a5      | Zambia |
| KJ185769 | L2a1a2    | Angola |
| KJ185770 | L2a1a3c   | Angola |
| KJ185771 | L2a1a3c   | Angola |
| KJ185772 | L2b1a3    | Angola |
| KJ185773 | L2c3      | Angola |
| KJ185774 | L2c2b1b   | Angola |
| KJ185775 | L2c2b1b   | Angola |
| KJ185776 | L3b1a1a   | Angola |
| KJ185777 | L3b1a1a   | Angola |
| KJ185778 | L3b1a10   | Angola |
| KJ185779 | L3d1a1a   | Angola |
| KJ185780 | L3d3a1    | Angola |
| KJ185781 | L3e2b     | Angola |
| KJ185782 | L3e1      | Angola |
| KJ185783 | L3e4a     | Angola |
| KJ185784 | L3e1e1    | Angola |
| KJ185785 | L3e3b1    | Angola |
| KJ185786 | L3e1a2    | Angola |
| KJ185787 | L3e2b1a2  | Angola |
| KJ185788 | L3e3b1    | Angola |
| KJ185789 | L3e1e1    | Angola |
| KJ185790 | L3e2b     | Angola |
| KJ185791 | L3e2b1a2  | Angola |
| KJ185792 | L3e1e1    | Angola |
| KJ185793 | L3e1a1a   | Angola |
| KJ185794 | L3e2b1a2  | Angola |
| KJ185795 | L3f1b4a   | Angola |
| KJ185796 | L3f1b4a   | Angola |
| KJ185797 | L3f1b4a   | Angola |
| KJ185798 | L3f1b4a   | Angola |
| KJ185799 | L3f1b1a   | Angola |
| KJ185800 | L3f1b4a   | Angola |
| KJ185801 | L3f1b4a   | Angola |
| KJ185802 | L0a2a2a   | Angola |
| KJ185803 | L0a2a2a1  | Angola |
| KJ185804 | L0a2a2a   | Angola |
| KJ185805 | L0a1b2a   | Angola |
| KJ185806 | L0a1a2    | Angola |
| KJ185845 | L3e2a1a   | Angola |
| KJ185846 | L3e3a     | Angola |
| KJ185847 | L3e2b     | Angola |
| KJ185848 | L3e1f     | Angola |
| KJ185849 | L3e2b+152 | Angola |
| KJ185850 | L3e1      | Angola |
| KJ185851 | L3e2b+152 | Angola |
| KJ185852 | L3e1d1    | Angola |
| KJ185853 | L3e1a1a   | Angola |
| KJ185854 | L3e1a1a   | Angola |
| KJ185855 | L3e1d1    | Angola |
| KJ185856 | L3e2b3    | Zambia |
| KJ185857 | L2b1a3    | Zambia |
| KJ185858 | L0a1b1a1  | Zambia |
| KJ185859 | L1c2b1b1  | Zambia |
| KJ185860 | L1c2a1a   | Zambia |
| KJ185861 | L3e2b1a2  | Zambia |
| KJ185862 | L0a2a2a   | Zambia |

|          |            |                          |
|----------|------------|--------------------------|
| KJ185863 | L0a1a2     | Zambia                   |
| KJ185864 | L3e2b      | Zambia                   |
| KJ185865 | L0a2a1b    | Zambia                   |
| KJ185866 | L1b2a      | Zambia                   |
| KJ185867 | L1b2a      | Zambia                   |
| KJ185868 | L1c3a      | Zambia                   |
| KJ185869 | L2b1a3     | Zambia                   |
| KJ185870 | L3e2b+152  | Zambia                   |
| KJ185871 | L3f2a1     | Zambia                   |
| KJ185872 | L1b1a10b   | Zambia                   |
| KJ185873 | L1c3a      | Zambia                   |
| KJ185874 | L1c2b2     | Zambia                   |
| KJ185875 | L1c3a1b    | Zambia                   |
| KJ185876 | L1c3b1a    | Zambia                   |
| KJ185877 | L2c2a1     | Zambia                   |
| KJ185878 | L3d3a1     | Zambia                   |
| KJ185879 | L3e1a3a    | Zambia                   |
| KJ185880 | L3e1a3a    | Zambia                   |
| KJ185881 | L0a2a1a    | Zambia                   |
| KJ185882 | L0a2a1a    | Zambia                   |
| KJ185921 | L1c2a1a    | Zambia                   |
| KJ185922 | L1c2b1b    | Zambia                   |
| KJ185923 | L2a1b1a    | Zambia                   |
| KJ185924 | L3e1a3a    | Zambia                   |
| KJ185925 | L3e1e1     | Zambia                   |
| KJ185926 | L0a1b2a    | Zambia                   |
| KJ185927 | L1c2b1b1   | Zambia                   |
| KJ185928 | L1c2b1b1   | Zambia                   |
| KJ185929 | L1c2b1b1   | Zambia                   |
| KJ185930 | L1c2b1b1   | Zambia                   |
| KJ185931 | L2a1b1a    | Zambia                   |
| KJ185932 | L2a5       | Zambia                   |
| KJ185933 | L2a1f1     | Zambia                   |
| KJ185934 | L2a1a2     | Zambia                   |
| KJ185935 | L3d2b      | Zambia                   |
| KJ185936 | L3e1d1     | Zambia                   |
| KJ185937 | L3f2a1     | Zambia                   |
| KJ185938 | L1b1a10b   | Zambia                   |
| KJ185939 | L2a1d2     | Zambia                   |
| KJ185940 | L3e1a2     | Zambia                   |
| KJ185941 | L1c3b1a    | Zambia                   |
| KJ185942 | L2a5       | Zambia                   |
| KJ185943 | L3e2b1a2   | Zambia                   |
| KJ185944 | L3e3b2     | Zambia                   |
| KJ185945 | L5a2       | Zambia                   |
| KJ185946 | L0a2a2a1   | Zambia                   |
| KJ185947 | L0a2a2a1   | Zambia                   |
| KJ185948 | L1c2b1b1   | Zambia                   |
| KJ185949 | L1c2b      | Zambia                   |
| KJ185950 | L1c3a      | Zambia                   |
| KJ185951 | L1c3a1b    | Zambia                   |
| KJ185952 | L2a5       | Zambia                   |
| KJ185953 | L2a5       | Zambia                   |
| KJ185954 | L2a5       | Zambia                   |
| KJ185955 | L2a1d2     | Zambia                   |
| KJ185956 | L2b1a3     | Zambia                   |
| KJ185957 | L3e1a3a    | Zambia                   |
| KJ185958 | L3e1e1     | Zambia                   |
| KJ185997 | L2a1a2a1a  | Zambia                   |
| KJ185998 | L2a1d2     | Zambia                   |
| KJ185999 | L2a1c      | Zambia                   |
| KJ186000 | L3e1e1     | Zambia                   |
| KJ186001 | L0a1b1a1   | Zambia                   |
| KJ186002 | L2a1f1     | Zambia                   |
| KJ186003 | L2a1h      | Zambia                   |
| KJ186004 | L0a1a2     | Zambia                   |
| KJ186005 | L0a1a2     | Zambia                   |
| KJ186006 | L3e2b      | Zambia                   |
| KJ186007 | L3e2b1     | Angola                   |
| KJ186008 | L0a1b2     | Angola                   |
| KJ186009 | L0a1       | Angola                   |
| KJ445738 | L0d3       | Pakistan                 |
| KJ445739 | L0d2a1a    | South Africa             |
| KJ445740 | L0d1b2a1   | Namibia                  |
| KJ445741 | L0d1b2a1   | Namibia                  |
| KJ445742 | L0d1b2b2c1 | Namibia                  |
| KJ445743 | L0d1b2b2b1 | South Africa             |
| KJ445744 | L0d1c3     | Namibia                  |
| KJ445745 | L0d1c1a1a  | Namibia                  |
| KJ445746 | L0k1a1a    | Namibia                  |
| KJ445747 | L0a1b1a1   | Pakistan                 |
| KJ445748 | L0a1b1a    | Israel                   |
| KJ445749 | L0a1a1     | Israel                   |
| KJ445750 | L0a1a1     | Kenya                    |
| KJ445751 | L0a1a      | Israel                   |
| KJ445752 | L0a1a2     | Kenya                    |
| KJ445753 | L0a2b1     | Congo                    |
| KJ445754 | L0a2b      | Congo                    |
| KJ445755 | L0a2b      | Congo                    |
| KJ445756 | L0a2b      | Congo                    |
| KJ445757 | L0a2a1     | Central African Republic |

|          |                |                          |
|----------|----------------|--------------------------|
| KJ445758 | L0a2a1         | Central African Republic |
| KJ445759 | L0a2a1         | Central African Republic |
| KJ445760 | L0a2a1         | Central African Republic |
| KJ445761 | L0a2a2a        | Kenya                    |
| KJ445762 | L0a2a2a        | Pakistan                 |
| KJ445801 | L1c2b2         | Pakistan                 |
| KJ445802 | L1b1a3a        | Pakistan                 |
| KJ445803 | L1b1a17        | Senegal                  |
| KJ445804 | L1b1a          | Senegal                  |
| KJ445805 | L1b1a2         | Israel                   |
| KJ445806 | L1b1a2         | Israel                   |
| KJ445807 | L1b1a4a        | Senegal                  |
| KJ445808 | L1b1a4         | Senegal                  |
| KJ445809 | L1b1a          | Nigeria                  |
| KJ445810 | L1b1a17        | Senegal                  |
| KJ445811 | L1b1a18        | Nigeria                  |
| KJ445812 | L1b1a3         | Nigeria                  |
| KJ445813 | L1b1a14        | Senegal                  |
| KJ445814 | L1b1a          | Senegal                  |
| KJ445815 | L1b1a10        | Nigeria                  |
| KJ446417 | L4b2a2c        | Namibia                  |
| KJ446418 | L3h1a2a1       | Israel                   |
| KJ446419 | L3h1a1         | Kenya                    |
| KJ446509 | L3d3a1a        | South Africa             |
| KJ446510 | L3d3a1a        | South Africa             |
| KJ446511 | L3d3a1a        | South Africa             |
| KJ446512 | L3d1d          | Senegal                  |
| KJ446513 | L3d6           | Nigeria                  |
| KJ446514 | L3f1b+16292    | Israel                   |
| KJ446515 | L3f1b1a        | Nigeria                  |
| KJ446516 | L3f1b4b        | Nigeria                  |
| KJ446517 | L3f1b4c        | Nigeria                  |
| KJ446518 | L3f1b4c        | Nigeria                  |
| KJ446519 | L3f1b4c        | Nigeria                  |
| KJ446532 | L3b1a7         | Algeria                  |
| KJ446533 | L3b1a1a        | Kenya                    |
| KJ446534 | L3b1a1a        | Kenya                    |
| KJ446535 | L3b1a1a        | Kenya                    |
| KJ446536 | L3b1a          | Senegal                  |
| KJ446537 | L3b1a          | Senegal                  |
| KJ446540 | L3e4a1         | Senegal                  |
| KJ446541 | L3e4a1         | Senegal                  |
| KJ446542 | L3e3a          | Israel                   |
| KJ446768 | L2a1c5         | Nigeria                  |
| KJ446769 | L2a1+143+16189 | Pakistan                 |
| KJ446770 | L2a1+143+16189 | Israel                   |
| KJ446771 | L2a1c3a        | Israel                   |
| KJ446772 | L2a1+143+16189 | Israel                   |
| KJ446773 | L2a1+143+16189 | Israel                   |
| KJ446774 | L2a1f          | Nigeria                  |
| KJ446775 | L2a1+143       | Algeria                  |
| KJ446776 | L2a1f3         | Kenya                    |
| KJ446777 | L2a1f3         | Pakistan                 |
| KJ446778 | L2a1f          | Nigeria                  |
| KJ669103 | L0k1a2a        | Namibia                  |
| KJ669104 | L0k1a2         | Namibia                  |
| KJ669105 | L0k1a2         | Namibia                  |
| KJ669106 | L0k1a1c        | Namibia                  |
| KJ669107 | L0k1a1a        | Namibia                  |
| KJ669108 | L0k1a1         | Namibia                  |
| KJ669109 | L0k1a1a        | Namibia                  |
| KJ669110 | L0k1a1c        | Namibia                  |
| KJ669111 | L0k1a1b        | Angola                   |
| KJ669112 | L0g            | Namibia                  |
| KJ669113 | L0a2a2a2       | Zimbabwe                 |
| KJ669114 | L0a1b1a1       | South Africa             |
| KJ669115 | L0a1b2         | Namibia                  |
| KJ669116 | L0a1b1         | Namibia                  |
| KJ669117 | L0a1b1a        | Namibia                  |
| KJ669118 | L0a2a2a        | Namibia                  |
| KJ669119 | L0a2a2a        | Namibia                  |
| KJ669120 | L0a1b1a1a      | Zimbabwe                 |
| KJ669121 | L0a1b1a1       | Namibia                  |
| KJ669122 | L0a2a2a1       | Namibia                  |
| KJ669123 | L0a2a2a1       | Namibia                  |
| KJ669124 | L0d1c1a1a      | Namibia                  |
| KJ669125 | L0d1c3         | Namibia                  |
| KJ669126 | L0d1c3         | Namibia                  |
| KJ669127 | L0d1c1a1b      | Namibia                  |
| KJ669128 | L0d1c2a        | Namibia                  |
| KJ669129 | L0d1c1a1b      | Namibia                  |
| KJ669168 | L0d2d          | Namibia                  |
| KJ669169 | L0d2a1a3       | South Africa             |
| KJ669170 | L0d2a1a        | South Africa             |
| KJ669171 | L0d2a1a2       | South Africa             |
| KJ669172 | L0d2a1a        | Namibia                  |
| KJ669173 | L0d2a1a        | Namibia                  |
| KJ669174 | L0d2a1a        | South Africa             |
| KJ669175 | L0d2a1a2       | Namibia                  |
| KJ669176 | L0d2a1a        | South Africa             |
| KJ669177 | L0d2a1a        | South Africa             |

|          |                 |              |          |                |     |
|----------|-----------------|--------------|----------|----------------|-----|
| KJ669178 | L0d2a1a         | Namibia      | KM101646 | L3d1'2'3'4'5'6 | USA |
| KJ669179 | L0d2a1a         | Namibia      | KM101647 | L3e2a1b        | USA |
| KJ669180 | L0d2a1b         | South Africa | KM101648 | L3e2a1b1       | USA |
| KJ801474 | L3b3            | USA          | KM101649 | L1b1a4         | USA |
| KJ801475 | L3e1f1a         | USA          | KM101650 | L1c2a1a        | USA |
| KJ801477 | L2a1d1          | USA          | KM101651 | L2a1c          | USA |
| KJ801478 | L2a1d1          | USA          | KM101652 | L3b1a4         | USA |
| KJ801479 | L2a1d1          | USA          | KM101653 | L2a1c5         | USA |
| KJ801480 | L2a1d1          | USA          | KM101654 | L3k1           | USA |
| KJ801481 | L2a1a           | USA          | KM101655 | L2a1a1         | USA |
| KJ801482 | L2b2            | USA          | KM101656 | L1b1a6         | USA |
| KJ801483 | L1c3a           | USA          | KM101657 | L2a1c2a        | USA |
| KJ949141 | L2b2a           | USA          | KM101658 | L2a1a          | USA |
| KJ959229 | L3f1b           | Spain        | KM101659 | L3b1a6         | USA |
| KJ959230 | L3f1b           | Spain        | KM101660 | L2c            | USA |
| KM096762 | L2a1k           | Serbia       | KM101661 | L3b3           | USA |
| KM101569 | L1b1a3          | USA          | KM101662 | L0a1b2         | USA |
| KM101570 | L1b1a3          | USA          | KM101663 | L2d1a          | USA |
| KM101571 | L2a1n           | USA          | KM101664 | L2a1f          | USA |
| KM101572 | L3d1b3a         | USA          | KM101665 | L3e3a          | USA |
| KM101573 | L2a1f3          | USA          | KM101707 | L3e2b          | USA |
| KM101576 | L3b1a10         | USA          | KM101708 | L3e1a1a        | USA |
| KM101577 | L2c2b1b         | USA          | KM101709 | L3e3b3         | USA |
| KM101578 | L1c1c           | USA          | KM101711 | L2a1a2         | USA |
| KM101579 | L3e1e           | USA          | KM101712 | L2b2a          | USA |
| KM101580 | L0a2a1b         | USA          | KM101713 | L2a1a2a1a      | USA |
| KM101581 | L2b1b           | USA          | KM101714 | L1b1a          | USA |
| KM101582 | L3b2            | USA          | KM101715 | L3e2b          | USA |
| KM101626 | L2a1b           | USA          | KM101716 | L1c2b1a        | USA |
| KM101627 | L2c             | USA          | KM101717 | L3d1'2'3'4'5'6 | USA |
| KM101628 | L1c5            | USA          | KM101718 | L2c            | USA |
| KM101629 | L3e1            | USA          | KM101719 | L2a1c          | USA |
| KM101630 | L2a1f           | USA          | KM101720 | L2c2a          | USA |
| KM101631 | L3b1a6          | USA          | KM101721 | L2a1c3a1       | USA |
| KM101632 | L1c2b1c         | USA          | KM101722 | L3d1a1a        | USA |
| KM101634 | L3f1b+16292+150 | USA          | KM101724 | L2a1c2         | USA |
| KM101635 | L2a1b+143       | USA          | KM101726 | L1c2a2         | USA |
| KM101636 | L2b2a           | USA          | KM101727 | L2b2           | USA |
| KM101637 | L3d1b2          | USA          | KM101728 | L2a1a1         | USA |
| KM101638 | L3f1b4          | USA          | KM101730 | L3e3b3         | USA |
| KM101639 | L2a1i           | USA          | KM101731 | L1b1a3a        | USA |
| KM101640 | L1b1a3a         | USA          | KM101732 | L3d1d          | USA |
| KM101642 | L2a1a3          | USA          | KM101734 | L3e2b+152      | USA |
| KM101643 | L2a1a2a1a       | USA          | KM101735 | L2a1c4a1       | USA |
| KM101644 | L0a1a2          | USA          | KM101736 | L1b1a4         | USA |
| KM101645 | L3f1b4c         | USA          | KM101866 | L2a1c1         | USA |



|          |                 |                     |
|----------|-----------------|---------------------|
| KM101868 | L2a1l1b         | USA                 |
| KM102043 | L3e4a           | USA                 |
| KM102048 | L1c5            | USA                 |
| KM102058 | L3e2a1b         | USA                 |
| KM102059 | L3e1d1          | USA                 |
| KM102062 | L1b2a           | USA                 |
| KM102081 | L0a2a1a1        | USA                 |
| KM102086 | L1c2b1b         | USA                 |
| KM102090 | L2a1f           | USA                 |
| KM102093 | L2a1l2          | USA                 |
| KM102094 | L3d2b           | USA                 |
| KM102095 | L3e2b           | USA                 |
| KM986577 | L3f2a1a         | Yemen               |
| KM986580 | L0a2a2a         | Yemen               |
| KM986581 | L3b1a11         | Yemen               |
| KM986584 | L3d1a1a         | Yemen               |
| KM986588 | L3d2a           | Yemen               |
| KM986589 | L3h2            | Yemen               |
| KM986590 | L3b1a1a         | Yemen               |
| KM986591 | L3e1a2          | Yemen               |
| KM986592 | L3e3a           | Yemen               |
| KM986593 | L3d1a1a         | Yemen               |
| KM986595 | L3e3a           | Yemen               |
| KM986596 | L3b1a1a         | Yemen               |
| KM986598 | L3b1a1a         | Yemen               |
| KM986599 | L0a2a2a         | Yemen               |
| KM986600 | L3d1a1a         | Yemen               |
| KM986601 | L3d1a1a         | Yemen               |
| KM986604 | L3h2            | Yemen               |
| KM986605 | L3h2            | Yemen               |
| KM986606 | L3h2            | Yemen               |
| KM986608 | L4b2a1          | Yemen               |
| KM986609 | L0a2a2a         | Yemen               |
| KM986614 | L3i2            | Yemen               |
| KM986615 | L3x1+16311      | Yemen               |
| KM986619 | L3d1a1a1        | Yemen               |
| KM986620 | L3x1a1          | Yemen               |
| KM986621 | L3i2            | Yemen               |
| KM986624 | L0a2a2a         | Yemen               |
| KM986627 | L3i2            | Yemen               |
| KP229441 | L3i1            | Unknown             |
| KP229442 | L3i1            | Unknown             |
| KP229443 | L3i1            | Unknown             |
| KP229444 | L3i1            | Unknown             |
| KP229445 | L3i1            | Unknown             |
| KP229446 | L3i1            | Unknown             |
| KP229447 | L3i1            | Unknown             |
| KP229448 | L3i1            | Unknown             |
| KP229449 | L3i1            | Unknown             |
| KP229450 | L3i1a           | Unknown             |
| KP317076 | L4a1a           | Somalia             |
| KP317077 | L6a             | Somalia             |
| KP317078 | L4b2a           | Kenya               |
| KP635236 | L3d1b3          | Unknown             |
| KP635237 | L1c3b1a         | Bolivia             |
| KP635238 | L0a1b2          | Bolivia             |
| KP635239 | L0a1b2          | Bolivia             |
| KP635240 | L1c3b1a         | Bolivia             |
| KP635241 | L3d1a1a         | Unknown             |
| KP635242 | L1c3b1a         | Bolivia             |
| KP635243 | L0a2a2a         | Bolivia             |
| KP875569 | L3f1b1a         | USA                 |
| KP899747 | L2b2            | USA                 |
| KP900753 | L2a1+143        | Brazil              |
| KP900754 | L2a1n           | Brazil              |
| KP900938 | L1b1a15         | Jamaica             |
| KR135841 | L2a1d1          | Somalia             |
| KR135842 | L2a1b1a         | Somalia             |
| KR135843 | L2a1+143+16189  | Somalia             |
| KR135844 | L2a1+143+@16309 | Somalia             |
| KR135845 | L2a1+143+16189  | Somalia             |
| KR135846 | L2a1j           | Somalia             |
| KR135847 | L2a1a           | Somalia             |
| KR135848 | L2a1a2          | Somalia             |
| KR135849 | L2a1+143        | Somalia             |
| KR135850 | L2a1+143+@16309 | Somalia             |
| KR135851 | L2a1+143+@16309 | Somalia             |
| KR135852 | L2a1b1a         | Somalia             |
| KR135853 | L2a1+143        | Sudan               |
| KR135854 | L2a1+143        | Sudan               |
| KR135855 | L2a1d1          | Sudan               |
| KR135856 | L2a1a           | Sudan               |
| KR135857 | L2a2a1          | Sudan               |
| KR135858 | L2d+16129       | Sudan               |
| KR135859 | L2b2            | Sudan               |
| KR135860 | L2a2a           | Sudan               |
| KR135861 | L2e1            | Sudan               |
| KR135862 | L2e1            | São Tomé e Príncipe |
| KT819240 | L2b1a2          | Morocco             |
| KT819241 | L3e5            | Morocco             |
| KT819242 | L3e5a           | Morocco             |
| KT819244 | L1b1a           | Morocco             |

|           |                  |            |
|-----------|------------------|------------|
| KT819245  | L1b1a            | Morocco    |
| KT819246  | L1b1a6           | Morocco    |
| KT819247  | L2a1+143+16189   | Morocco    |
| KT819248  | L2a1c            | Morocco    |
| KT819249  | L3e5a            | Morocco    |
| KT819251  | L1b1a8           | Morocco    |
| KT819252  | L1b1a6           | Morocco    |
| KT819253  | L2a1+143+16189 ( | Morocco    |
| KT819254  | L2a1+143+16189   | Morocco    |
| KT819255  | L2e              | Morocco    |
| KT819256  | L3b1             | Morocco    |
| KT819257  | L3b1a9           | Morocco    |
| KT819258  | L3b1a3           | Morocco    |
| KT819259  | L3b1a5           | Morocco    |
| KT819260  | L3e2b+152        | Morocco    |
| KT819261  | L3e2b1a2         | Morocco    |
| KT819262  | L3e5a            | Morocco    |
| KT819263  | L3e5a1           | Morocco    |
| KU867582  | L3b1a9a          | Unknown    |
| KU867604  | L3b1a9a          | Unknown    |
| KX055476  | L3f1b4a          | USA        |
| KX079703  | L0a1a2           | USA        |
| KX079704  | L3b1a6           | Unknown    |
| KX083678  | L2a1k            | Bulgaria   |
| KY295947  | L2c1             | USA        |
| KY474046  | L3b2a            | USA        |
| KY498629  | L2e1a            | USA        |
| KY797199  | L0a1b            | Lebanon    |
| KY797207  | L3f1b+16292      | Lebanon    |
| LP6008115 | L1b1a+189        | Ireland    |
| LP6008115 | L1b1a8           | Ireland    |
| LP6008116 | L1b1a8           | Ireland    |
| MF039862  | L2a1a1           | Tunisia    |
| MF055825  | L3d1a1a1         | Madagascar |
| MF055830  | L3d1a            | Madagascar |
| MF055832  | L3b1a1a          | Madagascar |
| MF055837  | L0a2a2a          | Madagascar |
| MF055838  | L2a1b1a          | Madagascar |
| MF055845  | L0a1b1a1         | Madagascar |
| MF055846  | L3e1a3a          | Madagascar |
| MF055847  | L3e3a            | Madagascar |
| MF055849  | L3e3a            | Madagascar |
| MF055850  | L0a1b1a1         | Madagascar |
| MF055853  | L2a1b1a          | Madagascar |
| MF055856  | L2b1a3           | Madagascar |
| MF055857  | L2a1b1a          | Madagascar |
| MF055858  | L0a2a2a          | Madagascar |
| MF055859  | L2a1b1a          | Madagascar |
| MF055860  | L0a1b1a1         | Madagascar |
| MF055864  | L3e3a            | Madagascar |
| MF055867  | L1c3a            | Madagascar |
| MF055870  | L2a1a2           | Madagascar |
| MF055871  | L2a1a2           | Madagascar |
| MF055874  | L2a1a2           | Madagascar |
| MF055876  | L2a1a2           | Madagascar |
| MF055879  | L0a2a2a          | Madagascar |
| MF055882  | L3d1a1a1         | Madagascar |
| MF055886  | L3e3b1           | Madagascar |
| MF055889  | L2a1a2           | Madagascar |
| MF055890  | L3e1d1           | Madagascar |
| MF055891  | L3f1b4a1         | Madagascar |
| MF055892  | L3d1a1a1         | Madagascar |
| MF055895  | L2a1b1a          | Madagascar |
| MF055896  | L1b2a            | Madagascar |
| MF055898  | L1b2a            | Madagascar |
| MF055900  | L3e1a3a          | Madagascar |
| MF055910  | L0a1b1a1         | Madagascar |
| MF055911  | L3d1a1a1         | Madagascar |
| MF055912  | L3b1a1a          | Madagascar |
| MF055914  | L2a1b1a          | Madagascar |
| MF055917  | L0a2a2a          | Madagascar |
| MF056016  | L2a1b1a          | Madagascar |
| MF056018  | L3b1a1a          | Madagascar |
| MF056019  | L2a1b1a          | Madagascar |
| MF056021  | L3e1a3a          | Madagascar |
| MF056024  | L0a1b1a1         | Madagascar |
| MF056026  | L3b1a1a          | Madagascar |
| MF056027  | L0a2a2a          | Madagascar |
| MF056028  | L3b1a1a          | Madagascar |
| MF056040  | L3e3b1           | Madagascar |
| MF056041  | L2a1b1a          | Madagascar |
| MF056045  | L2a1b1a          | Madagascar |
| MF056047  | L3e1a3a          | Madagascar |
| MF056050  | L3b1a1a          | Madagascar |
| MF056051  | L3b1a1a          | Madagascar |
| MF056055  | L2a1a2           | Madagascar |
| MF056073  | L3b1a1a          | Madagascar |
| MF056075  | L2a1b1a          | Madagascar |
| MF056078  | L3b1a1a          | Madagascar |
| MF056087  | L1c3a            | Madagascar |
| MF056088  | L3b1a1a          | Madagascar |
| MF056089  | L3d1a1a1         | Madagascar |

|          |          |            |
|----------|----------|------------|
| MF056091 | L3b1a1a  | Madagascar |
| MF056097 | L3b1a1a  | Madagascar |
| MF056099 | L2a1b1a  | Madagascar |
| MF056100 | L2a1b1a  | Madagascar |
| MF056104 | L2a1c    | Madagascar |
| MF056110 | L0a2a2a  | Madagascar |
| MF056118 | L3e3b1   | Madagascar |
| MF056120 | L3f1b4a  | Madagascar |
| MF056121 | L3b1a1a  | Madagascar |
| MF056122 | L1c3a    | Madagascar |
| MF056123 | L3b1a1a  | Madagascar |
| MF056125 | L3e3b1   | Madagascar |
| MF056126 | L3e1a1a  | Madagascar |
| MF056128 | L0a2a2a  | Madagascar |
| MF056129 | L0a1b1a1 | Madagascar |
| MF056130 | L3e1     | Madagascar |
| MF056131 | L0a1a2   | Madagascar |
| MF056258 | L3e1a3a  | Madagascar |
| MF056260 | L3b1a1a  | Madagascar |
| MF056261 | L3b1a1a  | Madagascar |
| MF056272 | L3e1a1a  | Madagascar |
| MF056274 | L3e1a3a  | Madagascar |
| MF056276 | L3d1a1a1 | Madagascar |
| MF056277 | L2a1a2   | Madagascar |
| MF056278 | L3e1a3a  | Madagascar |
| MF056280 | L0a2a2a  | Madagascar |
| MF056281 | L1c3c    | Madagascar |
| MF056285 | L2a1a2   | Madagascar |
| MF056286 | L3e1e1   | Madagascar |
| MF056287 | L2a1a2   | Madagascar |
| MF056288 | L3b1a1a  | Madagascar |
| MF056289 | L2a1b1a  | Madagascar |
| MF056290 | L3b1a1a  | Madagascar |
| MF056292 | L1c3c    | Madagascar |
| MF056293 | L2a1b1a  | Madagascar |
| MF056296 | L3e3b1   | Madagascar |
| MF056297 | L3b1a1a  | Madagascar |
| MF056298 | L3b1a1a  | Madagascar |
| MF056299 | L3e3b1   | Madagascar |
| MF056305 | L2a1a2   | Madagascar |
| MF056313 | L1c1d    | Madagascar |
| MF056317 | L3e1a3a  | Madagascar |
| MF056318 | L3b1a1a  | Madagascar |
| MF056321 | L3e1a3a  | Madagascar |
| MF056324 | L3b1a1a  | Madagascar |
| MF056325 | L3b1a1a  | Madagascar |

|          |            |            |
|----------|------------|------------|
| MF056328 | L0a1b1a1   | Madagascar |
| MF056330 | L3e3b1     | Madagascar |
| MF056333 | L1b1a+189  | Madagascar |
| MF056334 | L2a1f      | Madagascar |
| MF056335 | L1c3a1b    | Madagascar |
| MF056336 | L2a1f      | Madagascar |
| MF056337 | L3b1a1a    | Madagascar |
| MF056338 | L2a1b1a    | Madagascar |
| MF056341 | L3e3a      | Madagascar |
| MF056419 | L3d1a1a1   | Madagascar |
| MF056421 | L3e3a      | Madagascar |
| MF056422 | L3e3a      | Madagascar |
| MF056427 | L3d1a1a1   | Madagascar |
| MF056428 | L2a1b1a    | Madagascar |
| MF056430 | L3b1a1a    | Madagascar |
| MF056431 | L3e3a      | Madagascar |
| MF056432 | L3b1a1a    | Madagascar |
| MF056434 | L3d1a1a1   | Madagascar |
| MF056435 | L0a2a1a    | Madagascar |
| MF056436 | L3b1a3     | Madagascar |
| MF056437 | L3d1a1a1   | Madagascar |
| MF056438 | L3b1a1a    | Madagascar |
| MF056439 | L0a1+16293 | Madagascar |
| MF056441 | L3e1e1     | Madagascar |
| MF056444 | L0a2       | Madagascar |
| MF056446 | L3e3a      | Madagascar |
| MF056452 | L0a2a1a    | Madagascar |
| MF056453 | L3e1a3a    | Madagascar |
| MF056456 | L2a1b1a    | Madagascar |
| MF056461 | L3e3a      | Madagascar |
| MF056463 | L1c3c      | Madagascar |
| MF056464 | L2a1b1a    | Madagascar |
| MF056465 | L0a2a1a    | Madagascar |
| MF056466 | L3d1a1a    | Madagascar |
| MF056470 | L3d1a1a    | Madagascar |
| MF056476 | L2a1b1a    | Madagascar |
| MF056483 | L3d1a1a1   | Madagascar |
| MF056484 | L2a1b1a    | Madagascar |
| MF056486 | L3d1a1a1   | Madagascar |
| MF056488 | L1c3c      | Madagascar |
| MF056489 | L3e2b      | Madagascar |
| MF056494 | L3e1a3a    | Madagascar |
| MF056496 | L3b1a1a    | Madagascar |
| MF056498 | L3b1a1a    | Madagascar |
| MF056503 | L3b1a1a    | Madagascar |
| MF056506 | L3e1b2     | Madagascar |

|          |           |            |
|----------|-----------|------------|
| MF056511 | L3e1d1    | Madagascar |
| MF056596 | L2a1b1a   | Madagascar |
| MF056597 | L3e1a3a   | Madagascar |
| MF056598 | L2a1b1a   | Madagascar |
| MF056601 | L3k1      | Madagascar |
| MF056604 | L2a1b1a   | Madagascar |
| MF056605 | L3k1      | Madagascar |
| MF056606 | L4b1a     | Madagascar |
| MF056608 | L4b1a     | Madagascar |
| MF056609 | L3k1      | Madagascar |
| MF056610 | L2a1b1a   | Madagascar |
| MF056611 | L2a1b1a   | Madagascar |
| MF056615 | L3e3b1    | Madagascar |
| MF056618 | L3d1a1a   | Madagascar |
| MF056619 | L2a1b1a   | Madagascar |
| MF056620 | L3b1a1a   | Madagascar |
| MF056622 | L2a1a     | Madagascar |
| MF056624 | L3e3b1    | Madagascar |
| MF056627 | L0a2a2a   | Madagascar |
| MF056631 | L2a1b1a   | Madagascar |
| MF056632 | L2a1f     | Madagascar |
| MF056633 | L3e3b1    | Madagascar |
| MF056635 | L3b1a1a   | Madagascar |
| MF056638 | L3e3a     | Madagascar |
| MF056643 | L3e3b1    | Madagascar |
| MF056644 | L2b1a3    | Madagascar |
| MF056647 | L3b1a1a   | Madagascar |
| MF056651 | L3b1a1a   | Madagascar |
| MF056665 | L2a1b1a   | Madagascar |
| MF056669 | L3b1a8    | Madagascar |
| MF056672 | L3e1a3a   | Madagascar |
| MF056673 | L1c3a     | Madagascar |
| MF056678 | L3b1a3    | Madagascar |
| MF056680 | L3b1a1a   | Madagascar |
| MF056681 | L3e2b+152 | Madagascar |
| MF056686 | L2a1b1a   | Madagascar |
| MF056688 | L4b1a     | Madagascar |
| MF056700 | L3e2b+152 | Madagascar |
| MF056701 | L3b1a1a   | Madagascar |
| MF056824 | L2a1b1a   | Madagascar |
| MF056825 | L3f1b4a1  | Madagascar |
| MF056828 | L3d1a1a   | Madagascar |
| MF056829 | L0a2a2a   | Madagascar |
| MF056830 | L0a2a2a   | Madagascar |
| MF056831 | L3b1a1a   | Madagascar |
| MF056832 | L3e1a3a   | Madagascar |

|          |          |            |
|----------|----------|------------|
| MF056833 | L3k1     | Madagascar |
| MF056835 | L3b1a1a  | Madagascar |
| MF056837 | L0a2a2a  | Madagascar |
| MF056838 | L3e1a3a  | Madagascar |
| MF056839 | L3k1     | Madagascar |
| MF056840 | L1b1a    | Madagascar |
| MF056841 | L3d1a1a  | Madagascar |
| MF056842 | L3e3a    | Madagascar |
| MF056843 | L3b1a8   | Madagascar |
| MF056844 | L3d1a    | Madagascar |
| MF056845 | L3b1a1a  | Madagascar |
| MF056849 | L3b1a1a  | Madagascar |
| MF056850 | L3b1a1a  | Madagascar |
| MF056862 | L3b1a1a  | Madagascar |
| MF056874 | L2a1f    | Madagascar |
| MF056877 | L2a1b1a  | Madagascar |
| MF056878 | L3f1b4a1 | Madagascar |
| MF056879 | L2a1b1a  | Madagascar |
| MF056881 | L3b1a1a  | Madagascar |
| MF056883 | L2a1f    | Madagascar |
| MF056886 | L3e1b2   | Madagascar |
| MF056888 | L3b1a1a  | Madagascar |
| MF056893 | L0a2a2a  | Madagascar |
| MF056896 | L3e3a    | Madagascar |
| MF056903 | L3e1b2   | Madagascar |
| MF056904 | L2a1b1a  | Madagascar |
| MF056914 | L2a1a2   | Madagascar |
| MF056915 | L3e1a3a  | Madagascar |
| MF056916 | L3b1a1a  | Madagascar |
| MF056925 | L3e1a3a  | Madagascar |
| MF056927 | L3e1a3a  | Madagascar |
| MF057033 | L3e3b    | Madagascar |
| MF057037 | L0a1b1a1 | Madagascar |
| MF057040 | L3f1b4a1 | Madagascar |
| MF057042 | L3f1b4a1 | Madagascar |
| MF057043 | L2a1b1a  | Madagascar |
| MF057048 | L2a1a2   | Madagascar |
| MF057051 | L3b1a1a  | Madagascar |
| MF057052 | L3b1a1a  | Madagascar |
| MF057053 | L2a1b1a  | Madagascar |
| MF057055 | L2a1a2   | Madagascar |
| MF057056 | L3k1     | Madagascar |
| MF057072 | L2a1a2   | Madagascar |
| MF057073 | L3e3b1   | Madagascar |
| MF057085 | L0a2a1b  | Madagascar |
| MF057088 | L3e1a1a  | Madagascar |

|          |           |            |
|----------|-----------|------------|
| MF057093 | L3e1      | Madagascar |
| MF057096 | L2a1b1a   | Madagascar |
| MF057097 | L3b1a1a   | Madagascar |
| MF057098 | L3b1a1a   | Madagascar |
| MF057099 | L3e3a     | Madagascar |
| MF057103 | L2a1b1a   | Madagascar |
| MF057105 | L3e1a1a   | Madagascar |
| MF057106 | L3b1a1a   | Madagascar |
| MF057107 | L3b1a1a   | Madagascar |
| MF057109 | L3d1a1a1  | Madagascar |
| MF057111 | L3b1a1a   | Madagascar |
| MF057113 | L3e3b1    | Madagascar |
| MF057119 | L3b1a8    | Madagascar |
| MF057121 | L0a2a2a   | Madagascar |
| MF057122 | L2a1b1a   | Madagascar |
| MF057124 | L0a2a2a   | Madagascar |
| MF057125 | L3b1a1a   | Madagascar |
| MF057126 | L2a1b1a   | Madagascar |
| MF057127 | L2a1b1a   | Madagascar |
| MF057128 | L2a1a2    | Madagascar |
| MF057129 | L2a1b1a   | Madagascar |
| MF057130 | L3d1a1a1  | Madagascar |
| MF057132 | L3e1a1a   | Madagascar |
| MF057198 | L2a1b1a   | Madagascar |
| MF057199 | L0a2a2a   | Madagascar |
| MF057200 | L3b1a1a   | Madagascar |
| MF057203 | L0a2a2a   | Madagascar |
| MF057204 | L3e1a1a   | Madagascar |
| MF057205 | L3e1a1a   | Madagascar |
| MF057206 | L3e1a1a   | Madagascar |
| MF057209 | L3d1a1a1  | Madagascar |
| MF057210 | L3d1a1a   | Madagascar |
| MF057211 | L3b1a1a   | Madagascar |
| MF057213 | L3b1a1a   | Madagascar |
| MF057217 | L2d1a     | Madagascar |
| MF057218 | L3e2b+152 | Madagascar |
| MF057225 | L2a1b1a   | Madagascar |
| MF057228 | L3e1d1    | Madagascar |
| MF057232 | L2a1b1a   | Madagascar |
| MF057233 | L1c1d     | Madagascar |
| MF057235 | L2a1b1a   | Madagascar |
| MF057238 | L2a1b1a   | Madagascar |
| MF057239 | L0a2a2a   | Madagascar |
| MF057241 | L0a1a2    | Madagascar |
| MF057242 | L2a1b1a   | Madagascar |
| MF057245 | L0a1b1a1  | Madagascar |
| MF057246 | L2a1a2    | Madagascar |
| MF057247 | L3e2b+152 | Madagascar |
| MF057250 | L3f1b4a1  | Madagascar |
| MF057251 | L3f       | Madagascar |
| MF057252 | L2a1a2    | Madagascar |
| MF057253 | L0a2a2a   | Madagascar |
| MF057254 | L3a+709   | Madagascar |
| MF057255 | L3a+709   | Madagascar |
| MF057256 | L3a+709   | Madagascar |
| MF057258 | L2a1b1a   | Madagascar |
| MF057261 | L3a+709   | Madagascar |
| MF057266 | L2a1a2    | Madagascar |
| MF057268 | L2a1b1a   | Madagascar |
| MF057269 | L3b1a3    | Madagascar |
| MF057274 | L2a5      | Madagascar |
| MF057367 | L3e3a     | Madagascar |
| MF057369 | L3b1a1a   | Madagascar |
| MF057372 | L0a2a2a   | Madagascar |
| MF057373 | L3e3b1    | Madagascar |
| MF057376 | L2a1b1a   | Madagascar |
| MF057377 | L2a1b1a   | Madagascar |
| MF057379 | L2b1a3    | Madagascar |
| MF057380 | L3e1a3a   | Madagascar |
| MF057383 | L0a2a2a   | Madagascar |
| MF057385 | L3e3a     | Madagascar |
| MF057386 | L3b1a1a   | Madagascar |
| MF057387 | L3e3a     | Madagascar |
| MF057393 | L3b1a1a   | Madagascar |
| MF057396 | L3a+709   | Madagascar |
| MF057399 | L3e3b1    | Madagascar |
| MF057400 | L3e1a3a   | Madagascar |
| MF057403 | L3e3b1    | Madagascar |
| MF057404 | L3b1a1a   | Madagascar |
| MF057405 | L3e3a     | Madagascar |
| MF057406 | L2a1b1a   | Madagascar |
| MF057407 | L3b1a1a   | Madagascar |
| MF057412 | L0a2a2a   | Madagascar |
| MF057413 | L3e1a3a   | Madagascar |
| MF057418 | L2a1b1a   | Madagascar |
| MF057420 | L0a2a2a   | Madagascar |
| MF057422 | L3k1      | Madagascar |
| MF057424 | L0a2a2a   | Madagascar |
| MF057425 | L3e1a3a   | Madagascar |
| MF057428 | L0a2a2a   | Madagascar |
| MF057430 | L2a1b1a   | Madagascar |
| MF057431 | L1c3a     | Madagascar |

|          |           |            |
|----------|-----------|------------|
| MF057432 | L0a2a2a   | Madagascar |
| MF057434 | L3b1a1a   | Madagascar |
| MF057435 | L3e1a3a   | Madagascar |
| MF057436 | L3b1a1a   | Madagascar |
| MF057437 | L3e3a     | Madagascar |
| MF057443 | L3e1d1    | Madagascar |
| MF057444 | L1c3b1a   | Madagascar |
| MF057523 | L2a1b1a   | Madagascar |
| MF057526 | L0a1b1a1  | Madagascar |
| MF057527 | L1c3c     | Madagascar |
| MF057528 | L3b1a1a   | Madagascar |
| MF057529 | L2a1b1a   | Madagascar |
| MF057532 | L2a1b1a   | Madagascar |
| MF057535 | L3e2b+152 | Madagascar |
| MF057540 | L3b1a1a   | Madagascar |
| MF057542 | L3d1a1a   | Madagascar |
| MF057544 | L0a2a2a   | Madagascar |
| MF057545 | L1c1d     | Madagascar |
| MF057550 | L3f1b4a   | Madagascar |
| MF057553 | L4b2a     | Madagascar |
| MF057554 | L0a1b1a1  | Madagascar |
| MF057555 | L3b1a1a   | Madagascar |
| MF057559 | L3e2b+152 | Madagascar |
| MF057561 | L3b1a1a   | Madagascar |
| MF057563 | L3e1a3a   | Madagascar |
| MF057566 | L2a1b1a   | Madagascar |
| MF057572 | L2a1b1a   | Madagascar |
| MF057573 | L2a1b1a   | Madagascar |
| MF057574 | L0a2a2a   | Madagascar |
| MF057583 | L0a1b1a1  | Madagascar |
| MF057586 | L2a1b1a   | Madagascar |
| MF057587 | L2a1b1a   | Madagascar |
| MF057590 | L3b1a1a   | Madagascar |
| MF057591 | L3d1a1a1  | Madagascar |
| MF057592 | L3e3b1    | Madagascar |
| MF057598 | L2a1a2    | Madagascar |
| MF057599 | L3b1a1a   | Madagascar |
| MF057600 | L3d1a1a   | Madagascar |
| MF057605 | L2a1a2a1a | Madagascar |
| MF057607 | L3b1a1a   | Madagascar |
| MF057617 | L3d1a1a   | Madagascar |
| MF057620 | L3e3a     | Madagascar |
| MF057622 | L3e2b     | Madagascar |
| MF057623 | L3f1b4a   | Madagascar |
| MF057629 | L3b1a1a   | Madagascar |
| MF057723 | L3e1a3a   | Madagascar |

|          |          |            |
|----------|----------|------------|
| MF057724 | L3e3a    | Madagascar |
| MF057725 | L0a2a2a  | Madagascar |
| MF057726 | L3e3a    | Madagascar |
| MF057728 | L3e1a3a  | Madagascar |
| MF057729 | L3e1a3a  | Madagascar |
| MF057731 | L3e1a3a  | Madagascar |
| MF057736 | L3e3a    | Madagascar |
| MF057738 | L0a2a2a  | Madagascar |
| MF057740 | L3b1a1a  | Madagascar |
| MF057741 | L2a1b1a  | Madagascar |
| MF057745 | L2a1b1a  | Madagascar |
| MF057747 | L2a1f    | Madagascar |
| MF057750 | L3b2     | Madagascar |
| MF057753 | L3b2     | Madagascar |
| MF057754 | L3e1a3a  | Madagascar |
| MF057762 | L2a1a2   | Madagascar |
| MF057763 | L3b1a1a  | Madagascar |
| MF057766 | L3b1a1a  | Madagascar |
| MF057769 | L3e3a    | Madagascar |
| MF057773 | L3b1a1a  | Madagascar |
| MF057783 | L3b1a1a  | Madagascar |
| MF057785 | L3b1a1a  | Madagascar |
| MF057786 | L3b1a1a  | Madagascar |
| MF057787 | L3d1a1a1 | Madagascar |
| MF057788 | L3b1a1a  | Madagascar |
| MF057790 | L2a1b1a  | Madagascar |
| MF057793 | L3e1a3a  | Madagascar |
| MF057794 | L2b1a3   | Madagascar |
| MF057796 | L0a1e    | Madagascar |
| MF057798 | L1c3c    | Madagascar |
| MF057799 | L3b1a1a  | Madagascar |
| MF057801 | L3b1a1a  | Madagascar |
| MF057803 | L3b1a1a  | Madagascar |
| MF057808 | L2a1b1a  | Madagascar |
| MF057809 | L3d1a1a1 | Madagascar |
| MF057811 | L0a1b1a1 | Madagascar |
| MF057813 | L3e3b1   | Madagascar |
| MF057894 | L2a1h    | Madagascar |
| MF057903 | L1c3c    | Madagascar |
| MF057905 | L4b1a    | Madagascar |
| MF057908 | L3e1     | Madagascar |
| MF057910 | L3d1a1a1 | Madagascar |
| MF057911 | L3e1a3a  | Madagascar |
| MF057914 | L3d1a1a1 | Madagascar |
| MF057915 | L2a1b1a  | Madagascar |
| MF057916 | L0a2a2a  | Madagascar |

|          |          |            |
|----------|----------|------------|
| MF057918 | L3b1a1a  | Madagascar |
| MF057920 | L3d1a1a1 | Madagascar |
| MF057921 | L3d1a1a1 | Madagascar |
| MF057922 | L3d1a1a1 | Madagascar |
| MF057927 | L2a1f    | Madagascar |
| MF057928 | L3b1a1a  | Madagascar |
| MF057929 | L3e1d1   | Madagascar |
| MF057933 | L0a2a1b  | Madagascar |
| MF057934 | L3f1b4a1 | Madagascar |
| MF057935 | L3d1a1a  | Madagascar |
| MF057937 | L3e3a    | Madagascar |
| MF057938 | L2a1b1a  | Madagascar |
| MF057940 | L2a1b1a  | Madagascar |
| MF057943 | L2a1a2   | Madagascar |
| MF057946 | L0a2a2a  | Madagascar |
| MF057947 | L2a1a2   | Madagascar |
| MF057948 | L2a1a2   | Madagascar |
| MF057951 | L0a2a2a  | Madagascar |
| MF057955 | L0a2a2a  | Madagascar |
| MF057956 | L1c3a    | Madagascar |
| MF057959 | L3e1     | Madagascar |
| MF057960 | L3e1a1a  | Madagascar |
| MF057961 | L3f1b4a1 | Madagascar |
| MF057967 | L2a1a2   | Madagascar |
| MF057968 | L2a1f    | Madagascar |
| MF057973 | L3e1a3a  | Madagascar |
| MF057978 | L2a1b1a  | Madagascar |
| MF057979 | L3e1a3a  | Madagascar |
| MF057980 | L2a1a    | Madagascar |
| MF058082 | L3e3a    | Madagascar |
| MF058085 | L2a1a    | Madagascar |
| MF058087 | L3b1a1a  | Madagascar |
| MF058088 | L2a1a    | Madagascar |
| MF058090 | L3d1a1a1 | Madagascar |
| MF058091 | L1c3a    | Madagascar |
| MF058092 | L3b1a1a  | Madagascar |
| MF058093 | L3b1a1a  | Madagascar |
| MF058094 | L1c3a1a  | Madagascar |
| MF058095 | L2a1a    | Madagascar |
| MF058096 | L0a2a2a  | Madagascar |
| MF058097 | L2a1b1a  | Madagascar |
| MF058098 | L1c2a1a  | Madagascar |
| MF058099 | L2a1b1a  | Madagascar |
| MF058100 | L0a1b1a1 | Madagascar |
| MF058101 | L0a1b1a1 | Madagascar |
| MF058102 | L0a1b1a1 | Madagascar |

|          |            |            |
|----------|------------|------------|
| MF058103 | L0f        | Madagascar |
| MF058104 | L3e1a3a    | Madagascar |
| MF058105 | L3e2b      | Madagascar |
| MF058106 | L2c2b1b    | Madagascar |
| MF058107 | L3d1a1a    | Madagascar |
| MF058108 | L1c2a1a    | Madagascar |
| MF058110 | L0a2a2a    | Madagascar |
| MF058112 | L2c2b1b    | Madagascar |
| MF058113 | L0a2       | Madagascar |
| MF058115 | L3e1a3a    | Madagascar |
| MF058116 | L0a2       | Madagascar |
| MF058117 | L3e3a      | Madagascar |
| MF058118 | L2a1b1a    | Madagascar |
| MF058119 | L0a2       | Madagascar |
| MF058122 | L0a2d      | Madagascar |
| MF058123 | L3d3a1     | Madagascar |
| MF058124 | L0a2a1b    | Madagascar |
| MF058125 | L1c2b1b    | Madagascar |
| MF058126 | L0a1'4     | Madagascar |
| MF058127 | L2a1b1a    | Madagascar |
| MF058137 | L3d1a1a1   | Madagascar |
| MF058196 | L0a1a2     | Madagascar |
| MF058197 | L0a1+16293 | Madagascar |
| MF058198 | L2b2a      | Madagascar |
| MF058199 | L3e3a      | Madagascar |
| MF058200 | L3e3a      | Madagascar |
| MF058203 | L0a2a2a    | Madagascar |
| MF058204 | L3b1a1a    | Madagascar |
| MF058205 | L0a2a2a    | Madagascar |
| MF058206 | L3e1a3a    | Madagascar |
| MF058207 | L0a2a2a    | Madagascar |
| MF058209 | L0a2a2a    | Madagascar |
| MF058210 | L1b2a      | Madagascar |
| MF058212 | L3e1       | Madagascar |
| MF058216 | L1c1       | Madagascar |
| MF058217 | L0a1b1a1   | Madagascar |
| MF058219 | L3e1a1a    | Madagascar |
| MF058222 | L3e3b1     | Madagascar |
| MF058223 | L2a1a2a1a  | Madagascar |
| MF058224 | L0a2a2a    | Madagascar |
| MF058225 | L0a2a1a2   | Madagascar |
| MF058227 | L3b1a1a    | Madagascar |
| MF058233 | L2a5       | Madagascar |
| MF058234 | L3b1a1a    | Madagascar |
| MF058235 | L4b1a      | Madagascar |
| MF058237 | L4b2a      | Madagascar |



|          |              |            |
|----------|--------------|------------|
| MF058238 | L3b1a1a      | Madagascar |
| MF058241 | L2a1b1a      | Madagascar |
| MF058243 | L3e1d1       | Madagascar |
| MF058245 | L4b1a        | Madagascar |
| MF058246 | L2a1b1a      | Madagascar |
| MF058249 | L3b1a+@16124 | Madagascar |
| MF058251 | L3d1a1a      | Madagascar |
| MF058257 | L3b1a1a      | Madagascar |
| MF058259 | L3b1a1a      | Madagascar |
| MF058260 | L3b1a1a      | Madagascar |
| MF058261 | L2a1b1a      | Madagascar |
| MF058264 | L3a1         | Madagascar |
| MF058272 | L3b1a1a      | Madagascar |
| MF058385 | L3e1a1a      | Madagascar |
| MF058387 | L0a1b1a1     | Madagascar |
| MF058389 | L2a1b1a      | Madagascar |
| MF058392 | L3e2b+152    | Madagascar |
| MF058393 | L0a2a2a      | Madagascar |
| MF058394 | L0a2a2a      | Madagascar |
| MF058396 | L2a1b1a      | Madagascar |
| MF058397 | L0a2a2a      | Madagascar |
| MF058398 | L3e3a        | Madagascar |
| MF058399 | L3d1a1a      | Madagascar |
| MF058400 | L3d1a1a      | Madagascar |
| MF058401 | L3b1a1a      | Madagascar |
| MF058409 | L0a2a2a      | Madagascar |
| MF058411 | L3f1b1a1     | Madagascar |
| MF058413 | L3e1a1a      | Madagascar |
| MF058414 | L1c2a1a      | Madagascar |
| MF058417 | L0a2a2a      | Madagascar |
| MF058419 | L0d1c        | Madagascar |
| MF058421 | L3e2b1a2     | Madagascar |
| MF058422 | L1c3b1a      | Madagascar |
| MF058424 | L3d1a1a1     | Madagascar |
| MF058427 | L0a1b1a1     | Madagascar |
| MF058430 | L2a1b1a      | Madagascar |
| MF058431 | L0a          | Madagascar |
| MF058432 | L3e3a        | Madagascar |
| MF058433 | L3e3a        | Madagascar |
| MF058434 | L3e3a        | Madagascar |
| MF058435 | L1c3c        | Madagascar |
| MF058438 | L3e3b        | Madagascar |
| MF058441 | L2a5         | Madagascar |
| MF058445 | L0a2a2a      | Madagascar |
| MF058449 | L2a1a2       | Madagascar |
| MF058454 | L0a1b1a1a    | Madagascar |

|          |             |            |
|----------|-------------|------------|
| MF058458 | L3e3b1      | Madagascar |
| MF058460 | L3b1a1a     | Madagascar |
| MF058467 | L3b1a1a     | Madagascar |
| MF058469 | L2a5        | Madagascar |
| MF058471 | L3b1a1a     | Madagascar |
| MF058564 | L2a1f       | Madagascar |
| MF058565 | L3b1a11     | Madagascar |
| MF058566 | L3e3a       | Madagascar |
| MF058568 | L3f2a1      | Madagascar |
| MF058571 | L3f1b1a     | Madagascar |
| MF058578 | L3b1a1a     | Madagascar |
| MF058579 | L0f         | Madagascar |
| MF058581 | L3b1a1a     | Madagascar |
| MF058582 | L3e1d1      | Madagascar |
| MF058587 | L3e3b1      | Madagascar |
| MF058588 | L0a2a2a     | Madagascar |
| MF058590 | L3e1a1a     | Madagascar |
| MF058591 | L2a1f       | Madagascar |
| MF058593 | L3b1a1a     | Madagascar |
| MF058597 | L0a2a2a     | Madagascar |
| MF362754 | L0a         | Armenia    |
| MF381287 | L0a1b2      | Angola     |
| MF381288 | L3f1b4a     | Angola     |
| MF381289 | L3e1a2      | Angola     |
| MF381290 | L0d1c3      | Angola     |
| MF381291 | L0d1c3      | Angola     |
| MF381292 | L0a1b1      | Angola     |
| MF381293 | L0a1b1      | Angola     |
| MF381294 | L3f1b4a     | Angola     |
| MF381295 | L3f1b4a     | Angola     |
| MF381296 | L0a1b1      | Angola     |
| MF381297 | L1c1b       | Angola     |
| MF381298 | L1c1b       | Angola     |
| MF381299 | L0d1b1+@152 | Angola     |
| MF381300 | L0a1b1      | Angola     |
| MF381301 | L0a1b1      | Angola     |
| MF381302 | L0a2a1b     | Angola     |
| MF381303 | L0a1b2      | Angola     |
| MF381304 | L3e1a2      | Angola     |
| MF381305 | L0a1b1      | Angola     |
| MF381306 | L3f1b4a     | Angola     |
| MF381307 | L3f1b4a     | Angola     |
| MF381308 | L1c1b       | Angola     |
| MF381347 | L1c3a1b     | Angola     |
| MF381348 | L3e1a3a     | Angola     |
| MF381349 | L3f1b1a     | Angola     |

|          |           |        |
|----------|-----------|--------|
| MF381350 | L2c2b1b   | Angola |
| MF381351 | L3f1b4a   | Angola |
| MF381352 | L3f1b4a   | Angola |
| MF381353 | L1c2b1a'b | Angola |
| MF381354 | L3e1a3a   | Angola |
| MF381355 | L1c2b1a'b | Angola |
| MF381356 | L3e1a2    | Angola |
| MF381357 | L3e1e1    | Angola |
| MF381358 | L3f1b4a   | Angola |
| MF381359 | L3e1a2    | Angola |
| MF381360 | L1c1b     | Angola |
| MF381361 | L3e1a2    | Angola |
| MF381362 | L3f1b4a   | Angola |
| MF381363 | L3f1b4a   | Angola |
| MF381364 | L3d3a1a   | Angola |
| MF381365 | L3f1b4a   | Angola |
| MF381366 | L3f1b4a   | Angola |
| MF381367 | L3f1b4a   | Angola |
| MF381368 | L3f1b4a   | Angola |
| MF381369 | L0d1a1b1a | Angola |
| MF381370 | L0a1b1    | Angola |
| MF381371 | L3f1b4a   | Angola |
| MF381372 | L0a1b1    | Angola |
| MF381373 | L0a1b1    | Angola |
| MF381374 | L1c1b     | Angola |
| MF381375 | L1c1b     | Angola |
| MF381376 | L0a1b1    | Angola |
| MF381377 | L0a2a1b   | Angola |
| MF381378 | L1c1b     | Angola |
| MF381379 | L0a1b1    | Angola |
| MF381380 | L0a1b1    | Angola |
| MF381381 | L1c1b     | Angola |
| MF381382 | L0a1b1    | Angola |
| MF381383 | L1c1b     | Angola |
| MF381384 | L3f1b4a   | Angola |
| MF381423 | L3f1b4a   | Angola |
| MF381424 | L3f1b4a   | Angola |
| MF381425 | L1c1b     | Angola |
| MF381426 | L3f1b4a   | Angola |
| MF381427 | L3f1b4a   | Angola |
| MF381428 | L1c1b     | Angola |
| MF381429 | L0a1b1    | Angola |
| MF381430 | L3f1b4a   | Angola |
| MF381431 | L3f1b4a   | Angola |
| MF381432 | L3f1b4a   | Angola |
| MF381433 | L1c1b     | Angola |

|          |           |        |
|----------|-----------|--------|
| MF381434 | L3f1b4a   | Angola |
| MF381435 | L3e1a2    | Angola |
| MF381436 | L3e1a2    | Angola |
| MF381437 | L0a1b2    | Angola |
| MF381438 | L3e2b     | Angola |
| MF381439 | L3f1b4a   | Angola |
| MF381440 | L3e1a2    | Angola |
| MF381441 | L3f1b4a   | Angola |
| MF381442 | L3e2b     | Angola |
| MF381443 | L3e1a2    | Angola |
| MF381444 | L3d3a1a   | Angola |
| MF381445 | L3d3a1a   | Angola |
| MF381446 | L0a1b2    | Angola |
| MF381447 | L0a1b2    | Angola |
| MF381448 | L3f1b4a   | Angola |
| MF381449 | L1c1b     | Angola |
| MF381450 | L0a1b1    | Angola |
| MF381451 | L3e1a2    | Angola |
| MF381452 | L3e1a2    | Angola |
| MF381453 | L0a2a1b   | Angola |
| MF381454 | L0a1b1    | Angola |
| MF381455 | L0a2a1b   | Angola |
| MF381456 | L0a1b1    | Angola |
| MF381457 | L3f1b4a   | Angola |
| MF381458 | L0a2a1b   | Angola |
| MF381459 | L0a2a1b   | Angola |
| MF381460 | L1c1b     | Angola |
| MF381499 | L0d1b1b1  | Angola |
| MF381500 | L0d1a1b1a | Angola |
| MF381501 | L2c3      | Angola |
| MF381502 | L0d1a1b1a | Angola |
| MF381503 | L0d1a1b1a | Angola |
| MF381504 | L0d1a1b1a | Angola |
| MF381505 | L1c1b     | Angola |
| MF381506 | L0d1b1b1  | Angola |
| MF381507 | L0a1b2    | Angola |
| MF381508 | L0a1b2    | Angola |
| MF381509 | L0d1b1b1  | Angola |
| MF381510 | L1c2a1a   | Angola |
| MF381511 | L0d1a1b1a | Angola |
| MF381512 | L3f1b4a   | Angola |
| MF381513 | L0d1b1b1  | Angola |
| MF381514 | L2c3      | Angola |
| MF381515 | L3f1b4a   | Angola |
| MF381516 | L2c3      | Angola |
| MF381517 | L2c3      | Angola |

|          |              |              |
|----------|--------------|--------------|
| MF381518 | L0d1b1b1     | Angola       |
| MF381519 | L0d1a1b1a    | Angola       |
| MF381520 | L3f1b4a      | Angola       |
| MF381521 | L3d3a1       | Angola       |
| MF381522 | L2c2b1b      | Angola       |
| MF381523 | L2c2b1b      | Angola       |
| MF381524 | L0d1b1b1     | Angola       |
| MF381525 | L3f1b4a      | Angola       |
| MF381526 | L1c3b1a      | Angola       |
| MF381527 | L3f1b4a      | Angola       |
| MF381528 | L3f1b4a      | Angola       |
| MF381529 | L0d1b1b1     | Angola       |
| MF381530 | L0d1a1b1a    | Angola       |
| MF381531 | L0d1b1b1     | Angola       |
| MF381532 | L0d1b1b1     | Angola       |
| MF381533 | L3e2b1a2     | Angola       |
| MF381534 | L0d1a1b1a    | Angola       |
| MF381535 | L3e1a1a      | Angola       |
| MF381536 | L3e1a2       | Angola       |
| MF381575 | L0d2a1a      | Angola       |
| MF381576 | L2e1         | Angola       |
| MF381577 | L3d3a1a      | Angola       |
| MF381578 | L3f1b4a      | Angola       |
| MF381579 | L3e1a2       | Angola       |
| MF381581 | L0d1a1b1a    | Angola       |
| MF621062 | L1c2b1a'b    | Saudi Arabia |
| MF621063 | L3a1a        | Kenya        |
| MF621064 | L3b1a1a      | Kenya        |
| MF621065 | L3b1a+@16124 | Sudan        |
| MF621066 | L3b1a9       | Senegal      |
| MF621067 | L3b1a+152    | Mauritania   |
| MF621068 | L3b1a2       | Sudan        |
| MF621069 | L3b2b        | Mali         |
| MF621070 | L3f1a1       | Sudan        |
| MF621071 | L3f1b+16292  | Senegal      |
| MF621072 | L3f1b+16292  | Saudi Arabia |
| MF621073 | L3f1b        | Spain        |
| MF621074 | L3f2a1a      | Sudan        |
| MF621075 | L3f2a1       | Sudan        |
| MF621076 | L3d1b1b      | Sudan        |
| MF621077 | L3d1b1b      | Sudan        |
| MF621078 | L3d1b3a      | Spain        |
| MF621079 | L3d1b3       | Sudan        |
| MF621080 | L3d1c1       | Ghana        |
| MF621081 | L3d3a1       | Mozambique   |
| MF621082 | L3e1a3b      | Ghana        |
| MF621083 | L3e2a1       | Kenya        |
| MF621084 | L3e2b+152    | Mozambique   |
| MF621085 | L3e3b        | Mali         |
| MF621086 | L3e4a1       | Mauritania   |
| MF621087 | L3e5         | Mali         |
| MF621088 | L3e5a        | Saudi Arabia |
| MF621089 | L3e5         | Spain        |
| MF621090 | L3i1a        | Saudi Arabia |
| MF621091 | L3i2         | Sudan        |
| MF621092 | L3x1a1       | Saudi Arabia |
| MF621093 | L3x1a2       | Kenya        |
| MF695865 | L0a1b1a1a    | Kenya        |
| MF695866 | L0f          | Kenya        |
| MF695867 | L0a2a2a      | Kenya        |
| MF695868 | L3b1a11      | Kenya        |
| MF695869 | L0a1d        | Kenya        |
| MF695870 | L3b1a1a      | Kenya        |
| MF695871 | L0a2a1b      | Kenya        |
| MF695872 | L1c1         | Kenya        |
| MF695874 | L1c2a3       | Kenya        |
| MF695875 | L0a2         | Kenya        |
| MF695876 | L0a2a2a      | Kenya        |
| MF695877 | L0a1'4       | Kenya        |
| MF695878 | L0a          | Kenya        |
| MF695879 | L2a1a2       | Kenya        |
| MF695880 | L0a2a2a      | Kenya        |
| MF695881 | L0f          | Kenya        |
| MF695882 | L2a1a2       | Kenya        |
| MF695883 | L0f1         | Kenya        |
| MF695885 | L3b1a1a      | Kenya        |
| MF695886 | L3e3a        | Kenya        |
| MF695887 | L3e3a        | Kenya        |
| MF695888 | L0a2a2a      | Kenya        |
| MF695889 | L3e3a        | Kenya        |
| MF695890 | L3d1a1a      | Kenya        |
| MF695891 | L0f1         | Kenya        |
| MF695892 | L2d1a        | Kenya        |
| MF695893 | L0a1d        | Kenya        |
| MF695894 | L0f2a1       | Kenya        |
| MF695895 | L0a2         | Kenya        |
| MF695896 | L1b1a        | Kenya        |
| MF695897 | L0a2a2a      | Kenya        |
| MF695898 | L0f2a        | Kenya        |
| MF695899 | L0a          | Kenya        |
| MF695900 | L2a1h        | Kenya        |
| MF695901 | L4b2a2       | Kenya        |

|          |          |       |
|----------|----------|-------|
| MF695902 | L3e1e    | Kenya |
| MF695903 | L4b2a2   | Kenya |
| MF695904 | L3d1a1a1 | Kenya |
| MF695944 | L1c2a1   | Kenya |
| MF695945 | L1c2a1   | Kenya |
| MF695946 | L3e3a    | Kenya |
| MF695947 | L3x1a2   | Kenya |
| MF695948 | L1c2a1   | Kenya |
| MF695949 | L3d1d    | Kenya |
| MF695950 | L3h1a2a1 | Kenya |
| MF695951 | L4b2a2   | Kenya |
| MF695952 | L3h2     | Kenya |
| MF695953 | L1c2a1   | Kenya |
| MF695954 | L2a1f    | Kenya |
| MF695955 | L2a1f    | Kenya |
| MF695956 | L1c2a1   | Kenya |
| MF695957 | L1b1a    | Kenya |
| MF695958 | L1b2a    | Kenya |
| MF695959 | L4b2a2   | Kenya |
| MF695960 | L1b1a3   | Kenya |
| MF695961 | L3x1a2   | Kenya |
| MF695962 | L3d1a1a  | Kenya |
| MF695963 | L1b1a3   | Kenya |
| MF695964 | L2a1f1   | Kenya |
| MF695965 | L0a3     | Kenya |
| MF695966 | L1c2a1   | Kenya |
| MF695967 | L3a1     | Kenya |
| MF695968 | L3d1a1a  | Kenya |
| MF695969 | L1c2a1   | Kenya |
| MF695970 | L1c2a1   | Kenya |
| MF695972 | L3d1a1a  | Kenya |
| MF695973 | L2a1f    | Kenya |
| MF695974 | L0a2a2a  | Kenya |
| MF695975 | L3e3a    | Kenya |
| MF695976 | L4b2a2   | Kenya |
| MF695977 | L3e5     | Kenya |
| MF695978 | L0a2a2a  | Kenya |
| MF695979 | L2a1f    | Kenya |
| MF695980 | L3e3a    | Kenya |
| MF695981 | L2a1f    | Kenya |
| MF695982 | L3e2b    | Kenya |
| MF696023 | L0f      | Kenya |
| MF696024 | L2a1h    | Kenya |
| MF696025 | L2a1f    | Kenya |
| MF696026 | L3a2     | Kenya |
| MF696027 | L3e1e    | Kenya |

|          |          |         |
|----------|----------|---------|
| MF696028 | L3d1a1a  | Kenya   |
| MF696029 | L1c1     | Kenya   |
| MF696030 | L2a1     | Kenya   |
| MF696031 | L0a2a2a  | Kenya   |
| MF696032 | L3x1a2   | Kenya   |
| MF696033 | L0a1a1   | Kenya   |
| MF696034 | L2a1a    | Kenya   |
| MF696035 | L3e1e1   | Kenya   |
| MF696036 | L3e3a    | Kenya   |
| MF696037 | L0a2a2a  | Kenya   |
| MF696038 | L3e3a    | Kenya   |
| MF696039 | L0a1'4   | Kenya   |
| MF696040 | L0f      | Kenya   |
| MF696041 | L5a1     | Kenya   |
| MF696042 | L2a5     | Kenya   |
| MF696044 | L2a1c4a1 | Kenya   |
| MF696045 | L2a1b1a  | Kenya   |
| MF696046 | L3e1a2   | Kenya   |
| MF696047 | L1c2a1a  | Kenya   |
| MF696048 | L0a2a2a  | Kenya   |
| MF696049 | L3x1a2   | Kenya   |
| MF696050 | L3e3a    | Kenya   |
| MF696051 | L0f2a    | Kenya   |
| MF696052 | L0a2a2a  | Kenya   |
| MF696053 | L3f1b4a1 | Kenya   |
| MF696054 | L0d1c    | Kenya   |
| MF696055 | L0a2a2a  | Kenya   |
| MF696056 | L1c2a1a  | Kenya   |
| MF696057 | L0a2a2a  | Kenya   |
| MF696058 | L3d1a1a1 | Kenya   |
| MF696059 | L0f      | Kenya   |
| MF696060 | L3h1a2a1 | Kenya   |
| MF696061 | L1b1a    | Kenya   |
| MF696103 | L1c3a    | Comoros |
| MF696104 | L0a2     | Comoros |
| MF696105 | L0a2a1a  | Comoros |
| MF696106 | L2c2b1b  | Comoros |
| MF696107 | L2a5     | Comoros |
| MF696108 | L3e3a    | Comoros |
| MF696109 | L0a1b1a1 | Comoros |
| MF696110 | L3b1a1a  | Comoros |
| MF696111 | L3b1a1a  | Comoros |
| MF696112 | L1c3a    | Comoros |
| MF696113 | L2a1b1a  | Comoros |
| MF696114 | L0a2a2a  | Comoros |
| MF696115 | L0a2a2a  | Comoros |

|          |             |              |          |           |              |
|----------|-------------|--------------|----------|-----------|--------------|
| MF696116 | L2a1b1a     | Comoros      | MH981653 | L0d2a1a   | South Africa |
| MF696117 | L3e3a       | Comoros      | MH981654 | L1c2a3a   | South Africa |
| MF696118 | L3f2a1      | Comoros      | MH981655 | L3e2b     | South Africa |
| MF696119 | L0a2a2a     | Comoros      | MH981657 | L2a1b1a   | South Africa |
| MF696120 | L0a2a2a     | Comoros      | MH981658 | L0d1a1d   | South Africa |
| MF696121 | L3e3a       | Comoros      | MH981659 | L1c2a3a   | South Africa |
| MF696122 | L0a2a2a     | Comoros      | MH981660 | L0a2a2a   | South Africa |
| MF696123 | L0g         | Comoros      | MH981661 | L0a2a2a   | South Africa |
| MF696124 | L3e3b2      | Comoros      | MH981662 | L3d1a1a1  | South Africa |
| MF696125 | L0k2b       | Comoros      | MH981663 | L0a2a2a   | South Africa |
| MF696126 | L2a1b1a     | Comoros      | MH981664 | L0a2a2a   | South Africa |
| MF696127 | L1c3c       | Comoros      | MH981665 | L2a1b1a   | South Africa |
| MF696128 | L2a1g       | Comoros      | MH981666 | L0d2b2    | South Africa |
| MF696129 | L2a1b1a     | Comoros      | MH981667 | L3d1a1a1  | South Africa |
| MF696130 | L0a2a2a     | Comoros      | MH981668 | L2a1b1a   | South Africa |
| MF696131 | L2a1f3      | Comoros      | MH981669 | L0d2a1a   | South Africa |
| MF696132 | L2a1f       | Comoros      | MH981670 | L0d1b2b2b | South Africa |
| MF696133 | L3e1d1      | Comoros      | NA18499  | L3e2a1b1  | Nigeria      |
| MF696134 | L3f1b1a1    | Comoros      | NA18501  | L1b1a18   | Nigeria      |
| MF696135 | L3f1b1a1    | Comoros      | NA18502  | L3e2b1a2  | Nigeria      |
| MF696136 | L3f1b1a1    | Comoros      | NA18504  | L3e2b     | Nigeria      |
| MF696137 | L3e1d1      | Comoros      | NA18505  | L2a1f2    | Nigeria      |
| MF696138 | L3d1a1a1    | Comoros      | NA18507  | L1b1a3    | Nigeria      |
| MF997504 | L2a1a1      | USA          | NA18508  | L3b1a7a   | Nigeria      |
| MF997533 | L3f1b+16292 | Unknown      | NA18510  | L0a1a3    | USA          |
| MH981628 | L2a1b1a     | South Africa | NA18511  | L2a1f     | Nigeria      |
| MH981629 | L4b2b1      | South Africa | NA18516  | L2b1a3    | Nigeria      |
| MH981630 | L0d1b2b1b   | South Africa | NA18517  | L2c2b1a   | Nigeria      |
| MH981631 | L0a2a1a2    | South Africa | NA18520  | L3f1b4b   | Nigeria      |
| MH981632 | L0d1b2b1b   | South Africa | NA18522  | L2b1a3    | Nigeria      |
| MH981633 | L0a1b1a1    | South Africa | NA18523  | L2a1f     | Nigeria      |
| MH981634 | L0a2a2a     | South Africa | NA18853  | L3e2b     | Nigeria      |
| MH981635 | L3e2b1a2    | South Africa | NA18856  | L2a1b3    | Nigeria      |
| MH981636 | L2a1b1a     | South Africa | NA18858  | L3b3      | Nigeria      |
| MH981637 | L0a2a2a     | South Africa | NA18861  | L0a1a2    | Nigeria      |
| MH981638 | L0d2a1      | South Africa | NA18864  | L3d6      | Nigeria      |
| MH981639 | L1c3a       | South Africa | NA18865  | L3b1a5a   | Nigeria      |
| MH981640 | L2a1a2a1a   | South Africa | NA18867  | L3d1a1b   | Nigeria      |
| MH981641 | L2a1a2a1a   | South Africa | NA18868  | L2a1c1a1  | Nigeria      |
| MH981642 | L2a1b1a     | South Africa | NA18870  | L2b3a     | Nigeria      |
| MH981644 | L0d2c2      | South Africa | NA18871  | L3b1a1    | Nigeria      |
| MH981645 | L2a1b1a     | South Africa | NA18873  | L3e3b     | Nigeria      |
| MH981646 | L3f1b4a1    | South Africa | NA18874  | L2a1a1    | Nigeria      |
| MH981647 | L3f1b4a1    | South Africa | NA18876  | L0a1a2    | Nigeria      |
| MH981648 | L0d1a1a     | South Africa | NA18877  | L0a1a2    | Nigeria      |
| MH981651 | L0d1b2b     | South Africa | NA18878  | L2a1i1    | Nigeria      |

|         |           |         |
|---------|-----------|---------|
| NA18879 | L4b2b     | Nigeria |
| NA18881 | L3f1b1a   | Nigeria |
| NA18907 | L3b1a5a   | Nigeria |
| NA18908 | L2a1c5    | Nigeria |
| NA18909 | L3e4a     | Nigeria |
| NA18910 | L2a1c2a   | Nigeria |
| NA18912 | L2a1c4a1  | Nigeria |
| NA18915 | L1c3b1b   | Nigeria |
| NA18916 | L3b2b     | Nigeria |
| NA19114 | L3e1a3b   | Nigeria |
| NA19116 | L2a1e1    | Nigeria |
| NA19117 | L2a1a2a1a | Nigeria |
| NA19118 | L3e2a1b   | Nigeria |
| NA19119 | L3b1a7a   | Nigeria |
| NA19121 | L3d5a     | Nigeria |
| NA19122 | L2c1a     | Nigeria |
| NA19124 | L3b1a4    | Nigeria |
| NA19125 | L2a1f     | Nigeria |
| NA19129 | L2a1b1    | Nigeria |
| NA19130 | L2a1c3b2  | Nigeria |
| NA19131 | L1b1a     | Nigeria |
| NA19133 | L1b1a3    | Nigeria |
| NA19135 | L1b2a     | Nigeria |
| NA19137 | L0a1a2    | Nigeria |
| NA19138 | L3e2b3    | Nigeria |
| NA19141 | L3e1      | Nigeria |
| NA19143 | L3b1a7a   | Nigeria |
| NA19144 | L3d5a     | Nigeria |
| NA19146 | L2e1a     | Nigeria |
| NA19147 | L3e2b6    | Nigeria |
| NA19149 | L2a1c5    | Nigeria |
| NA19150 | L3e2b8    | Nigeria |
| NA19153 | L3d2b     | Nigeria |
| NA19156 | L0a1a+200 | Nigeria |
| NA19157 | L2a1f     | Nigeria |
| NA19159 | L3f1b4c   | Nigeria |
| NA19160 | L3e2b2    | Nigeria |
| NA19162 | L3e2a2    | Nigeria |
| NA19163 | L1c3b2    | Nigeria |
| NA19166 | L3e1b1    | Nigeria |
| NA19168 | L3e1      | Nigeria |
| NA19171 | L3e3b     | Nigeria |
| NA19175 | L3b1a8    | Nigeria |
| NA19181 | L3b1a8    | Nigeria |
| NA19182 | L3f1b1a   | Nigeria |
| NA19184 | L3e1b1    | Nigeria |

|         |           |         |
|---------|-----------|---------|
| NA19185 | L2b1a3    | Nigeria |
| NA19309 | L3e2b     | Kenya   |
| NA19310 | L3b1a1a   | Kenya   |
| NA19311 | L0a1a+200 | Kenya   |
| NA19312 | L0a2a2a   | Kenya   |
| NA19315 | L3e3b1    | Kenya   |
| NA19316 | L3d1a     | Kenya   |
| NA19317 | L5a1c     | Kenya   |
| NA19318 | L5b2      | Kenya   |
| NA19319 | L3e3b2    | Kenya   |
| NA19320 | L3b1a1a   | Kenya   |
| NA19321 | L3b1a1a   | Kenya   |
| NA19323 | L1c2a1a   | Kenya   |
| NA19324 | L3b1a1a   | Kenya   |
| NA19327 | L0f       | Kenya   |
| NA19328 | L0a2a2a   | Kenya   |
| NA19331 | L3b1a1a   | Kenya   |
| NA19332 | L5b2      | Kenya   |
| NA19334 | L3b1a1a   | Kenya   |
| NA19338 | L3b1a1a   | Kenya   |
| NA19346 | L3b1a1a   | Kenya   |
| NA19347 | L3b1a1a   | Kenya   |
| NA19350 | L0a1a+200 | Kenya   |
| NA19351 | L2a1a2    | Kenya   |
| NA19352 | L3b1a1a   | Kenya   |
| NA19355 | L3b1a1a   | Kenya   |
| NA19359 | L4b2a2    | Kenya   |
| NA19360 | L3b1a1a   | Kenya   |
| NA19371 | L3e1a2    | Kenya   |
| NA19372 | L3b1a1a   | Kenya   |
| NA19373 | L5b1      | Kenya   |
| NA19374 | L5b1      | Kenya   |
| NA19375 | L3b1a1a   | Kenya   |
| NA19376 | L2a4b     | Kenya   |
| NA19377 | L3h1a2a1  | Kenya   |
| NA19378 | L1c2b1a   | Kenya   |
| NA19379 | L0a1a+200 | Kenya   |
| NA19380 | L3b1a1a   | Kenya   |
| NA19381 | L2a1q     | Kenya   |
| NA19455 | L5b2      | Kenya   |
| NA19456 | L3b1a1a   | Kenya   |
| NA19457 | L3h1a1    | Kenya   |
| NA19461 | L5b2      | Kenya   |
| NA19462 | L1b1a15   | Kenya   |
| NA19463 | L4b2a2b   | Kenya   |
| NA19466 | L0a1b1a1a | Kenya   |

|         |           |       |
|---------|-----------|-------|
| NA19467 | L0a1c1    | Kenya |
| NA19468 | L3b1a1a   | Kenya |
| NA19469 | L2a2b1    | Kenya |
| NA19470 | L2a2b1    | Kenya |
| NA19471 | L1b1a3    | Kenya |
| NA19472 | L3b1a1a   | Kenya |
| NA19473 | L3b1a1a   | Kenya |
| NA19474 | L0b       | Kenya |
| NA19475 | L3b1a1a   | Kenya |
| NA19625 | L2a1b+143 | USA   |
| NA19700 | L3e2b+152 | USA   |
| NA19703 | L0a1b1a   | USA   |
| NA19704 | L3e2a1a   | USA   |
| NA19707 | L3e2a     | USA   |
| NA19711 | L3e3b     | USA   |
| NA19712 | L1c2b1c   | USA   |
| NA19713 | L0a2a2a1  | USA   |
| NA19818 | L3e1a3a   | USA   |
| NA19819 | L3e2b+152 | USA   |

|         |              |       |
|---------|--------------|-------|
| NA19834 | L1b1a        | USA   |
| NA19835 | L2c5         | USA   |
| NA19900 | L3e3b        | USA   |
| NA19901 | L3f1b1a      | USA   |
| NA19904 | L0a2a2a      | USA   |
| NA19908 | L2a1c        | USA   |
| NA19909 | L1b2         | USA   |
| NA19913 | L3b1a+@16124 | USA   |
| NA19914 | L1c3a1b      | USA   |
| NA19916 | L1b1a9       | USA   |
| NA19917 | L1c1b        | USA   |
| NA19920 | L3h1b2       | USA   |
| NA20363 | L1c3a        | USA   |
| NA20412 | L1b1a        | USA   |
| NA20414 | L2a1b+143    | USA   |
| NA20753 | L1b1a5       | Italy |
| NA20903 | L2a1d        | USA   |
| NA21118 | L3i1b        | USA   |
| NA21142 | L3i1b        | USA   |
